# Supplementary material for: A dual-modality computational pipeline integrating machine learning and deep neural networks for modelling Drosophila cardiac ageing and disease
Source: Research Square preprint supplement (doi:10.21203/rs.3.rs-7558048/v1), 2025-11-07
Supplement: Supplementary file 1 [file 31fd1db4014d3b061381928f.xlsx]

## Sheet: Rawdata
Name	DD	SD	FS	DI	SI	HP	HR	AI
HOGDH33686_3wf_01_C11440_30s	100.195	88.6918	0.114788	0.481842	0.292162	0.776757	1.2874	0.373994
HOGDH33686_3wf_02_C11440_30s	95.7487	83.3668	0.128944	0.446944	0.345286	0.798143	1.25291	0.756488
HOGDH33686_3wf_03_C11440_30s	119.598	90.0231	0.246551	0.122536	0.312206	0.433676	2.30587	0.171246
HOGDH33686_3wf_04_C11440_30s	77.7323	63.0792	0.187814	0.259706	0.3132	0.5734	1.74398	0.543588
HOGDH33686_3wf_05_C11440_30s	97.7658	82.1931	0.159137	0.369375	0.243298	0.614362	1.62771	0.544084
HOGDH33686_3wf_06_C11440_30s	84.3416	73.8162	0.124788	0.345636	0.192315	0.537963	1.85886	0.164878
HOGDH33686_3wf_07_C11440_30s	96.6735	82.6876	0.144286	0.307373	0.19	0.498017	2.00796	0.295888
HOGDH33686_3wf_08_C11440_30s	101.361	81.3586	0.197328	0.184762	0.169337	0.355241	2.81499	0.113913
HOGDH33686_3wf_09_C11440_30s	117.62	104.431	0.112104	0.425	0.220889	0.652222	1.53322	0.409064
HOGDH33686_3wf_10_C11440_30s	113.25	90.5603	0.200351	0.117119	0.133803	0.25094	3.98501	0.0360372
HOGDH33686_3wf_11_C11440_30s	103.393	91.7299	0.11258	0.614848	0.275156	0.888437	1.12557	0.14862
HOGDH33686_3wf_12_C11440_30s	96.1238	77.0038	0.198897	0.195694	0.215634	0.411338	2.43109	0.137789
HOGDH33686_3wf_13_C11440_30s	97.9157	78.0925	0.202351	0.241045	0.203485	0.444545	2.24949	0.171934
HOGDH33686_3wf_14_C11440_30s	104.723	83.8879	0.198932	0.270231	0.183906	0.454141	2.20196	0.0460341
HOGDH33686_3wf_15_C11440_30s	98.9735	74.8426	0.243457	0.647333	0.287759	0.953276	1.04901	1.52773
HOGDH33686_3wf_16_C11440_30s	115.534	104.243	0.0976446	0.343364	0.196204	0.539352	1.85408	0.175864
HOGDH33686_3wf_17_C11440_30s	94.2241	76.7839	0.185081	0.492195	0.219875	0.71375	1.40105	0.0497623
HOGDH33686_3wf_18_C11440_30s	95.8093	83.5924	0.127509	0.440417	0.179574	0.620638	1.61124	0.0375917
HOGDH33686_3wf_19_C11440_30s	91.3531	77.0759	0.156103	0.267266	0.19373	0.460635	2.17092	0.471332
HOGDH33686_3wf_20_C11440_30s	97.7173	77.3413	0.208244	0.369167	0.184717	0.553491	1.80672	0.151036
HOGDH33686_3wf_21_C11440_30s	114.849	100.957	0.120834	0.326273	0.203148	0.533426	1.87467	1.02376
HOGDH33686_3wf_22_C11440_30s	101.74	79.9591	0.21407	0.321	0.209259	0.529444	1.88877	0.163742
HOGDH33686_3wf_23_C11440_30s	125.017	99.366	0.20517	0.263333	0.181308	0.444538	2.24952	0.127957
HOGDH33686_3wf_24_C11440_30s	93.9217	74.7678	0.203457	0.523462	0.226447	0.751974	1.32983	0.549692
HOGDH33686_3wf_25_C11440_30s	100.938	81.7231	0.190317	0.387917	0.21383	0.59234	1.68822	0.457612
HOGDH33686_3wf_26_C11440_30s	105.965	82.928	0.216137	0.378256	0.307738	0.684405	1.46112	0.418816
HOGDH33686_3wf_27_C11440_30s	97.2498	81.086	0.166158	0.407553	0.227935	0.631522	1.58348	0.205822
HOGDH33686_3wf_28_C11440_30s	99.0217	81.6574	0.175351	0.511806	0.324286	0.833429	1.19986	0.195888
HOGDH33686_3wf_29_C11440_30s	95.4308	72.1192	0.244229	0.360804	0.170727	0.531364	1.88195	0.0977591
HOGDH33686_3wf_30_C11440_30s	104.481	89.5868	0.142553	0.190915	0.174321	0.365247	2.73787	0.154683
HandW1118_01_C11440_30s	71.9728	44.0671	0.387677	0.3053	0.274286	0.579082	1.72687	0.16061
HandW1118_02_C11440_30s	75.5446	58.5743	0.224552	0.171477	0.167471	0.338678	2.95266	0.133946
HandW1118_03_C11440_30s	77.5337	50.3667	0.350337	0.177365	0.221575	0.400753	2.4953	0.116823
HandW1118_04_C11440_30s	71.7877	51.3769	0.284148	0.330943	0.214135	0.546635	1.82938	0.387983
HandW1118_05_C11440_30s	65.7598	43.0632	0.344982	0.236967	0.247917	0.486	2.05761	0.164515
HandW1118_06_C11440_30s	93.3763	65.998	0.293042	0.257213	0.231583	0.491167	2.03597	0.135698
HandW1118_07_C11440_30s	68.6158	49.5429	0.277871	0.223692	0.231484	0.455625	2.19479	0.35303
HandW1118_08_C11440_30s	72.9596	59.9463	0.17824	0.512143	0.340735	0.858676	1.16458	0.459728
HandW1118_09_C11440_30s	87.9332	57.0699	0.350884	0.553788	0.335	0.88625	1.12835	0.152043
HandW1118_10_C11440_30s	77.8696	52.4281	0.326711	0.170655	0.182349	0.353072	2.83228	0.155132
HandW1118_11_C11440_30s	85.1608	60.3736	0.290996	0.240565	0.241721	0.482951	2.0706	0.0301418
HandW1118_12_C11440_30s	72.3507	47.0207	0.349994	0.275806	0.206066	0.481721	2.07589	0.028348
HandW1118_13_C11440_30s	77.4027	51.4204	0.335542	0.145	0.168085	0.313245	3.19239	0.156017
HandW1118_14_C11440_30s	84.7127	51.942	0.38675	0.248889	0.222903	0.471371	2.12147	0.145637
HandW1118_15_C11440_30s	76.162	50.6825	0.334489	0.212465	0.207286	0.42	2.38095	0.0289443
HandW1118_16_C11440_30s	85.7009	48.7426	0.431061	0.170698	0.172765	0.343529	2.91096	0.134919
HandW1118_17_C11440_30s	100.803	62.3883	0.381017	0.132194	0.173247	0.306392	3.2638	0.22588
HandW1118_18_C11440_30s	71.8345	43.08	0.399886	0.183373	0.175305	0.35878	2.78722	0.205458
HandW1118_19_C11440_30s	90.5353	55.8289	0.38327	0.150957	0.164892	0.315806	3.1665	0.110666
HandW1118_20_C11440_30s	91.0591	51.7843	0.431269	0.162784	0.17592	0.338678	2.95266	0.0970225
HandW1118_21_C11440_30s	81.587	57.0084	0.301251	0.572361	0.248571	0.819571	1.22015	0.0689966
HandW1118_22_C11440_30s	87.3249	56.6721	0.350951	0.151023	0.185862	0.336839	2.96878	0.106795
HandW1118_23_C11440_30s	68.6945	47.1841	0.312894	0.311667	0.2731	0.5855	1.70794	0.0719219
HandW1118_24_C11440_30s	71.729	47.8216	0.333268	0.174125	0.194304	0.368418	2.71431	0.109969
HandW1118_25_C11440_30s	96.523	60.1838	0.376264	0.272414	0.238246	0.510789	1.95775	0.0324271
HandW1118_26_C11440_30s	72.4724	55.0185	0.238997	0.130343	0.162574	0.293119	3.41159	0.292465
HandW1118_27_C11440_30s	90.7063	62.3871	0.312087	0.496282	0.269474	0.765789	1.30584	0.0517131
HandW1118_28_C11440_30s	74.4207	48.22	0.35202	0.12295	0.173788	0.296717	3.37021	0.0245866
HandW1118_29_C11440_30s	78.5932	45.3454	0.423154	0.287037	0.267736	0.556415	1.79722	0.216112
HandW1118_30_C11440_30s	71.1336	48.9584	0.311549	0.258231	0.195234	0.454453	2.20045	0.406265
HandW1118_31_C11440_30s	73.1401	48.3508	0.338787	0.283839	0.240545	0.522909	1.91238	0.177585
HandW1118_32_C11440_30s	98.5336	58.0119	0.411243	0.272768	0.255636	0.528455	1.89231	0.0270969
HandW1118_33_C11440_30s	68.0823	42.7721	0.370535	0.278229	0.340745	0.620532	1.61152	0.28487
HandW1118_34_C11440_30s	64.127	47.522	0.258584	0.375957	0.254348	0.630761	1.58539	0.345236
HandW1118_35_C11440_30s	69.6921	47.8403	0.313098	0.3625	0.259255	0.621277	1.60959	0.0492177

## Sheet: TopFeatures
Feature	Importance
SD-AI	0.10579
HR-SD	0.0964257
FS-SD	0.0964212
AI-SD	0.0909663
SD	0.0789795
SD-FS	0.0763242
FS/DD	0.0663486
SD-HR	0.0635713
FS/SD	0.0578258
DD/FS	0.0570209
SD/FS	0.0489998
SD/DD	0.0316202
FS	0.0309222
DD/SD	0.0165055
FS-DD	0.0103957
DD-FS	0.00957981
FS/HR	0.00593317
DD-HR	0.00592746
DD-AI	0.00592441
HR-DD	0.00581268
SD/HR	0.00536084
FS-AI	0.00493038
AI-DD	0.00411537
HR/SD	0.00382855
AI-FS	0.00289484
HR*FS	0.00247704
HR/DD	0.00247159
DD-SD	0.002266
FS/AI	0.00138921
DD	0.00112446
AI/FS	0.000931925
DD/HR	0.000701653
AI/SD	0.000694162
SD-DD	0.000676154
AI/DD	0.000598902
AI-HR	0.000593408
AI	0.000587251
AI/HR	0.000586804
SD/AI	0.000573687
DD/AI	0.000523619
HR	0.000406379
HR/AI	0.000389771
HR/FS	0.000387399
HR-FS	0.0001
DI	9.59268e-05
HP	0
FS-HR	0
SI	0
HR-AI	0

## Sheet: Unsupervised_Logits
Name	TrueTarget	PredClusterRaw	PredClusterMapped	Dist_C0	Dist_C1	Logit_C0	Logit_C1	Prob_C0	Prob_C1	PredMappedProb	PC1	PC2
HOGDH33686_3wf_01_C11440_30s	1	0	1	0.57009	4.63485	-0.162501	-10.7409	0.999975	2.54595e-05	2.54595e-05	2.82094	-0.0315222
HOGDH33686_3wf_02_C11440_30s	1	0	1	0.139489	3.93579	-0.00972862	-7.74522	0.999563	0.000436848	0.000436848	2.12162	-0.0505346
HOGDH33686_3wf_03_C11440_30s	1	0	1	0.721276	4.78608	-0.26012	-11.4533	0.999986	1.37679e-05	1.37679e-05	2.97224	0.0264787
HOGDH33686_3wf_04_C11440_30s	1	1	0	2.7246	1.3414	-3.71173	-0.899676	0.0566765	0.943324	0.0566765	-0.472844	-0.0294381
HOGDH33686_3wf_05_C11440_30s	1	0	1	0.280289	3.78622	-0.0392809	-7.16773	0.999199	0.000801316	0.000801316	1.97233	-0.0248046
HOGDH33686_3wf_06_C11440_30s	1	0	1	1.3348	2.73059	-0.890846	-3.72806	0.944654	0.0553462	0.0553462	0.916799	-0.00342351
HOGDH33686_3wf_07_C11440_30s	1	0	1	0.212715	3.85276	-0.0226237	-7.42189	0.999389	0.000611326	0.000611326	2.03898	0.00368007
HOGDH33686_3wf_08_C11440_30s	1	0	1	0.398254	3.67085	-0.0793033	-6.73759	0.998718	0.0012817	0.0012817	1.85677	0.0494422
HOGDH33686_3wf_09_C11440_30s	1	0	1	2.57184	6.6372	-3.30717	-22.0262	1	7.42042e-09	7.42042e-09	4.8234	-0.0122256
HOGDH33686_3wf_10_C11440_30s	1	0	1	0.764025	4.82153	-0.291867	-11.6236	0.999988	1.19868e-05	1.19868e-05	3.00642	0.115169
HOGDH33686_3wf_11_C11440_30s	1	0	1	0.97366	5.03864	-0.474007	-12.694	0.999995	4.93105e-06	4.93105e-06	3.22474	-0.0294181
HOGDH33686_3wf_12_C11440_30s	1	0	1	0.943098	3.12285	-0.444717	-4.87609	0.988242	0.0117583	0.0117583	1.30897	0.0272094
HOGDH33686_3wf_13_C11440_30s	1	0	1	0.801054	3.26461	-0.320844	-5.32883	0.99336	0.00663994	0.00663994	1.45079	0.0175071
HOGDH33686_3wf_14_C11440_30s	1	0	1	0.0596972	4.01267	-0.00178188	-8.05078	0.999681	0.00031932	0.00031932	2.19883	0.023013
HOGDH33686_3wf_15_C11440_30s	1	0	1	1.2606	2.81138	-0.794551	-3.95193	0.959198	0.0408016	0.0408016	0.995429	-0.0947971
HOGDH33686_3wf_16_C11440_30s	1	0	1	2.55208	6.6174	-3.25656	-21.895	1	8.04345e-09	8.04345e-09	4.8036	0.0123888
HOGDH33686_3wf_17_C11440_30s	1	0	1	0.940065	3.12575	-0.441861	-4.88517	0.98838	0.0116204	0.0116204	1.31185	-0.0204829
HOGDH33686_3wf_18_C11440_30s	1	0	1	0.0749675	3.99212	-0.00281006	-7.96852	0.999653	0.000347046	0.000347046	2.17831	-0.00566325
HOGDH33686_3wf_19_C11440_30s	1	0	1	0.942956	3.12255	-0.444583	-4.87516	0.988232	0.0117675	0.0117675	1.30874	0.0020755
HOGDH33686_3wf_20_C11440_30s	1	0	1	0.884644	3.18078	-0.391298	-5.05868	0.990691	0.00930937	0.00930937	1.36699	-0.00404696
HOGDH33686_3wf_21_C11440_30s	1	0	1	2.088	6.15316	-2.17987	-18.9307	1	5.31139e-08	5.31139e-08	4.33925	-0.020343
HOGDH33686_3wf_22_C11440_30s	1	0	1	0.553169	3.51227	-0.152998	-6.16803	0.997564	0.00243583	0.00243583	1.69849	0.000906925
HOGDH33686_3wf_23_C11440_30s	1	0	1	1.9191	5.98422	-1.84147	-17.9055	1	1.0556e-07	1.0556e-07	4.17037	0.0305527
HOGDH33686_3wf_24_C11440_30s	1	0	1	1.22231	2.84415	-0.747025	-4.0446	0.964346	0.0356545	0.0356545	1.02999	-0.0439738
HOGDH33686_3wf_25_C11440_30s	1	0	1	0.337604	3.72825	-0.0569883	-6.94994	0.998986	0.00101389	0.00101389	1.91441	-0.018983
HOGDH33686_3wf_26_C11440_30s	1	0	1	0.178013	3.88931	-0.0158444	-7.56338	0.999473	0.000527129	0.000527129	2.07542	-0.0282541
HOGDH33686_3wf_27_C11440_30s	1	0	1	0.402618	3.66305	-0.0810504	-6.70899	0.998679	0.00132114	0.00132114	1.84923	-0.0149129
HOGDH33686_3wf_28_C11440_30s	1	0	1	0.321084	3.74618	-0.0515476	-7.01695	0.999057	0.000943095	0.000943095	1.93222	-0.0332611
HOGDH33686_3wf_29_C11440_30s	1	0	1	1.55177	2.51365	-1.204	-3.15921	0.876014	0.123986	0.123986	0.69985	-0.00131867
HOGDH33686_3wf_30_C11440_30s	1	0	1	0.659491	4.72306	-0.217464	-11.1537	0.999982	1.78017e-05	1.78017e-05	2.90906	0.0488048
HandW1118_01_C11440_30s	0	1	0	5.13801	1.073	-13.1996	-0.57567	3.29232e-06	0.999997	3.29232e-06	-2.88636	-0.0271738
HandW1118_02_C11440_30s	0	1	0	3.31072	0.75613	-5.48044	-0.285866	0.00551598	0.994484	0.00551598	-1.05881	0.0431351
HandW1118_03_C11440_30s	0	1	0	4.34958	0.284514	-9.45944	-0.040474	8.11634e-05	0.999919	8.11634e-05	-2.09796	0.0160676
HandW1118_04_C11440_30s	0	1	0	4.21593	0.153374	-8.88702	-0.0117618	0.000139785	0.99986	0.000139785	-1.96427	-0.0261647
HandW1118_05_C11440_30s	0	1	0	5.27368	1.20838	-13.9058	-0.730093	1.89603e-06	0.999998	1.89603e-06	-3.02208	-0.0112644
HandW1118_06_C11440_30s	0	1	0	2.34074	1.72465	-2.73953	-1.48721	0.222297	0.777703	0.222297	-0.0891404	0.00132754
HandW1118_07_C11440_30s	0	1	0	4.45745	0.39236	-9.93443	-0.0769734	5.23525e-05	0.999948	5.23525e-05	-2.20585	-0.00772309
HandW1118_08_C11440_30s	0	1	0	3.10586	0.961802	-4.82318	-0.462531	0.0126091	0.987391	0.0126091	-0.853801	-0.0565782
HandW1118_09_C11440_30s	0	1	0	3.46083	0.607259	-5.98869	-0.184382	0.00300549	0.996995	0.00300549	-1.2089	-0.0492896
HandW1118_10_C11440_30s	0	1	0	4.09629	0.0435936	-8.38978	-0.000950199	0.000227341	0.999773	0.000227341	-1.84454	0.0325327
HandW1118_11_C11440_30s	0	1	0	3.0546	1.01083	-4.6653	-0.510891	0.0154525	0.984548	0.0154525	-0.802992	0.00400303
HandW1118_12_C11440_30s	0	1	0	4.76177	0.696467	-11.3372	-0.242533	1.51924e-05	0.999985	1.51924e-05	-2.51018	-0.00314863
HandW1118_13_C11440_30s	0	1	0	4.23457	0.175708	-8.96581	-0.0154366	0.000129672	0.99987	0.000129672	-1.98265	0.0497263
HandW1118_14_C11440_30s	0	1	0	4.14125	0.0761995	-8.575	-0.00290319	0.00018928	0.999811	0.00018928	-1.88966	-0.00286236
HandW1118_15_C11440_30s	0	1	0	4.30143	0.236373	-9.25113	-0.027936	9.8713e-05	0.999901	9.8713e-05	-2.0498	0.0139686
HandW1118_16_C11440_30s	0	1	0	4.57067	0.506205	-10.4455	-0.128122	3.30524e-05	0.999967	3.30524e-05	-2.31893	0.0346409
HandW1118_17_C11440_30s	0	1	0	2.84044	1.2268	-4.03404	-0.752516	0.0362105	0.96379	0.0362105	-0.588218	0.0562669
HandW1118_18_C11440_30s	0	1	0	5.29359	1.22836	-14.0111	-0.754436	1.74871e-06	0.999998	1.74871e-06	-3.04194	0.0230019
HandW1118_19_C11440_30s	0	1	0	3.66977	0.39919	-6.73361	-0.0796763	0.00128729	0.998713	0.00128729	-1.41777	0.0522536
HandW1118_20_C11440_30s	0	1	0	4.18131	0.1217	-8.74166	-0.00740549	0.00016095	0.999839	0.00016095	-1.9295	0.0397577
HandW1118_21_C11440_30s	0	1	0	3.4654	0.602035	-6.00449	-0.181223	0.00294919	0.997051	0.00294919	-1.21355	-0.0413904
HandW1118_22_C11440_30s	0	1	0	3.5559	0.511418	-6.32223	-0.130774	0.00204267	0.997957	0.00204267	-1.30402	0.0432456
HandW1118_23_C11440_30s	0	1	0	4.73291	0.668022	-11.2002	-0.223126	1.70884e-05	0.999983	1.70884e-05	-2.48127	-0.0226995
HandW1118_24_C11440_30s	0	1	0	4.67949	0.614504	-10.9488	-0.188808	2.12311e-05	0.999979	2.12311e-05	-2.42782	0.0258881
HandW1118_25_C11440_30s	0	1	0	3.07828	0.987228	-4.73789	-0.487309	0.0140556	0.985944	0.0140556	-0.826654	-0.00223119
HandW1118_26_C11440_30s	0	1	0	3.78529	0.286919	-7.1642	-0.0411613	0.000805662	0.999194	0.000805662	-1.53316	0.0578969
HandW1118_27_C11440_30s	0	1	0	2.77988	1.28635	-3.86386	-0.82735	0.0458033	0.954197	0.0458033	-0.528055	-0.0336765
HandW1118_28_C11440_30s	0	1	0	4.64167	0.578944	-10.7726	-0.167588	2.47915e-05	0.999975	2.47915e-05	-2.38964	0.0616567
HandW1118_29_C11440_30s	0	1	0	4.98025	0.915262	-12.4015	-0.418852	6.25191e-06	0.999994	6.25191e-06	-2.72861	-0.0252869
HandW1118_30_C11440_30s	0	1	0	4.53585	0.470801	-10.287	-0.110827	3.80661e-05	0.999962	3.80661e-05	-2.28424	-0.00994015
HandW1118_31_C11440_30s	0	1	0	4.59511	0.530045	-10.5575	-0.140474	2.99175e-05	0.99997	2.99175e-05	-2.3435	-0.0160717
HandW1118_32_C11440_30s	0	1	0	3.35467	0.710958	-5.62691	-0.25273	0.00461333	0.995387	0.00461333	-1.10304	-0.00662325
HandW1118_33_C11440_30s	0	1	0	5.30651	1.24168	-14.0795	-0.770887	1.66011e-06	0.999998	1.66011e-06	-3.0548	-0.0381511
HandW1118_34_C11440_30s	0	1	0	4.69938	0.635215	-11.0421	-0.201749	1.95926e-05	0.99998	1.95926e-05	-2.44765	-0.0385567
HandW1118_35_C11440_30s	0	1	0	4.64547	0.580843	-10.7902	-0.168689	2.43858e-05	0.999976	2.43858e-05	-2.3938	-0.0263613

## Sheet: Supervised_Logits
Name	Fold	True_Label	Predicted_Label	Prob_1	Logit_1
HOGDH33686_3wf_10_C11440_30s	1	1	1	0.776667	1.24635
HOGDH33686_3wf_11_C11440_30s	1	1	1	1	20.7233
HOGDH33686_3wf_13_C11440_30s	1	1	1	1	20.7233
HOGDH33686_3wf_17_C11440_30s	1	1	1	0.98	3.89182
HOGDH33686_3wf_18_C11440_30s	1	1	1	0.993333	5.00395
HOGDH33686_3wf_20_C11440_30s	1	1	1	0.996667	5.70044
HandW1118_03_C11440_30s	1	0	0	0	-20.7233
HandW1118_05_C11440_30s	1	0	0	0	-20.7233
HandW1118_13_C11440_30s	1	0	0	0	-20.7233
HandW1118_17_C11440_30s	1	0	0	0.1	-2.19722
HandW1118_21_C11440_30s	1	0	0	0.0466667	-3.01693
HandW1118_23_C11440_30s	1	0	0	0.00666667	-5.00395
HandW1118_24_C11440_30s	1	0	0	0	-20.7233
HOGDH33686_3wf_05_C11440_30s	2	1	1	1	20.7233
HOGDH33686_3wf_06_C11440_30s	2	1	1	0.893333	2.12525
HOGDH33686_3wf_15_C11440_30s	2	1	1	0.913333	2.35503
HOGDH33686_3wf_26_C11440_30s	2	1	1	0.99	4.59512
HOGDH33686_3wf_27_C11440_30s	2	1	1	1	20.7233
HOGDH33686_3wf_30_C11440_30s	2	1	1	1	20.7233
HandW1118_01_C11440_30s	2	0	0	0	-20.7233
HandW1118_02_C11440_30s	2	0	0	0.263333	-1.02871
HandW1118_08_C11440_30s	2	0	0	0.476667	-0.0934012
HandW1118_12_C11440_30s	2	0	0	0	-20.7233
HandW1118_14_C11440_30s	2	0	0	0	-20.7233
HandW1118_20_C11440_30s	2	0	0	0.00333333	-5.70044
HandW1118_28_C11440_30s	2	0	0	0	-20.7233
HOGDH33686_3wf_02_C11440_30s	3	1	1	0.99	4.59512
HOGDH33686_3wf_04_C11440_30s	3	1	0	0.156667	-1.68324
HOGDH33686_3wf_09_C11440_30s	3	1	1	0.98	3.89182
HOGDH33686_3wf_12_C11440_30s	3	1	1	0.976667	3.73426
HOGDH33686_3wf_14_C11440_30s	3	1	1	0.99	4.59512
HOGDH33686_3wf_28_C11440_30s	3	1	1	0.973333	3.59731
HandW1118_07_C11440_30s	3	0	0	0.0133333	-4.30407
HandW1118_18_C11440_30s	3	0	0	0	-20.7233
HandW1118_19_C11440_30s	3	0	0	0	-20.7233
HandW1118_26_C11440_30s	3	0	0	0.0833333	-2.3979
HandW1118_29_C11440_30s	3	0	0	0	-20.7233
HandW1118_33_C11440_30s	3	0	0	0	-20.7233
HandW1118_34_C11440_30s	3	0	0	0.13	-1.90096
HOGDH33686_3wf_03_C11440_30s	4	1	1	0.8	1.38629
HOGDH33686_3wf_16_C11440_30s	4	1	1	1	20.7233
HOGDH33686_3wf_21_C11440_30s	4	1	1	1	20.7233
HOGDH33686_3wf_23_C11440_30s	4	1	1	0.98	3.89182
HOGDH33686_3wf_25_C11440_30s	4	1	1	1	20.7233
HOGDH33686_3wf_29_C11440_30s	4	1	1	0.83	1.58563
HandW1118_04_C11440_30s	4	0	0	0.00333333	-5.70044
HandW1118_06_C11440_30s	4	0	0	0.356667	-0.589861
HandW1118_09_C11440_30s	4	0	0	0.0466667	-3.01693
HandW1118_16_C11440_30s	4	0	0	0	-20.7233
HandW1118_25_C11440_30s	4	0	0	0.0266667	-3.59731
HandW1118_27_C11440_30s	4	0	0	0.183333	-1.49393
HandW1118_35_C11440_30s	4	0	0	0.00333333	-5.70044
HOGDH33686_3wf_01_C11440_30s	5	1	1	1	20.7233
HOGDH33686_3wf_07_C11440_30s	5	1	1	1	20.7233
HOGDH33686_3wf_08_C11440_30s	5	1	1	0.956667	3.09453
HOGDH33686_3wf_19_C11440_30s	5	1	1	0.903333	2.23482
HOGDH33686_3wf_22_C11440_30s	5	1	1	0.993333	5.00395
HOGDH33686_3wf_24_C11440_30s	5	1	1	0.976667	3.73426
HandW1118_10_C11440_30s	5	0	0	0.00333333	-5.70044
HandW1118_11_C11440_30s	5	0	0	0.01	-4.59512
HandW1118_15_C11440_30s	5	0	0	0.00333333	-5.70044
HandW1118_22_C11440_30s	5	0	0	0	-20.7233
HandW1118_30_C11440_30s	5	0	0	0	-20.7233
HandW1118_31_C11440_30s	5	0	0	0	-20.7233
HandW1118_32_C11440_30s	5	0	0	0.0533333	-2.87639

## Sheet: Video_classification_logits
SampleID	Raw Preds 1	Labels	Fold
HandW1118_01_C11440_30s.avi	0.352684	0	1
HandW1118_06_C11440_30s.avi	0.0360298	0	1
HandW1118_10_C11440_30s.avi	0.0613745	0	1
HandW1118_13_C11440_30s.avi	0.335634	0	1
HandW1118_17_C11440_30s.avi	0.0334183	0	1
HandW1118_31_C11440_30s.avi	0.0695949	0	1
HandW1118_34_C11440_30s.avi	0.117057	0	1
HOGDH33686_3wf_07_C11440_30s.avi	0.950439	1	1
HOGDH33686_3wf_11_C11440_30s.avi	0.944926	1	1
HOGDH33686_3wf_19_C11440_30s.avi	0.640658	1	1
HOGDH33686_3wf_26_C11440_30s.avi	0.532032	1	1
HOGDH33686_3wf_27_C11440_30s.avi	0.931799	1	1
HOGDH33686_3wf_30_C11440_30s.avi	0.983701	1	1
HandW1118_04_C11440_30s.avi	0.0715803	0	2
HandW1118_05_C11440_30s.avi	0.0611812	0	2
HandW1118_07_C11440_30s.avi	0.237069	0	2
HandW1118_09_C11440_30s.avi	0.130156	0	2
HandW1118_14_C11440_30s.avi	0.173153	0	2
HandW1118_18_C11440_30s.avi	0.348735	0	2
HandW1118_20_C11440_30s.avi	0.447757	0	2
HandW1118_26_C11440_30s.avi	0.938881	1	2
HandW1118_35_C11440_30s.avi	0.972456	1	2
HOGDH33686_3wf_02_C11440_30s.avi	0.754328	1	2
HOGDH33686_3wf_06_C11440_30s.avi	0.839399	1	2
HOGDH33686_3wf_14_C11440_30s.avi	0.719913	1	2
HOGDH33686_3wf_29_C11440_30s.avi	0.976026	1	2
HandW1118_12_C11440_30s.avi	0.233145	0	3
HandW1118_16_C11440_30s.avi	0.0670987	0	3
HandW1118_25_C11440_30s.avi	0.516405	0	3
HandW1118_27_C11440_30s.avi	0.252599	0	3
HandW1118_28_C11440_30s.avi	0.280364	0	3
HandW1118_32_C11440_30s.avi	0.232764	0	3
HOGDH33686_3wf_10_C11440_30s.avi	0.304097	0	3
HOGDH33686_3wf_13_C11440_30s.avi	0.963108	1	3
HOGDH33686_3wf_16_C11440_30s.avi	0.926177	1	3
HOGDH33686_3wf_21_C11440_30s.avi	0.841642	1	3
HOGDH33686_3wf_22_C11440_30s.avi	0.915454	1	3
HOGDH33686_3wf_24_C11440_30s.avi	0.991093	1	3
HOGDH33686_3wf_28_C11440_30s.avi	0.915907	1	3
HandW1118_02_C11440_30s.avi	0.0175783	0	4
HandW1118_03_C11440_30s.avi	0.214781	0	4
HandW1118_22_C11440_30s.avi	0.067529	0	4
HandW1118_30_C11440_30s.avi	0.00881901	0	4
HandW1118_33_C11440_30s.avi	0.0462545	0	4
HOGDH33686_3wf_01_C11440_30s.avi	0.344115	0	4
HOGDH33686_3wf_03_C11440_30s.avi	0.117348	0	4
HOGDH33686_3wf_05_C11440_30s.avi	0.955772	1	4
HOGDH33686_3wf_09_C11440_30s.avi	0.878305	1	4
HOGDH33686_3wf_12_C11440_30s.avi	0.947614	1	4
HOGDH33686_3wf_15_C11440_30s.avi	0.943151	1	4
HOGDH33686_3wf_18_C11440_30s.avi	0.969634	1	4
HOGDH33686_3wf_25_C11440_30s.avi	0.989971	1	4
HandW1118_08_C11440_30s.avi	0.119594	0	5
HandW1118_11_C11440_30s.avi	0.751036	0	5
HandW1118_15_C11440_30s.avi	0.916852	0	5
HandW1118_19_C11440_30s.avi	0.218692	0	5
HandW1118_21_C11440_30s.avi	0.628204	0	5
HandW1118_23_C11440_30s.avi	0.0335468	0	5
HandW1118_24_C11440_30s.avi	0.356822	0	5
HandW1118_29_C11440_30s.avi	0.989599	1	5
HOGDH33686_3wf_04_C11440_30s.avi	0.965372	1	5
HOGDH33686_3wf_08_C11440_30s.avi	0.987615	1	5
HOGDH33686_3wf_17_C11440_30s.avi	0.998142	1	5
HOGDH33686_3wf_20_C11440_30s.avi	0.994603	1	5
HOGDH33686_3wf_23_C11440_30s.avi	0.972378	1	5
