# Supplementary material for: A dual-modality computational pipeline integrating machine learning and deep neural networks for modelling Drosophila cardiac ageing and disease
Source: Research Square preprint supplement (doi:10.21203/rs.3.rs-7558048/v1), 2025-11-07
Supplement: Supplementary file 2 [file 98164b0514871d37d5e02bed.docx]

**Supplementary Table1**: Shows the raw data of 1-week & 5-week Age classification and video classification logits.

- Tab 1: Shows the raw data obtained from U-Net segmentation which is used for further analysis.
- Tab 2: Shows the feature importance scores after deriving the features.
- Tab 3: Shows the unsupervised learning logits which was done using kmeans++.
- Tab 4: Shows supervised learning logits which is done with the help of ensemble learning.
- Tab 5: Shows the video classification raw prediction scores across 5-folds which is done with 2D CNNs.

**Supplementary** **Table 2**: Shows the raw data of Control & LamCG489V classification and video classification logits.

- Tab 1: Shows the raw data obtained from U-Net segmentation which is used for further analysis.
- Tab 2: Shows the feature importance scores after deriving the features.
- Tab 3: Shows the unsupervised learning logits which was done using kmeans++.
- Tab 4: Shows supervised learning logits which is done with the help of Random Forest classification based on the features derived.
- Tab 5: Shows the video classification raw prediction scores across 5-folds which is done with 3D CNNs.

**Supplementary Table3**: Shows the raw data of Control & *Ogdh* knock-down classification and video classification logits

- Tab 1: Shows the raw data obtained from U-Net segmentation which is used for further analysis.
- Tab 2: Shows the feature importance scores after deriving the features.
- Tab 3: Shows the unsupervised learning logits which was done using kmeans++.
- Tab 4: Shows supervised learning logits which is done with the help of Random Forest classification based on the features derived.
- Tab 5: Shows the video classification raw prediction scores across 5-folds which is done with 3D CNNs.
