# Supplementary material for: A dual-modality computational pipeline integrating machine learning and deep neural networks for modelling Drosophila cardiac ageing and disease
Source: Research Square preprint supplement (doi:10.21203/rs.3.rs-7558048/v1), 2025-11-07
Supplement: Supplementary file 3 [file b794f101c5ca39fa9b599b5e.xlsx]

## Sheet: Raw_Data
	Name	Calculation ROI	Logits_Threshold	Mean DD:	STD DD	Mean SD	STD SD	Mean FS	STD FS	Mean EF	STD EF	Mean DI	STD DI	Mean SI	STD SI	Mean HP	STD HP	Mean HR	STD HR	Mean AI
0	CS_1wf_19_C11440_30s	[117, 339]	0.275	69.6772	0.751881	47.5198	1.24991	0.318057	0.0139473	0.53476	0.0188737	0.307963	0.122412	0.236321	0.0119018	0.544717	0.130092	1.83582	0.438439	0.255083
1	CS_5wf_38_C11440_30s	[52, 307]	0.3	78.8206	1.42214	54.386	1.59702	0.309867	0.0212808	0.523264	0.0295981	0.617812	0.321408	0.306774	0.0810272	0.941935	0.329943	1.06164	0.371875	0.320333
2	CS_1wf_40_C11440_30s	[121, 348]	0.325	87.3697	2.98928	60.5157	1.44021	0.30684	0.0208133	0.519096	0.0289136	0.426707	0.0717432	0.285875	0.0447477	0.713	0.0930175	1.40252	0.182972	0.127421
3	CS_1wf_21_C11440_30s	[121, 303]	0.425	78.7374	0.309503	54.228	0.396668	0.31126	0.0068566	0.52559	0.00942181	0.501	0.0905	0.233077	0.0237405	0.732179	0.0969589	1.36579	0.180864	0.13753
4	CS_5wm_59_C11440_30s	[212, 372]	0.35	56.2076	1.07067	36.591	0.826226	0.34891	0.0133938	0.575903	0.0173415	0.575714	0.107709	0.457963	0.12171	1.03296	0.100851	0.968089	0.0945168	0.0983909
5	CS_5wm_54_C11440_30s	[97, 380]	0.45	67.5785	1.03562	42.6663	0.30553	0.36849	0.0108811	0.601076	0.0136756	0.333558	0.0388332	0.239902	0.00546739	0.573431	0.0408067	1.74389	0.124099	0.0703564
6	CS_1wm_12_C11440_30s	[96, 204]	0.425	66.6033	1.14029	42.5749	1.48256	0.3609	0.0143018	0.591346	0.0183087	0.4755	0.11366	0.247821	0.00814885	0.727051	0.116507	1.37542	0.220406	0.165259
7	CS_5wf_48_C11440_30s	[81, 323]	0.3	82.4945	0.1399	60.6497	0.500863	0.264808	0.00539609	0.459464	0.00796071	0.612581	0.0229259	0.347667	0.00901234	0.960833	0.0221014	1.04076	0.02394	0.022903
8	CS_5wm_29_C11440_30s	[200, 512]	0.3	61.6996	3.1429	39.1961	0.937459	0.363323	0.030764	0.593696	0.0405586	1.83682	0.794819	0.9005	0.359412	2.9135	0.471646	0.34323	0.0555631	0.166366
9	CS_5wm_02_C11440_30s	[157, 512]	0.25	70.409	2.21251	40.6886	0.688086	0.4216	0.01882	0.6651	0.021867	0.779348	1.09486	0.517273	0.164757	1.32795	1.06349	0.753038	0.603069	1.30091
10	CS_5wf_56_C11440_30s	[119, 293]	0.3	81.3117	0.506107	61.964	0.367141	0.237924	0.0054552	0.419211	0.00830299	0.533243	0.0317553	0.256667	0.00634648	0.790139	0.0326064	1.2656	0.0522271	0.0411437
11	CS_5wf_29_C11440_30s	[177, 512]	0.25	72.9557	0.110339	54.8948	0.114303	0.247557	0.00210356	0.433825	0.00316537	0.382065	0.0357007	0.256333	0.00609189	0.639556	0.0388848	1.56359	0.0950655	0.0602865
12	CS_1wm_10_C11440_30s	[109, 307]	0.4	67.8381	2.61809	42.9445	1.67553	0.366479	0.0249098	0.598031	0.0322523	0.269091	0.146148	0.263426	0.0240913	0.529907	0.147257	1.88712	0.524417	0.242399
13	CS_5wm_11_C11440_30s	[88, 369]	0.35	58.7059	1.5354	34.2985	0.479342	0.415224	0.0216315	0.657569	0.0260539	0.555167	0.375132	0.422241	0.0606372	0.959655	0.397427	1.04204	0.431546	0.490651
14	CS_5wf_58_C11440_30s	[169, 333]	0.55	75.1712	0.853748	57.857	1.29216	0.230167	0.0216246	0.406889	0.033158	0.276328	0.174045	0.187857	0.0408997	0.465238	0.187243	2.14944	0.865077	0.492744
15	WT_06_1wf_C11440_30	(0, 281)	0.125	69.9804	0.263118	50.014	0.103963	0.285306	0.00267904	0.489205	0.00382649	0.207143	0.00826228	0.216159	0.00296659	0.423188	0.00851133	2.36301	0.0475259	0.0200267
16	CS_1wm_44_C11440_30s	[0, 512]	0.3	75.0784	2.20888	58.4663	0.991595	0.220658	0.0242921	0.392036	0.037695	0.775682	0.254368	0.539762	0.146811	1.34952	0.293282	0.741002	0.161036	0.200192
17	CS_1wm_23_C11440_30s	[60, 256]	0.375	77.7839	1.45209	47.7753	0.835496	0.385605	0.0146888	0.622303	0.0182523	0.611618	0.0705412	0.253333	0.0111237	0.866364	0.0761604	1.15425	0.101468	0.0885587
18	CS_1wf_31_C11440_30s	[55, 276]	0.1	93.5684	1.30331	61.0662	0.803732	0.347288	0.00947995	0.573877	0.0123478	0.267642	0.070132	0.281635	0.043762	0.547885	0.0812424	1.8252	0.270648	0.146383
19	CS_1wf_09_C11440_30s	[159, 377]	0.25	81.0498	3.32477	57.2252	0.676718	0.292798	0.0293678	0.499002	0.0406241	0.189286	0.0627995	0.238696	0.0745744	0.427464	0.105376	2.33938	0.57669	0.257014
20	CS_1wf_49_C11440_30s	[64, 337]	0.425	70.8513	1.04663	49.8745	0.535423	0.295874	0.0148617	0.503986	0.0210265	0.284915	0.0662014	0.220086	0.0693224	0.505259	0.100312	1.97918	0.392938	0.190164
21	CS_1wm_49_C11440_30s	[170, 376]	0.325	61.6658	2.21567	34.4979	1.21747	0.440326	0.0162052	0.686502	0.0181826	0.684828	0.0757432	0.351786	0.0818668	1.04089	0.0726913	0.960714	0.0670919	0.0697279
22	CS_1wm_08_C11440_30s	[109, 305]	0.275	76.1641	1.95682	46.9847	3.53466	0.383126	0.0436762	0.617559	0.0525913	0.76	0.246152	0.339615	0.103319	1.10115	0.298465	0.908138	0.246149	0.276998
23	CS_5wm_27_C11440_30s	[254, 512]	0.25	60.8387	2.89738	39.6768	0.891501	0.346463	0.0323496	0.571842	0.0441869	0.926739	0.279742	0.362955	0.166171	1.27886	0.302072	0.781944	0.184698	0.246087
24	CS_1wf_30_C11440_30s	[121, 303]	0.2	92.719	1.30632	66.4771	1.3895	0.282956	0.0148531	0.485627	0.0210695	0.509342	0.240488	0.271622	0.0421396	0.777703	0.266396	1.28584	0.440455	0.302723
25	CS_5wm_35_C11440_30s	[225, 356]	0.4	62.3287	0.637281	39.142	0.329756	0.371952	0.00752196	0.605499	0.0093973	0.859583	0.0549036	0.381522	0.0369616	1.23891	0.0732025	0.807159	0.0476918	0.0590342
26	CS_5wf_03_C11440_30s	[101, 434]	0.35	83.5936	0.206598	52.8482	0.209855	0.367794	0.00256544	0.600309	0.00324758	0.667414	0.0156261	0.338571	0.00497442	1.00607	0.0175437	0.993965	0.0173326	0.0174131
27	WT_12_1wf_C11440_30	(200, 304)	0.375	73.9866	1.35369	43.7275	0.804703	0.408895	0.010177	0.650492	0.012164	0.248387	0.0107304	0.229098	0.0053184	0.477459	0.0124342	2.09442	0.0545438	0.0259046
28	CS_5wm_36_C11440_30s	[113, 431]	0.55	51.7333	2.43534	32.0682	1.96168	0.379602	0.0344655	0.613919	0.0425138	0.363375	0.141069	0.364359	0.126912	0.730385	0.168965	1.36914	0.316733	0.231459
29	CS_5wf_54_C11440_30s	[190, 452]	0.4	52.1294	0.277355	38.9573	0.674684	0.252627	0.0151991	0.441203	0.0227192	0.503243	0.136675	0.298194	0.0763504	0.807639	0.136114	1.23818	0.208674	0.175631
30	CS_1wm_34_C11440_30s	[0, 307]	0.3	81.424	3.02858	44.6379	1.05884	0.451047	0.0237283	0.698087	0.0256767	0.538382	0.365515	0.307576	0.084514	0.840455	0.420779	1.18983	0.595697	0.614276
31	CS_1wf_22_C11440_30s	[254, 481]	0.35	80.6299	0.978126	55.6856	1.33082	0.309315	0.016593	0.522679	0.023089	0.488816	0.0785513	0.286081	0.0206363	0.77527	0.0847408	1.28987	0.140989	0.110053
32	CS_5wf_06_C11440_30s	[68, 441]	0.3	76.8811	0.671021	58.243	0.671274	0.242431	0.00509004	0.426064	0.00762647	0.3095	0.0339448	0.287143	0.0851589	0.596735	0.0864466	1.67579	0.242765	0.149046
33	CS_1wm_60_C11440_30s	[82, 208]	0.4	65.5137	2.14278	42.1852	0.875144	0.355335	0.0267226	0.583693	0.0353056	0.629265	0.318847	0.246667	0.0713364	0.871818	0.378375	1.14703	0.497818	0.392099
34	CS_1wm_13_C11440_30s	[96, 272]	0.45	66.8559	1.54083	36.7252	0.94946	0.450668	0.00744766	0.698179	0.00821067	0.328019	0.0657779	0.224615	0.0758214	0.552115	0.0912222	1.81122	0.299255	0.158647
35	CS_1wm_57_C11440_30s	[57, 256]	0.25	70.0676	0.120904	40.8346	0.372394	0.417208	0.00567736	0.660321	0.00666081	0.901042	0.211798	0.359348	0.00811659	1.29652	0.125901	0.771294	0.0748976	0.0946621
36	CS_5wf_51_C11440_30s	[254, 512]	0.35	67.4847	0.514669	53.0885	0.473032	0.213287	0.00853687	0.38101	0.0134223	0.138512	0.0258864	0.21512	0.00554151	0.353554	0.0265771	2.82842	0.212616	0.0759346
37	CS_5wm_04_C11440_30s	[101, 210]	0.7	58.844	2.1122	33.9046	1.33132	0.422985	0.0325174	0.665996	0.0378347	0.491111	0.348674	0.308	0.121727	0.810286	0.388756	1.23413	0.592108	0.427205
38	CS_5wm_06_C11440_30s	[200, 427]	0.5	46.3972	1.11603	33.0178	0.664837	0.287958	0.0222687	0.4925	0.0314642	0.330652	0.100128	0.314222	0.134817	0.643333	0.157251	1.5544	0.379945	0.257788
39	WT_5wm_43_C11440_30s	(229, 436)	0.5	56.6384	0.315834	45.8091	0.8977	0.191215	0.0144166	0.345659	0.023334	0.483182	0.0821475	0.41875	0.087178	0.903281	0.110599	1.10707	0.135552	0.121872
40	CS_1wm_32_C11440_30s	[108, 206]	0.7	60.9921	0.662255	33.0044	1.10768	0.458825	0.0186114	0.706783	0.0202483	0.362614	0.121021	0.299186	0.0985413	0.668256	0.161885	1.49643	0.362512	0.224841
41	CS_1wm_39_C11440_30s	[145, 373]	0.4	80.1589	2.47562	50.4242	0.990974	0.370537	0.0170391	0.603486	0.0214667	0.241929	0.0682239	0.185942	0.00860887	0.427464	0.0737977	2.33938	0.403873	0.171623
42	CS_5wm_05_C11440_30s	[0, 353]	0.6	57.6191	3.31641	35.5802	1.14989	0.380878	0.0341658	0.615521	0.0435245	0.760208	0.387146	0.497391	0.366502	1.25935	0.342628	0.794062	0.216039	0.286718
43	CS_5wm_23_C11440_30s	[80, 208]	0.75	56.3357	1.08104	35.6294	1.13609	0.367398	0.0211431	0.599368	0.026771	1.27059	0.623316	0.397188	0.0920762	1.5825	0.5917	0.631912	0.236273	0.351158
44	CS_5wm_37_C11440_30s	[200, 435]	0.3	55.9339	1.39008	32.1088	0.518048	0.425652	0.014943	0.669901	0.0172572	0.769423	0.117263	0.3828	0.0600513	1.1522	0.126831	0.867905	0.0955367	0.111746
45	CS_1wm_24_C11440_30s	[199, 337]	0.475	63.782	1.14451	42.7833	0.80342	0.328981	0.0185811	0.549388	0.0250942	0.374474	0.270644	0.395135	0.15261	0.778378	0.313304	1.28472	0.517112	0.401672
46	CS_5wf_15_C11440_30s	[220, 512]	0.25	66.848	2.88379	51.9105	1.44234	0.222583	0.02602	0.394946	0.0406623	0.364111	0.123501	0.27	0.0972345	0.634091	0.156805	1.57706	0.389993	0.260257
47	CS_1wf_59_C11440_30s	[150, 377]	0.375	71.6466	0.29642	50.7445	0.372669	0.291726	0.00605864	0.498311	0.00855667	0.184803	0.038623	0.202733	0.0326526	0.387733	0.0523087	2.57909	0.347942	0.13949
48	CS_5wf_27_C11440_30s	[121, 381]	0.35	73.9502	1.44136	48.4274	0.280812	0.344868	0.0141552	0.570601	0.0182728	0.706	0.0588558	0.448542	0.0500724	1.15875	0.0768962	0.862999	0.0572697	0.065864
49	CS_1wm_21_C11440_30s	[172, 417]	0.4	50.9636	2.70373	24.2866	0.652432	0.522277	0.0258303	0.771113	0.0239914	0.351778	0.142899	0.287614	0.0313791	0.641591	0.144646	1.55863	0.351391	0.237125
50	CS_5wf_09_C11440_30s	[73, 361]	0.35	62.4324	0.28877	45.7963	0.214147	0.266461	0.00247418	0.461915	0.0036288	0.455	0.0242126	0.287564	0.00815489	0.74359	0.0257191	1.34483	0.0465146	0.0345223
51	CS_5wf_20_C11440_30s	[133, 324]	0.5	65.6132	0.428887	47.3842	0.379196	0.277782	0.00867854	0.478325	0.0125907	0.484737	0.0281431	0.302162	0.0211667	0.786351	0.0386189	1.2717	0.0624549	0.0488846
52	CS_1wm_52_C11440_30s	[112, 404]	0.4	71.2974	1.15764	45.5453	0.365363	0.361026	0.0114616	0.591581	0.0146907	0.363125	0.0759566	0.245745	0.0875128	0.610532	0.107709	1.63792	0.288959	0.176573
53	CS_5wf_46_C11440_30s	[133, 251]	0.05	96.3532	0.551667	66.9763	0.518259	0.304873	0.00576941	0.516765	0.00804826	0.728036	0.113132	0.31037	0.0995074	1.03685	0.157222	0.964458	0.146245	0.151905
54	CS_1wm_30_C11440_30s	[201, 411]	0.4	58.0268	0.961049	32.6082	0.839819	0.437914	0.0166329	0.683783	0.0188457	0.566364	0.0833782	0.325937	0.0123388	0.888906	0.0826961	1.12498	0.104658	0.092917
55	CS_5wm_32_C11440_30s	[159, 512]	0.15	59.289	0.55552	48.1933	0.801545	0.187082	0.0150389	0.338939	0.024429	0.550455	0.116725	0.340156	0.111007	0.886563	0.2058	1.12795	0.261835	0.244273
56	WT_5wm_45_C11440_30s	(150, 405)	0.45	68.6833	0.506536	40.7459	1.11534	0.406692	0.0179512	0.647663	0.0210272	0.459054	0.0779799	0.340278	0.0809573	0.803889	0.0832259	1.24395	0.128785	0.10602
57	CS_5wf_28_C11440_30s	[211, 431]	0.25	89.7502	2.86531	67.1839	1.20849	0.250694	0.0266906	0.437828	0.0399556	0.5525	0.54737	0.318485	0.159357	0.875	0.619545	1.14286	0.809202	1.08692
58	CS_1wf_55_C11440_30s	[130, 369]	0.225	75.1816	2.01942	51.1445	1.06454	0.319468	0.0145312	0.536664	0.0196828	0.168813	0.0529165	0.19981	0.00847345	0.368418	0.0583016	2.71431	0.429536	0.16899
59	CS_5wf_52_C11440_30s	[130, 238]	0.25	90.3628	0.584484	63.5566	0.515581	0.296617	0.00767234	0.505194	0.0107055	0.392386	0.0411412	0.276744	0.0139719	0.667674	0.0468589	1.49774	0.105114	0.0715403
60	CS_5wf_25_C11440_30s	[164, 378]	0.1	79.7701	1.71461	59.5925	1.05777	0.252813	0.0109212	0.441592	0.0163002	0.502308	0.0720919	0.261711	0.0124222	0.767632	0.074133	1.30271	0.125807	0.0975435
61	CS_1wm_35_C11440_30s	[76, 349]	0.425	71.4404	1.81015	46.0394	0.901247	0.355218	0.0179732	0.583933	0.0229767	0.469375	0.197513	0.271026	0.0805763	0.732308	0.175524	1.36555	0.327303	0.25624
62	WT_09_1wf_C11440_30	(261, 402)	0.05	85.9153	4.31673	55.2685	2.18273	0.356105	0.0205159	0.584978	0.0262714	0.259426	0.104858	0.2235	0.0152834	0.482917	0.104512	2.07075	0.448148	0.21329
63	CS_5wf_16_C11440_30s	[88, 384]	0.45	90.3725	0.449743	66.726	0.57942	0.261635	0.00763663	0.454759	0.0112912	0.450476	0.0256536	0.243659	0.00382935	0.693902	0.0260279	1.44112	0.0540559	0.0377217
64	CS_5wm_10_C11440_30s	[0, 402]	0.3	42.2324	0.177024	36.6369	0.487697	0.132474	0.0123187	0.247247	0.0211491	0.436375	0.312266	0.288846	0.075621	0.727179	0.306761	1.37518	0.580119	0.519934
65	CS_5wm_48_C11440_30s	[72, 336]	0.4	66.6625	0.470749	40.7223	0.641766	0.389141	0.0074829	0.626796	0.00922617	1.02136	0.214752	0.345238	0.0843106	1.36476	0.248148	0.732729	0.133228	0.177248
66	CS_5wf_53_C11440_30s	[159, 381]	0.15	67.3698	0.15563	47.7443	0.127675	0.291306	0.00270135	0.497745	0.00383247	0.345306	0.0288453	0.259271	0.00395147	0.604896	0.0300605	1.65318	0.0821553	0.0501009
67	CS_1wf_38_C11440_30s	[134, 303]	0.5	82.8779	1.20376	58.9835	2.25762	0.287932	0.0344202	0.491775	0.049741	0.388556	0.246238	0.266932	0.0729042	0.652045	0.258077	1.53364	0.607007	0.417939
68	CS_1wm_04_C11440_30s	[101, 312]	0.25	65.2388	1.33431	44.4474	0.370624	0.318392	0.0159116	0.535158	0.0220721	0.765769	0.289684	0.3874	0.212655	1.1574	0.290906	0.864006	0.217163	0.26446
69	CS_1wf_29_C11440_30s	[200, 402]	0.175	83.6469	0.187239	52.2442	0.721583	0.375419	0.008597	0.609825	0.0107942	0.203768	0.0164714	0.223015	0.0501992	0.426985	0.0528673	2.342	0.289976	0.126628
70	CS_5wm_08_C11440_30s	[183, 377]	0.5	67.8039	3.56304	40.466	2.37263	0.401689	0.0453379	0.639968	0.0556811	0.557031	0.31859	0.365645	0.351533	0.918548	0.475715	1.08867	0.563823	0.522764
71	CS_5wm_09_C11440_30s	[92, 353]	0.5	52.5775	1.04849	32.3997	0.508366	0.383526	0.015808	0.61971	0.0198131	0.552581	0.261068	0.4115	0.148151	0.953167	0.26227	1.04913	0.288677	0.252183
72	CS_1wm_55_C11440_30s	[139, 316]	0.525	58.1725	0.59953	37.357	0.422124	0.357763	0.00929142	0.587446	0.0118234	0.759792	0.123748	0.43587	0.0233895	1.19391	0.127875	0.837582	0.08971	0.109764
73	CS_1wm_15_C11440_30s	[105, 306]	0.3	63.6267	0.753464	39.6648	0.304076	0.376553	0.00535549	0.611285	0.00664234	0.201757	0.04531	0.199384	0.0102685	0.400822	0.0492618	2.49487	0.306625	0.118703
74	CS_5wm_33_C11440_30s	[303, 438]	0.3	71.5623	1.044	52.7188	0.448268	0.263146	0.0132533	0.45687	0.020012	0.287604	0.0842243	0.327553	0.0965626	0.617447	0.117871	1.61957	0.309176	0.196451
75	CS_1wf_58_C11440_30s	[146, 390]	0.275	75.4584	0.403869	50.9229	0.325379	0.325129	0.00611122	0.544511	0.00824968	0.290656	0.0235302	0.193	0.00355903	0.483917	0.0251842	2.06647	0.107544	0.052467
76	WT_5wm_39_C11440_30s	(167, 335)	0.35	55.7153	2.49434	43.8306	1.00932	0.211895	0.0361088	0.377586	0.0582729	1.05964	0.57277	0.870769	0.27426	1.88692	0.682398	0.529963	0.191659	0.337821
77	CS_5wf_47_C11440_30s	[67, 347]	0.45	73.7956	0.607104	52.4079	0.605819	0.289814	0.00681123	0.495589	0.00973854	0.385652	0.0387804	0.251222	0.0255638	0.636667	0.0396793	1.57068	0.0978903	0.0619989
78	CS_5wm_34_C11440_30s	[109, 311]	0.5	65.7563	0.451257	39.0003	1.37585	0.406886	0.0207847	0.647784	0.0246347	1.402	0.148119	0.562143	0.165688	1.96714	0.177016	0.508351	0.0457447	0.0907775
79	CS_5wf_02_C11440_30s	[76, 394]	0.5	77.4948	0.853553	53.8951	0.635263	0.304498	0.00749538	0.516221	0.0104623	0.425814	0.0259904	0.259524	0.100326	0.686786	0.105112	1.45606	0.222849	0.156301
80	CS_5wm_44_C11440_30s	[200, 390]	0.4	41.9493	3.44591	27.5978	1.94025	0.339147	0.0539335	0.560364	0.0700666	0.469412	0.321414	0.389394	0.163697	0.870606	0.374185	1.14863	0.493678	0.440218
81	CS_5wf_23_C11440_30s	[72, 324]	0.4	79.8153	0.271646	54.6731	0.916789	0.314999	0.0115742	0.53064	0.0157347	0.641129	0.138184	0.328	0.0879545	0.9735	0.175993	1.02722	0.185705	0.178221
82	WT_5wm_38_C11440_30s	(0, 398)	0.45	65.7163	3.38262	34.2783	1.20603	0.476713	0.0370031	0.724801	0.0390779	1.61115	0.634454	0.683333	0.242266	2.285	0.785008	0.437637	0.150349	0.324719
83	CS_1wf_08_C11440_30s	[84, 433]	0.425	72.0626	2.41761	45.0983	1.26186	0.373549	0.0253757	0.606915	0.0317407	0.298796	0.12096	0.251981	0.0265703	0.550849	0.129756	1.81538	0.427623	0.242534
84	CS_5wf_42_C11440_30s	[217, 512]	0.45	72.1587	0.468132	53.1557	0.834563	0.263329	0.0119802	0.457172	0.0176469	0.49325	0.0331766	0.234103	0.0165201	0.726282	0.0315562	1.37688	0.0598238	0.0435258
85	CS_5wm_01_C11440_30s	[145, 348]	0.05	80.0273	2.0896	61.2027	0.59545	0.234746	0.0199146	0.41399	0.0304775	1.94045	0.549593	0.8425	0.223945	2.8375	0.592061	0.352423	0.0735351	0.193801
86	CS_1wf_43_C11440_30s	[226, 369]	0.35	67.6306	4.18154	41.7864	2.05916	0.381402	0.019072	0.616972	0.0235901	0.388837	0.0432386	0.299286	0.0182108	0.688214	0.0495434	1.45304	0.104602	0.0725911
87	CS_5wm_55_C11440_30s	[289, 442]	0.7	54.0294	2.45492	35.5866	0.888076	0.340096	0.0322004	0.563489	0.043704	0.381053	0.169163	0.370135	0.054531	0.749324	0.190771	1.33454	0.33976	0.259552
88	CS_5wm_60_C11440_30s	[75, 328]	0.5	71.3033	1.77935	54.9039	1.64316	0.229442	0.0319122	0.405222	0.049399	0.380476	0.38726	0.315244	0.150446	0.702439	0.417352	1.42361	0.845835	0.738677
89	CS_1wf_53_C11440_30s	[150, 348]	0.2	76.6778	0.466149	50.2158	0.289821	0.345095	0.00375087	0.571085	0.00491487	0.235234	0.0195142	0.227619	0.0585191	0.461905	0.0630157	2.16495	0.295355	0.140035
90	CS_1wf_07_C11440_30s	[180, 434]	0.475	88.2948	0.184297	53.1065	0.195102	0.39853	0.00229858	0.638229	0.00276246	0.557794	0.0302731	0.290606	0.00547135	0.848939	0.032069	1.17794	0.0444971	0.0375076
91	CS_1wf_06_C11440_30s	[63, 307]	0.3	82.1886	1.8808	56.4397	2.44798	0.313011	0.0321118	0.527015	0.0448562	0.435357	0.226178	0.251829	0.0298524	0.690854	0.22978	1.44748	0.481437	0.392786
92	WT_11_1wf_C11440_30	(270, 410)	0.35	75.5702	0.820138	43.6786	0.324579	0.421947	0.00739388	0.6658	0.00861619	0.282672	0.0359264	0.226754	0.0058107	0.51	0.0392585	1.96078	0.150936	0.0769774
93	CS_1wm_18_C11440_30s	[168, 326]	0.725	53.6671	0.535817	40.0068	0.395999	0.254444	0.0118341	0.444006	0.0176412	0.0925	0.00676723	0.177615	0.025129	0.270046	0.0255893	3.70307	0.350901	0.0947753
94	CS_5wf_12_C11440_30s	[256, 384]	0.8	56.8725	0.164007	43.5434	0.204237	0.234364	0.00377865	0.413788	0.00578446	0.390349	0.0343104	0.294167	0.0186419	0.684762	0.035773	1.46036	0.0762914	0.0518449
95	CS_1wm_31_C11440_30s	[126, 385]	0.3	67.0977	3.2078	43.4094	1.01096	0.351913	0.0270691	0.579251	0.03614	0.3303	0.166329	0.257449	0.0676284	0.589388	0.174507	1.69668	0.502355	0.281463
96	CS_5wf_55_C11440_30s	[237, 448]	0.3	68	1.54993	42.7594	1.17753	0.371066	0.0154406	0.604203	0.0195168	0.6045	0.0867213	0.365345	0.0205498	0.971552	0.0813157	1.02928	0.0861475	0.0834007
97	CS_1wm_25_C11440_30s	[88, 392]	0.375	72.9105	2.46376	37.5181	0.768699	0.484802	0.0213854	0.734114	0.022966	0.371486	0.122258	0.420833	0.212278	0.786667	0.217588	1.27119	0.351603	0.314206
98	CS_1wm_20_C11440_30s	[188, 366]	0.05	82.5024	2.0769	52.2095	1.11684	0.366707	0.0229895	0.598412	0.0294181	0.3468	0.241358	0.235408	0.016716	0.58449	0.252807	1.71089	0.740007	0.486168
99	WT_04_1wf_C11440_30	(126, 512)	0.3	76.6704	0.851474	43.4411	0.700404	0.433326	0.0116395	0.678745	0.0134602	0.493108	0.0280046	0.304306	0.123649	0.797639	0.129387	1.2537	0.203366	0.164824
100	CS_1wf_10_C11440_30s	[69, 406]	0.375	76.2172	0.618113	51.8272	0.96879	0.320029	0.0100611	0.537538	0.0137073	0.146512	0.0161402	0.195412	0.037949	0.341882	0.0417695	2.92498	0.35736	0.124685
101	CS_5wm_16_C11440_30s	[101, 337]	0.5	50.729	1.28898	37.6907	0.72971	0.256748	0.0158553	0.447326	0.0235273	0.551786	0.347404	0.476852	0.289623	1.02519	0.288603	0.975434	0.274597	0.278843
102	WT_01_1wf_C11440_30	(150, 410)	0.375	74.7033	0.655594	50.2199	0.205958	0.327696	0.00599772	0.547971	0.00803654	0.338137	0.0151774	0.2486	0.00361109	0.5862	0.0155743	1.7059	0.0453229	0.0265095
103	CS_1wm_06_C11440_30s	[200, 353]	0.725	62.2894	1.44293	41.4833	0.749753	0.333632	0.0207201	0.555524	0.0275589	0.439	0.198281	0.290769	0.0452562	0.739744	0.19483	1.35182	0.356036	0.265075
104	WT_5wm_46_C11440_30s	(0, 311)	0.325	56.4645	1.79014	38.7575	0.600958	0.31277	0.0279497	0.526934	0.0394732	0.665	0.746499	0.467609	0.198455	1.14565	0.84449	0.872865	0.643412	1.12599
105	CS_5wm_30_C11440_30s	[0, 512]	0.25	58.4914	1.60877	43.2751	1.04979	0.259612	0.0263551	0.451131	0.0391174	0.529394	0.48324	0.374844	0.0791605	0.908594	0.485316	1.1006	0.587875	0.667101
106	CS_1wm_11_C11440_30s	[113, 408]	0.475	66.7838	0.426113	42.5596	0.383936	0.362691	0.0076892	0.593778	0.00976503	0.215672	0.0229193	0.224621	0.00854181	0.439924	0.0234115	2.27312	0.120969	0.0532081
107	CS_1wf_51_C11440_30s	[233, 442]	0.325	61.7032	1.972	41.6898	0.656341	0.323902	0.0160717	0.542633	0.0214669	0.463846	0.124938	0.292763	0.0268695	0.7575	0.127742	1.32013	0.222623	0.175591
108	CS_1wf_60_C11440_30s	[121, 320]	0.475	83.9142	0.784548	54.9376	1.40166	0.345341	0.0143873	0.571215	0.0184397	0.453375	0.0253078	0.280256	0.00775826	0.733205	0.0275143	1.36387	0.0511808	0.0376908
109	WT_10_1wf_C11440_30	(101, 270)	0.125	71.1853	0.938697	49.2371	0.774266	0.308183	0.0152773	0.521156	0.0212832	0.222231	0.0870147	0.237656	0.0499998	0.460547	0.0992476	2.17133	0.467921	0.208942
110	CS_5wf_07_C11440_30s	[129, 352]	0.1	87.5312	5.84447	58.0701	1.17062	0.333642	0.045898	0.55386	0.0613122	0.409268	0.260046	0.293125	0.0250671	0.69475	0.271422	1.43937	0.562326	0.424097
111	CS_1wm_17_C11440_30s	[249, 512]	0.3	58.0853	1.47928	30.9943	0.924722	0.466052	0.0207973	0.714467	0.022109	0.371463	0.104749	0.347	0.0859927	0.718	0.140311	1.39276	0.272172	0.194202
112	CS_5wf_17_C11440_30s	[146, 417]	0.4	54.8502	0.473492	37.9838	0.602137	0.307438	0.0130676	0.520188	0.0184344	0.442838	0.0782368	0.361111	0.106609	0.804306	0.108026	1.24331	0.166989	0.13894
113	CS_5wf_39_C11440_30s	[171, 291]	0.25	88.7717	0.969165	60.8744	1.08667	0.314172	0.0147262	0.529424	0.0201461	0.763519	0.138248	0.351154	0.123983	1.11154	0.199763	0.899654	0.161684	0.176782
114	CS_1wm_19_C11440_30s	[0, 512]	0.3	62.4174	1.37178	39.3573	0.592401	0.369199	0.0147177	0.601873	0.0187322	0.192463	0.0518564	0.250833	0.0987251	0.442727	0.116568	2.25873	0.59471	0.284311
115	CS_1wm_02_C11440_30s	[200, 351]	0.475	63.3347	1.14026	36.248	0.464091	0.427473	0.0134856	0.672031	0.0155985	0.447368	0.275198	0.325676	0.126005	0.762297	0.25227	1.31182	0.434127	0.327623
116	CS_5wm_03_C11440_30s	[0, 512]	0.1	65.3184	2.74167	41.2157	0.545933	0.367936	0.0267236	0.599781	0.0346655	0.6425	0.320525	0.342069	0.090005	0.976379	0.313206	1.02419	0.328544	0.327965
117	CS_5wf_40_C11440_30s	[86, 259]	0.2	87.6798	1.06997	63.8334	1.6209	0.271711	0.0246489	0.468988	0.0336774	0.805962	0.166086	0.342	0.0271293	1.1504	0.178196	0.869263	0.134648	0.159817
118	CS_1wf_04_C11440_30s	[225, 423]	0.7	67.4907	0.433331	48.0189	0.775859	0.288453	0.0138727	0.493509	0.0194479	0.22822	0.0307775	0.274483	0.0634204	0.501724	0.0726562	1.99313	0.288631	0.14678
119	CS_1wm_16_C11440_30s	(150, 512)	0.425	53.7049	0.966833	32.4398	0.825446	0.395766	0.0188703	0.634546	0.0229113	0.275943	0.094495	0.282404	0.114255	0.561827	0.136766	1.77991	0.433283	0.246425
120	CS_5wm_52_C11440_30s	[240, 386]	0.75	75.1769	2.81186	48.9939	2.6234	0.346661	0.0529639	0.570343	0.0711323	0.302979	0.292212	0.305217	0.0968412	0.59587	0.295861	1.67822	0.833271	0.591723
121	CS_5wm_25_C11440_30s	[0, 254]	0.6	63.1376	1.73911	44.1972	1.18376	0.299707	0.0196425	0.509203	0.0271873	0.575303	0.330773	0.323125	0.0507714	0.894062	0.344507	1.11849	0.430985	0.42013
122	CS_1wm_46_C11440_30s	[93, 255]	0.525	50.1063	0.414156	34.6601	0.43153	0.30823	0.00967926	0.52136	0.0133254	0.92275	0.480665	0.472368	0.156132	1.36711	0.391745	0.731473	0.209604	0.290181
123	CS_1wf_25_C11440_30s	[200, 377]	0.575	54.0847	0.50493	34.5033	1.20075	0.362041	0.0217071	0.592537	0.0277461	0.318269	0.123018	0.240882	0.04646	0.555196	0.121106	1.80117	0.392891	0.212466
124	CS_1wm_53_C11440_30s	[127, 265]	0.425	70.1661	1.05864	42.3078	0.574264	0.39694	0.0098368	0.636222	0.0119551	0.273276	0.035605	0.232982	0.00667935	0.507018	0.0376952	1.97232	0.146636	0.0739122
125	WT_5wm_47_C11440_30s	(68, 270)	0.425	61.738	0.605896	45.8978	0.373442	0.256513	0.00836077	0.447157	0.0124783	0.521176	0.0375159	0.350303	0.0121817	0.871212	0.0417429	1.14783	0.0549965	0.0477062
126	CS_1wf_47_C11440_30s	[171, 303]	0.2	86.6128	0.329252	59.0128	0.421026	0.318651	0.00533356	0.535735	0.00721763	0.425488	0.0633496	0.28175	0.0258735	0.70575	0.0745952	1.41693	0.149764	0.105435
127	CS_1wm_03_C11440_30s	[113, 226]	0.5	80.8479	1.0576	47.1478	1.28233	0.416679	0.0193721	0.659362	0.0228525	0.756429	0.142853	0.289815	0.0426328	1.04333	0.146793	0.958466	0.134852	0.13719
128	CS_5wm_53_C11440_30s	[101, 357]	0.55	57.1469	0.365712	35.4122	0.545064	0.380311	0.0099011	0.615887	0.0123045	1.46969	1.1588	0.424667	0.0391777	1.80667	1.15644	0.553506	0.354296	0.784027
129	CS_5wf_43_C11440_30s	[180, 373]	0.3	68.5301	1.34152	51.1368	0.557641	0.253497	0.017675	0.442421	0.026526	0.359271	0.0520115	0.255	0.0895913	0.612979	0.10084	1.63138	0.268376	0.165312
130	CS_1wm_54_C11440_30s	[73, 372]	0.425	72.5845	0.723649	45.9869	0.665927	0.366432	0.00709917	0.598541	0.00903697	0.749074	0.130562	0.336731	0.0801914	1.08808	0.16724	0.919053	0.141261	0.149991
131	CS_5wm_28_C11440_30s	[129, 340]	0.6	39.1464	1.38159	29.1986	0.321121	0.253269	0.0253546	0.441749	0.0378214	0.26717	0.0171703	0.293846	0.0109023	0.560962	0.0184505	1.78265	0.058633	0.0326558
132	CS_5wf_41_C11440_30s	[85, 244]	0.3	70.5216	0.592166	53.375	0.81708	0.243114	0.0115243	0.426992	0.0174025	0.207222	0.0622321	0.200845	0.0427734	0.408521	0.0794319	2.44785	0.475955	0.211818
133	CS_1wm_22_C11440_30s	[179, 346]	0.3	78.0986	2.85595	41.9327	1.28686	0.46198	0.0340481	0.709376	0.039992	0.307	0.104192	0.433205	0.115351	0.738718	0.192915	1.3537	0.353516	0.26247
134	CS_1wm_50_C11440_30s	[0, 512]	0.3	76.262	2.69995	48.2219	2.15671	0.367286	0.0283535	0.598869	0.0363742	0.479	0.0790427	0.265897	0.00758472	0.745	0.0819162	1.34228	0.14759	0.112988
135	CS_5wf_13_C11440_30s	[208, 380]	0.15	78.54	2.80385	58.8762	1.57826	0.249398	0.0334827	0.435475	0.0512739	0.249848	0.150527	0.195462	0.0774037	0.443923	0.153381	2.25264	0.778317	0.319544
136	CS_1wf_18_C11440_30s	[224, 406]	0.35	78.0189	1.05362	56.0445	0.407001	0.281523	0.011137	0.483667	0.015965	0.142556	0.0097822	0.186348	0.0337769	0.32882	0.0352919	3.04118	0.326406	0.106945
137	CS_5wf_21_C11440_30s	[113, 347]	0.3	101.188	0.932543	69.4803	0.498345	0.313279	0.0091868	0.52833	0.0126976	0.575323	0.036697	0.368333	0.152082	0.943667	0.142589	1.0597	0.160121	0.153321
138	CS_5wf_05_C11440_30s	[133, 401]	0.5	65.288	1.16435	35.1803	0.714401	0.461086	0.0099831	0.709472	0.0108061	0.399878	0.231107	0.312125	0.0425277	0.699125	0.243482	1.43036	0.498147	0.347832
139	CS_1wm_45_C11440_30s	[0, 512]	0.3	75.0132	0.898346	46.9276	1.09102	0.374386	0.0137255	0.608419	0.0171514	0.744808	0.135068	0.3828	0.112152	1.1376	0.172761	0.879044	0.133495	0.157055
140	CS_1wm_37_C11440_30s	[176, 308]	0.5	72.225	1.2554	39.3978	1.52397	0.454202	0.0265948	0.701397	0.0299903	0.646897	0.102591	0.366964	0.167686	1.01625	0.200662	0.98401	0.194296	0.192482
141	CS_5wm_42_C11440_30s	[200, 421]	0.45	53.1986	0.505747	30.6883	0.98376	0.422968	0.0225648	0.666525	0.0261645	1.06342	0.693251	0.493889	0.0856439	1.51139	0.73904	0.661643	0.323531	0.397868
142	CS_1wm_41_C11440_30s	[0, 512]	0.3	85.5931	0.487089	62.1877	1.30097	0.27346	0.0141278	0.47194	0.020558	0.265167	0.079062	0.225424	0.0248263	0.490169	0.0882358	2.04011	0.367242	0.18193
143	CS_5wf_31_C11440_30s	[172, 512]	0.4	78.252	0.518251	55.7087	0.615627	0.288094	0.00528422	0.493161	0.00755974	0.5625	0.0404918	0.253	0.0257238	0.815143	0.0490988	1.22678	0.073893	0.0598766
144	CS_5wf_04_C11440_30s	[45, 251]	0.4	76.3186	1.43453	55.2827	1.1436	0.275509	0.0147768	0.474895	0.021402	0.300965	0.0495102	0.219286	0.00847415	0.519911	0.049285	1.92341	0.18233	0.095699
145	CS_5wf_44_C11440_30s	[156, 344]	0.45	93.4047	0.55509	64.6341	0.525684	0.307968	0.0094488	0.521002	0.0132372	0.43093	0.114913	0.250714	0.00979379	0.679524	0.124005	1.47162	0.268552	0.173433
146	CS_1wm_43_C11440_30s	[139, 421]	0.3	60.8126	2.13405	40.0312	1.23643	0.340915	0.0306908	0.564665	0.0401638	0.171513	0.134122	0.2142	0.100273	0.383733	0.181224	2.60598	1.23071	0.614318
147	CS_5wf_26_C11440_30s	[90, 217]	0.4	78.9522	1.32166	53.251	0.685661	0.325268	0.0174503	0.544433	0.0240118	0.514342	0.175994	0.258514	0.126672	0.772838	0.238003	1.29393	0.398479	0.311115
148	CS_5wf_35_C11440_30s	[133, 408]	0.3	83.9134	1.27141	58.7485	1.21143	0.299811	0.0145151	0.509524	0.0202172	0.451184	0.0820497	0.317162	0.071116	0.77027	0.0907324	1.29825	0.152924	0.114851
149	CS_5wf_32_C11440_30s	[283, 512]	0.45	62.1296	0.632352	47.9458	0.166329	0.228223	0.00745398	0.404304	0.0115149	0.374063	0.0235553	0.250106	0.0157267	0.62383	0.0326199	1.603	0.0838205	0.0521918
150	CS_1wm_38_C11440_30s	[145, 396]	0.3	71.6957	0.216259	53.45	0.833618	0.254468	0.0127338	0.444019	0.0191317	0.286964	0.0215199	0.234455	0.00492422	0.521273	0.0233787	1.91838	0.0860379	0.0445308
151	CS_5wm_12_C11440_30s	[171, 364]	0.5	63.6029	1.79176	43.6488	0.300781	0.313217	0.0188153	0.527974	0.0260316	0.8214	0.208358	0.373542	0.0859564	1.20333	0.222128	0.831025	0.153402	0.177348
152	WT_08_1wf_C11440_30	(0, 299)	0.4	80.5069	0.237435	46.2649	0.273891	0.425328	0.0034361	0.66974	0.00395221	0.344457	0.0346446	0.296222	0.0941403	0.640889	0.0953548	1.56033	0.232155	0.151357
153	WT_05_1wf_C11440_30	(120, 306)	0.275	81.9745	0.335771	47.1026	0.184157	0.425391	0.00280271	0.669817	0.00322371	0.175203	0.0048934	0.228082	0.0470036	0.403356	0.0465013	2.4792	0.285816	0.116253
154	CS_5wm_43_C11440_30s	[88, 414]	0.35	67.1173	0.964043	39.5275	0.791994	0.410908	0.0159283	0.652717	0.0185756	1.76958	0.595495	0.709545	0.289077	2.62545	0.289894	0.380886	0.0420562	0.111928
155	CS_5wf_34_C11440_30s	[0, 287]	0.45	71.5324	0.852856	54.1732	0.431252	0.242544	0.0124457	0.426105	0.0189006	0.431316	0.0314702	0.332973	0.0277649	0.764459	0.0466265	1.30811	0.0797855	0.0605539
156	WT_5wm_41_C11440_30s	(113, 258)	0.525	57.9685	1.91487	41.5365	1.4781	0.282807	0.0322566	0.484594	0.0461802	0.372283	0.123309	0.257444	0.0968023	0.631667	0.113735	1.58311	0.285047	0.174976
157	CS_1wf_57_C11440_30s	[101, 394]	0.25	76.6711	0.414858	53.3257	0.224176	0.304472	0.00398408	0.516225	0.00553851	0.53027	0.0354497	0.269583	0.00802557	0.799861	0.0356971	1.25022	0.0557962	0.0443443
158	WT_03_1wf_C11440_30	(0, 373)	0.425	67.7801	0.977934	43.1906	0.528847	0.362723	0.00731176	0.593824	0.00932134	0.401333	0.0158254	0.260568	0.0960836	0.661364	0.0943119	1.51203	0.215618	0.14622
159	CS_1wm_33_C11440_30s	[247, 512]	0.4	68.6981	0.448121	35.4101	0.696621	0.484514	0.0115755	0.73414	0.0120796	0.598548	0.303656	0.317833	0.118987	0.9145	0.330863	1.09349	0.395623	0.359634
160	WT_07_1wf_C11440_30	(137, 266)	0.1	86.2785	0.498443	51.9008	0.438415	0.398412	0.00773021	0.638032	0.00933973	0.422791	0.14477	0.263214	0.00722277	0.688571	0.15099	1.45228	0.318456	0.199327
161	CS_5wf_57_C11440_30s	[125, 312]	0.25	82.0363	0.318946	59.8043	0.199028	0.270991	0.00371738	0.468532	0.00541424	0.406023	0.0202142	0.261163	0.00579065	0.666628	0.0235441	1.50009	0.0529805	0.0359453
162	CS_5wf_59_C11440_30s	[264, 391]	0.45	63.7045	0.880301	47.4714	1.37657	0.254721	0.0226561	0.444046	0.0341909	0.394205	0.0988395	0.269767	0.0410467	0.665116	0.0889571	1.5035	0.201088	0.135812
163	CS_1wm_51_C11440_30s	[0, 512]	0.3	72.0823	1.59396	50.1461	1.24953	0.303835	0.0272075	0.514613	0.0381619	0.468214	0.0752442	0.23878	0.0126771	0.70561	0.073478	1.41721	0.14758	0.105724
164	CS_1wf_26_C11440_30s	[203, 320]	0.175	83.6027	0.38393	57.4287	0.577504	0.313075	0.0062975	0.528095	0.00865713	0.246143	0.00687498	0.17971	0.00305553	0.42587	0.00680774	2.34814	0.0375361	0.0160182
165	CS_5wf_24_C11440_30s	[254, 364]	0.4	70.1616	0.580752	48.4151	0.696662	0.309952	0.00795783	0.523771	0.0108421	0.711897	0.053505	0.307679	0.00589827	1.01929	0.0551089	0.981079	0.0530432	0.0535038
166	WT_15_1wf_C11440_30	(361, 464)	0.325	71.4413	1.17183	46.7532	0.834991	0.345467	0.0125692	0.571429	0.0164933	0.124663	0.025507	0.160874	0.0328754	0.286019	0.0443199	3.49627	0.541761	0.152827
167	CS_1wf_54_C11440_30s	[248, 402]	0.625	54.0106	0.88219	28.6424	0.634896	0.46953	0.0152363	0.71837	0.016176	0.377386	0.144778	0.29	0.0163181	0.669535	0.157738	1.49357	0.351876	0.244555
168	WT_14_1wf_C11440_30	(219, 324)	0.425	94.0839	2.07624	50.3315	0.342418	0.464768	0.0127801	0.713363	0.013903	0.143286	0.0259838	0.140385	0.0386969	0.283413	0.0472324	3.52841	0.588029	0.16287
169	CS_1wm_47_C11440_30s	[275, 377]	0.55	53.6915	2.21672	33.8594	1.58389	0.36854	0.0357497	0.59998	0.045096	0.44	0.146515	0.324474	0.0919295	0.765395	0.200923	1.30652	0.342973	0.242808
170	CS_1wm_27_C11440_30s	[111, 370]	0.45	67.3745	1.83306	38.0946	0.297155	0.434291	0.0110213	0.679852	0.0121918	1.43091	0.0843105	0.4335	0.0383438	1.8735	0.0810262	0.53376	0.0230844	0.043214
171	CS_1wm_14_C11440_30s	[96, 378]	0.45	72.2779	0.621942	44.8606	1.01358	0.379331	0.0130436	0.6146	0.0160557	0.714	0.136531	0.286034	0.021551	1.00448	0.14426	0.995537	0.142975	0.147204
172	CS_5wm_26_C11440_30s	[0, 249]	0.55	60.7861	1.47812	44.3315	1.65117	0.269748	0.0424342	0.464932	0.0618305	0.8644	0.107576	0.329792	0.0140297	1.19896	0.109049	0.834057	0.0758599	0.089752
173	CS_1wf_50_C11440_30s	[0, 207]	0.35	80.5743	0.210165	55.4291	0.260035	0.312071	0.00340149	0.526742	0.00468025	0.215676	0.00810923	0.185616	0.00421553	0.401507	0.00774972	2.49062	0.0480729	0.0193743
174	CS_5wm_45_C11440_30s	[78, 423]	0.4	62.6504	2.8708	43.6269	0.720074	0.302282	0.0317172	0.512184	0.0463951	0.392273	0.128887	0.277209	0.0493363	0.669419	0.098908	1.49383	0.220717	0.152166
175	CS_1wf_05_C11440_30s	[134, 328]	0.325	104.826	0.336646	69.6459	1.48786	0.335594	0.0146147	0.55835	0.0199095	0.731071	0.0856421	0.287593	0.0233876	1.01944	0.107646	0.980926	0.103579	0.10252
176	WT_5wm_42_C11440_30s	(101, 353)	0.45	47.1981	0.383514	34.8275	0.136112	0.262062	0.00543409	0.455418	0.00804604	0.193701	0.0465247	0.19	0.0456532	0.383355	0.022861	2.60855	0.155558	0.0601604

## Sheet: TopFeatures
Feature	Importance
Mean EF-Mean SI	0.0593687
Mean EF/Mean SI	0.0375529
Mean FS/Mean SI	0.0339982
Mean FS-Mean SI	0.0315463
STD FS/STD EF	0.0187596
Mean SI/DD_SD_Diff	0.0184874
Mean EF/Mean HP	0.0168352
Mean DI/DD_SD_Diff	0.016007
Mean EF-STD SI	0.0155115
Mean FS-Mean DI	0.013605
STD DD-DD_SD_Diff	0.012569
Mean FS-STD EF	0.0116424
STD HP-DD_SD_Diff	0.0114742
Mean HP/DD_SD_Diff	0.0111853
Mean EF-Mean HP	0.0106417
Mean FS-STD HP	0.0102635
Mean FS-STD SI	0.00932794
Mean EF-STD HP	0.00922212
Mean SI	0.00910711
STD FS-Mean EF	0.00909791
Mean SI-DD_SD_Diff	0.00903063
Mean FS/Mean EF	0.00871203
Mean FS-Mean HP	0.00802347
Mean DI-DD_SD_Diff	0.00775584
Mean EF-STD EF	0.0063595
Mean FS-Mean EF	0.00620856
Mean SD/Mean FS	0.00619186
Mean FS/Mean HP	0.00590096
Mean EF/Mean DI	0.0058174
Mean SD/DD_SD_Diff	0.00548133
Mean DD:/DD_SD_Diff	0.00511007
Mean HP-DD_SD_Diff	0.00507852
STD HP/Mean HR	0.00490567
Mean HR-DD_SD_Diff	0.00484663
STD DI/DD_SD_Diff	0.00480726
Mean DD:/Mean SD	0.00480211
Mean FS	0.00469242
Mean DI-Mean HP	0.00450425
Mean FS-DD_SD_Diff	0.00444439
Mean SI-Mean HP	0.00440456
Mean EF-STD DI	0.00437731
STD EF-STD DI	0.00431609
Mean EF-Mean DI	0.00427684
Mean SD/Mean EF	0.00415728
Mean DI-Mean SI	0.00411627
Logits_Threshold-Mean FS	0.00392457
Mean SD-DD_SD_Diff	0.00390564
Mean DI-Mean HR	0.00387928
STD HR-DD_SD_Diff	0.00387741
STD HP/Mean AI	0.00384886
Mean FS/Mean DI	0.0038022
STD EF/Mean HR	0.00378151
STD FS-DD_SD_Diff	0.00369836
STD SI-STD HP	0.00358745
STD SI/Mean AI	0.00358519
STD SD-STD SI	0.00357771
STD SI/Mean HP	0.00350367
Mean SD-HP/AI	0.00347525
Logits_Threshold/Mean FS	0.00344004
Logits_Threshold-Mean DI	0.00340541
STD SD/Mean DI	0.00340165
STD HR/Mean AI	0.00339233
Mean DD:-Mean SD	0.00337352
Mean AI-DD_SD_Diff	0.00336513
STD EF-DD_SD_Diff	0.00336429
Logits_Threshold/DD_SD_Diff	0.00335185
STD SI-Mean HR	0.00332044
STD SI-DD_SD_Diff	0.00330993
STD FS-Mean SI	0.00327875
Mean HR-STD HR	0.00327286
Mean DD:-STD HR	0.00319712
Logits_Threshold/Mean EF	0.00304178
STD SD-DD_SD_Diff	0.00301783
Unnamed: 0/STD EF	0.00298193
Mean HR	0.00296915
STD FS/DD_SD_Diff	0.00296321
Mean FS/STD DI	0.00286116
Logits_Threshold/Mean HP	0.0028457
Unnamed: 0-DD_SD_Diff	0.00283684
Mean SD-Mean AI	0.00277664
Logits_Threshold-Mean SI	0.00276834
Mean FS/STD SI	0.00276102
Mean FS-STD DI	0.00275478
Logits_Threshold-Mean EF	0.00272985
Unnamed: 0-Mean DD:	0.00272502
STD FS-STD DI	0.00269464
Mean DD:/Mean EF	0.00265245
Mean EF/STD SI	0.00263865
Mean SD/Mean SI	0.0026263
STD DI-DD_SD_Diff	0.00257419
Mean DI-Mean AI	0.00256045
STD DI-STD SI	0.0025508
Mean SD/STD DI	0.00253931
STD DD-Mean HR	0.0025006
DD_SD_Diff	0.00245287
Mean SD-STD FS	0.00244019
Unnamed: 0-Mean DI	0.00238338
Mean FS-STD FS	0.00236253
Mean HP/HP/AI	0.00234394
STD FS-Mean HP	0.00232857
STD DI/Mean HR	0.00232064
STD FS-STD EF	0.0023161
STD FS-STD SI	0.00229529
STD EF/STD HR	0.00228987
STD HR-Mean AI	0.00228488
Mean SI-Mean HR	0.00228205
Mean EF-DD_SD_Diff	0.00224757
STD HP-Mean HR	0.00220327
STD DI-Mean HP	0.0021965
STD SD-Mean HR	0.00216285
Mean DI/HP/AI	0.00215219
Mean DD:/Mean AI	0.00214974
DD_SD_Diff/HP/AI	0.00214718
STD DI	0.00207188
Mean DI/STD HR	0.0020353
STD FS/Mean EF	0.00201018
STD SI/STD HP	0.0019858
Unnamed: 0/DD_SD_Diff	0.00197769
Logits_Threshold-STD HP	0.00197142
STD SD-STD FS	0.00196261
Unnamed: 0/Mean HP	0.00195842
Mean EF	0.00195615
STD EF/STD SI	0.00194661
Unnamed: 0-HP/AI	0.00193336
STD HP-HP/AI	0.00192748
Mean SD	0.00190453
Unnamed: 0/STD SD	0.00185355
STD DD-STD HP	0.00181773
STD DI/Mean SI	0.00180997
STD FS/Mean SI	0.00178464
Unnamed: 0/Mean SD	0.00177483
Mean DD:-STD HP	0.00176948
STD SD/Mean SI	0.00176644
Logits_Threshold-Mean HR	0.00174538
STD DD-Mean DI	0.0017439
Mean FS-STD HR	0.00173872
Mean SD-Mean FS	0.00173076
STD SD/STD EF	0.00169884
STD SD-Mean FS	0.00169575
STD EF-Mean SI	0.00166188
Mean HP-Mean HR	0.00165823
Mean FS/Mean AI	0.00164707
STD SI-STD HR	0.00164646
Mean SD-STD SI	0.00164091
Logits_Threshold-STD DD	0.00163982
STD SD/STD FS	0.00163105
Mean DD:/STD SI	0.00162697
Mean DI	0.00162324
STD DD-Mean SI	0.00159917
Logits_Threshold/Mean SD	0.00159662
STD SD-Mean HP	0.00159085
Mean AI/DD_SD_Diff	0.00158691
STD DI-STD HP	0.00158171
Mean DD:-Mean DI	0.00158067
STD HP/DD_SD_Diff	0.00157594
Mean DI/Mean HP	0.00156318
Unnamed: 0-Mean SI	0.00154123
STD SD-STD EF	0.00154113
Unnamed: 0/Logits_Threshold	0.00152888
Mean DI/Mean SI	0.00151439
Mean SD/STD EF	0.00150703
Mean SD-STD SD	0.00150654
Logits_Threshold-STD SI	0.00149785
Mean HP	0.00148591
STD DD/Mean DI	0.00148562
STD SI	0.00146854
STD FS-Mean DI	0.00144305
Unnamed: 0/STD FS	0.00143824
STD SI/HP/AI	0.00143537
Mean HP/STD HP	0.00143298
STD SD-Mean EF	0.00141451
Logits_Threshold/STD EF	0.00140718
Mean SI-Mean AI	0.00140633
Mean SD-Mean DI	0.0014008
STD FS/Mean AI	0.00139645
Unnamed: 0/Mean SI	0.00138943
Mean DI/STD DI	0.00138432
STD DI/STD HR	0.00138297
Logits_Threshold/STD HP	0.00138016
Mean DD:/STD HP	0.00137968
STD SD-Mean SI	0.00137886
STD SD-STD HP	0.00136313
Mean SI/STD SI	0.00135935
DD_SD_Diff-HP/AI	0.00135631
Unnamed: 0/Mean EF	0.00135566
STD DD-STD EF	0.00135453
STD DI/STD SI	0.00134014
Logits_Threshold-STD FS	0.00132593
STD FS-Mean HR	0.0013196
Logits_Threshold/HP/AI	0.00131691
Mean SI-STD HP	0.00130128
Logits_Threshold-STD SD	0.00129494
Unnamed: 0/HP/AI	0.00128299
Mean DD:/STD HR	0.00128175
Unnamed: 0-STD FS	0.00127135
Mean FS/STD FS	0.00126519
Mean DI/STD HP	0.00125412
STD HP-Mean AI	0.00125356
STD DD/Mean HR	0.00125316
STD SD-STD DI	0.00124535
STD SD/Mean AI	0.00123753
STD DD/STD FS	0.00123548
STD DD/STD HP	0.00122498
Mean EF/STD EF	0.00121882
Mean DD:/Mean SI	0.00121075
Mean DD:-STD EF	0.00120992
Mean SD/STD HP	0.00120278
Mean DI-STD HR	0.00119943
Mean EF-Mean AI	0.00119689
STD DI/Mean HP	0.00119432
STD SD/STD HP	0.00118262
Mean SD-Mean HR	0.00117738
Unnamed: 0-STD DI	0.00117577
STD FS/STD HP	0.00116433
Mean DD:-DD_SD_Diff	0.00115296
STD HP	0.00114833
Logits_Threshold/Mean DI	0.00114764
Mean SD/STD SD	0.00114285
Logits_Threshold/STD SI	0.00113941
STD EF-STD HR	0.00113888
Mean DI-STD SI	0.00113242
STD SD/STD SI	0.00112508
STD EF-Mean HP	0.0011245
STD EF/STD DI	0.00112257
Unnamed: 0-STD SD	0.00111927
STD DD-HP/AI	0.0011141
STD DI/HP/AI	0.00110423
STD EF-Mean HR	0.00109585
Mean EF/HP/AI	0.00109419
Mean HP/STD HR	0.00109186
Mean EF/STD HP	0.00108236
Logits_Threshold-STD HR	0.00107286
Mean DD:-STD DD	0.00106524
Mean FS/STD HR	0.00106434
Mean AI/HP/AI	0.00105717
Mean FS/Mean HR	0.00105574
Mean SI-STD HR	0.00104504
Mean HR/STD HR	0.00104282
Mean SI/HP/AI	0.00104244
STD SI-Mean HP	0.00104112
Mean DD:/STD DI	0.00103965
Unnamed: 0/STD SI	0.00103853
STD EF-STD HP	0.00102871
STD HR	0.0010226
STD SD-Mean DI	0.00102148
Mean DD:/Mean HP	0.00101987
Mean DD:/Mean DI	0.00101272
Unnamed: 0-Mean SD	0.00101138
STD SD/Mean HP	0.00100918
Mean DD:-STD SI	0.000998986
Mean HR/DD_SD_Diff	0.000996916
STD FS/Mean HR	0.0009913
Mean EF/DD_SD_Diff	0.00098828
Mean SD/Mean HR	0.000983387
STD DI/Mean AI	0.000980024
Mean DI/Mean HR	0.000976604
Logits_Threshold-Mean SD	0.000976
STD DD-Mean SD	0.000970573
Mean AI	0.000961715
Logits_Threshold/STD DI	0.000961303
Mean DD:/STD FS	0.00095344
Unnamed: 0-Mean FS	0.000950383
Logits_Threshold-DD_SD_Diff	0.000949415
STD FS/STD DI	0.000938294
Unnamed: 0/STD HR	0.000934805
STD DD-STD SD	0.000930779
STD EF/Mean AI	0.000922916
Logits_Threshold-Mean DD:	0.000922859
Unnamed: 0/Mean HR	0.000921558
STD SD/STD DI	0.000914144
STD DD-STD HR	0.000912032
STD DD/Mean HP	0.000908598
STD DD/Mean AI	0.000907765
STD SI-HP/AI	0.000903955
Mean DD:-STD SD	0.000897811
Mean FS/STD EF	0.000894644
Unnamed: 0-Mean HR	0.000892838
Mean SD-STD DI	0.000885324
STD DD-Mean FS	0.000884395
Mean SD/Mean AI	0.00088266
Logits_Threshold/STD DD	0.000881536
STD FS	0.000870528
STD DD/STD SD	0.000866657
Mean EF-Mean HR	0.000863824
STD SI-Mean AI	0.000861747
Mean FS/HP/AI	0.000861438
Mean EF/STD DI	0.000858651
STD EF-HP/AI	0.00085386
Mean HP-STD HR	0.000852147
Mean DD:-STD FS	0.000840708
STD DD/STD SI	0.000839631
STD EF/STD HP	0.000838008
STD DD	0.000835969
STD DD/STD HR	0.000832661
STD SI/STD HR	0.000820391
Mean EF/Mean HR	0.000805003
Mean SI/Mean HR	0.000804545
STD FS-STD HP	0.000803456
Mean HP-Mean AI	0.000800645
Unnamed: 0/STD DD	0.000799543
Mean SD-Mean EF	0.000774774
Logits_Threshold	0.000771245
STD FS/STD SI	0.000761718
Mean HP/Mean HR	0.000759469
Mean DD:-Mean EF	0.000756921
Unnamed: 0-Mean AI	0.000748069
Mean SD/STD HR	0.000741116
Mean SI-HP/AI	0.000737471
Unnamed: 0-Logits_Threshold	0.000737204
STD EF-Mean AI	0.000735419
Mean DI-HP/AI	0.000729172
STD DD/STD DI	0.00072501
Mean EF/Mean AI	0.000723184
Mean SD/STD SI	0.000720956
Mean DI/STD SI	0.000718578
STD DD/STD EF	0.000716956
Mean DD:/Mean HR	0.000714253
STD HR-HP/AI	0.000705499
STD FS/Mean DI	0.000699715
STD HP/HP/AI	0.00069265
Logits_Threshold-HP/AI	0.000689778
Logits_Threshold/STD SD	0.000687462
STD HR/DD_SD_Diff	0.000686494
STD EF/DD_SD_Diff	0.00068371
STD SD/Mean FS	0.000677527
Mean DI-STD DI	0.000671882
Unnamed: 0-STD SI	0.000670137
Logits_Threshold-Mean HP	0.000670046
Logits_Threshold/Mean SI	0.000662793
STD FS/HP/AI	0.000661276
STD DD/Mean FS	0.000660081
Mean FS/STD HP	0.000658053
STD EF-Mean DI	0.000657831
STD SI/Mean HR	0.000645363
STD SD/Mean HR	0.000644841
Unnamed: 0/STD DI	0.000641617
Logits_Threshold-STD DI	0.000627301
Mean EF/STD HR	0.000625985
Mean SD-STD EF	0.000608063
STD HR/HP/AI	0.000599591
Logits_Threshold-Mean AI	0.000596969
STD DI-Mean AI	0.000583229
Logits_Threshold/STD FS	0.00057696
STD SI/DD_SD_Diff	0.000569998
Unnamed: 0-STD HR	0.000569719
Unnamed: 0-STD HP	0.000568456
Logits_Threshold/STD HR	0.000564639
Mean FS/DD_SD_Diff	0.000556148
HP/AI	0.000549272
STD HP/STD HR	0.000541724
STD SD/STD HR	0.000534655
Mean SD-Mean SI	0.000524219
Mean HP-STD HP	0.000521225
Mean FS-Mean AI	0.000517569
STD FS/Mean HP	0.000508782
Unnamed: 0-Mean HP	0.000507919
Unnamed: 0-STD EF	0.000505615
Logits_Threshold/Mean DD:	0.000499379
Mean SD-STD HR	0.000494827
STD FS-Mean AI	0.00049379
Logits_Threshold/Mean AI	0.000490706
STD FS-HP/AI	0.000482075
Unnamed: 0/STD HP	0.000480589
STD DI-STD HR	0.000478883
Mean DD:-Mean SI	0.000478226
Mean HR-HP/AI	0.000467026
Logits_Threshold/Mean HR	0.000464786
STD SD/Mean EF	0.00045636
Unnamed: 0-STD DD	0.000446424
STD EF/Mean DI	0.000438182
Mean HR/HP/AI	0.000427712
Mean HR/Mean AI	0.000419652
Mean DD:/STD SD	0.000419117
Mean DD:-Mean HR	0.000411496
STD DD/Mean EF	0.00040952
STD SD/DD_SD_Diff	0.000405563
STD DI-Mean SI	0.000405513
Mean SD/STD FS	0.000398816
Mean DD:	0.00039726
STD DD-Mean HP	0.000392275
Mean HR-Mean AI	0.000390832
STD DI-Mean HR	0.000383922
Mean DI/Mean AI	0.00038251
Mean FS-HP/AI	0.000379126
Mean HP/Mean AI	0.000377805
Mean SI/Mean AI	0.000373023
Mean DD:/STD EF	0.000371563
Mean DD:-Mean AI	0.000366765
Mean DD:-Mean FS	0.000365227
STD DI/STD HP	0.000358886
STD EF-STD SI	0.000339862
Mean SD-STD HP	0.000335585
STD EF/HP/AI	0.000334302
Mean SI-STD SI	0.000331319
Mean DD:-Mean HP	0.000330434
STD SD/HP/AI	0.000321739
Unnamed: 0/Mean DI	0.000318247
STD DD-STD FS	0.000315974
STD DD/HP/AI	0.0003121
Mean SD/Mean DI	0.000301559
STD SD	0.000292779
STD HP-STD HR	0.000292718
Logits_Threshold-STD EF	0.000292536
STD DD-STD DI	0.00028823
Mean DD:/HP/AI	0.000284276
STD EF/Mean HP	0.000260963
Unnamed: 0/Mean FS	0.00024972
Unnamed: 0/Mean DD:	0.000222623
Unnamed: 0-Mean EF	0.00022244
Mean SI/STD HR	0.000210985
STD DD/Mean SI	0.000206525
STD SD-HP/AI	0.000201658
Mean SI/Mean HP	0.000196953
Mean FS-Mean HR	0.000176875
Unnamed: 0/Mean AI	0.000174197
STD FS-STD HR	0.000172403
Mean DD:-STD DI	0.000170718
STD DD/Mean SD	0.000169627
STD DI-HP/AI	0.000169497
Mean EF-HP/AI	0.000152062
STD EF	0.000151476
Mean DD:/Mean FS	0.000150664
STD DD-STD SI	0.00013278
Mean SI/STD HP	0.000113432
STD DD/DD_SD_Diff	4.68525e-05
STD DD-Mean EF	2.89342e-05
Mean SD/HP/AI	0
Mean DD:-HP/AI	0
Mean DD:/STD DD	0
Mean SD/Mean HP	0
STD SD-STD HR	0
STD SD-Mean AI	0
Mean SD-Mean HP	0
Mean DI-STD HP	0
STD FS/STD HR	0
STD EF/Mean SI	0
Mean AI-HP/AI	0
STD DD-Mean AI	0
Mean EF-STD HR	0
Mean HP-HP/AI	0

## Sheet: Unsupervised_Logits
Name	TrueTarget	PredClusterRaw	Hungarian_PredClusterMapped	Dist_C0	Dist_C1	Logit_C0	Logit_C1	Prob_C0	Prob_C1	PredMappedProb	PC1	PC2
1 week female	0	1	0	2.43924	0.813011	-2.97495	-0.330494	0.0663316	0.933668	0.0663316	0.873296	-0.5212
5 week female	1	0	1	0.92241	2.13286	-0.42542	-2.27455	0.864025	0.135975	0.135975	-0.644828	-0.257998
1 week female	0	0	1	1.21829	1.85661	-0.74211	-1.72351	0.727385	0.272615	0.272615	-0.349251	-0.34674
1 week female	0	1	0	2.37277	0.961377	-2.81503	-0.462122	0.0868351	0.913165	0.0868351	0.77986	-0.637285
5 week male	1	0	1	0.932744	3.40434	-0.435006	-5.79477	0.99532	0.00467999	0.00467999	-1.88552	0.791837
5 week male	1	1	0	3.42943	0.504379	-5.88049	-0.127199	0.00316228	0.996838	0.00316228	1.90209	-0.121291
1 week male	0	1	0	3.06052	0.262668	-4.68338	-0.0344971	0.00948154	0.990518	0.00948154	1.53518	-0.179881
5 week female	1	0	1	0.662501	3.56931	-0.219453	-6.36998	0.997872	0.00212782	0.00212782	-2.09595	-0.345297
5 week male	1	0	1	5.2572	7.84682	-13.8191	-30.7863	1	4.27793e-08	4.27793e-08	-5.93446	1.55325
5 week male	1	0	1	1.82649	3.23836	-1.66803	-5.24348	0.97276	0.0272399	0.0272399	-1.32664	1.74761
5 week female	1	0	1	0.86085	2.90779	-0.370532	-4.22762	0.979308	0.0206923	0.0206923	-1.29742	-0.871131
5 week female	1	0	1	0.908646	2.6968	-0.412819	-3.63638	0.961711	0.0382888	0.0382888	-1.0853	-0.840476
1 week male	0	1	0	2.78517	0.339005	-3.87858	-0.0574624	0.0214339	0.978566	0.0214339	1.26047	-0.187177
5 week male	1	0	1	1.65164	2.11249	-1.36395	-2.23131	0.704196	0.295804	0.295804	-0.371849	1.10268
5 week female	1	0	1	1.94555	2.09561	-1.89258	-2.19579	0.575228	0.424772	0.424772	-0.0889084	-1.3704
1 week female	0	1	0	2.26741	1.32713	-2.57058	-0.88063	0.155782	0.844218	0.155782	0.566926	-0.939108
1 week male	0	0	1	3.47789	6.38709	-6.04784	-20.3974	0.999999	5.86199e-07	5.86199e-07	-4.917	-0.0296134
1 week male	0	1	0	3.44272	0.484997	-5.92616	-0.117611	0.00299279	0.997007	0.00299279	1.91866	0.00723701
1 week female	0	1	0	2.09726	0.899454	-2.19924	-0.404509	0.142493	0.857507	0.142493	0.572243	-0.0223095
1 week female	0	1	0	1.87608	1.30011	-1.75985	-0.845142	0.286038	0.713962	0.286038	0.292432	-0.542459
1 week female	0	1	0	2.3791	1.20379	-2.83006	-0.724552	0.108563	0.891437	0.108563	0.705457	-0.893286
1 week male	0	1	0	3.09421	1.38754	-4.78708	-0.962629	0.0213641	0.978636	0.0213641	1.20095	1.39221
1 week male	0	1	0	2.10272	1.37765	-2.21073	-0.948966	0.220671	0.779329	0.220671	0.356613	0.864646
5 week male	1	0	1	0.705859	2.34168	-0.249118	-2.74174	0.923623	0.076377	0.076377	-0.871563	-0.00169276
1 week female	0	0	1	1.05172	2.09469	-0.553052	-2.19386	0.837644	0.162356	0.162356	-0.567161	-0.479294
5 week male	1	0	1	1.313	2.09434	-0.861984	-2.19312	0.791029	0.208971	0.208971	-0.514215	0.755064
5 week female	1	1	0	1.63528	1.51519	-1.33707	-1.1479	0.452848	0.547152	0.452848	0.0131774	0.457723
1 week female	0	1	0	4.57087	1.61958	-10.4464	-1.31152	0.000107824	0.999892	0.000107824	3.02938	0.0278458
5 week male	1	0	1	1.63235	1.75324	-1.33228	-1.53693	0.550986	0.449014	0.449014	-0.133626	0.769862
5 week female	1	0	1	0.59067	3.17211	-0.174445	-5.03113	0.992284	0.00771625	0.00771625	-1.646	-0.598517
1 week male	0	1	0	4.06398	1.62743	-8.25798	-1.32426	0.000973423	0.999027	0.000973423	2.24227	1.46568
1 week female	0	0	1	1.25835	1.8296	-0.791717	-1.67372	0.707236	0.292764	0.292764	-0.31444	-0.37143
5 week female	1	0	1	0.611088	3.19218	-0.186715	-5.095	0.992669	0.00733097	0.00733097	-1.66286	-0.618339
1 week male	0	1	0	2.91991	0.506778	-4.26293	-0.128412	0.0157581	0.984242	0.0157581	1.37372	-0.435299
1 week male	0	1	0	5.72313	2.78985	-16.3771	-3.89162	3.7812e-06	0.999996	3.7812e-06	4.12939	0.559792
1 week male	0	1	0	2.44022	1.34198	-2.97734	-0.900462	0.111365	0.888635	0.111365	0.624922	1.07502
5 week female	1	0	1	1.2386	2.86138	-0.767071	-4.09376	0.965333	0.0346668	0.0346668	-1.10609	-1.22139
5 week male	1	1	0	3.24429	0.836885	-5.26272	-0.350188	0.00730015	0.9927	0.00730015	1.58873	0.850326
5 week male	1	0	1	0.456105	2.63176	-0.104016	-3.46308	0.9664	0.0335996	0.0335996	-1.15575	-0.248861
5 week male	1	0	1	2.79591	5.74042	-3.90856	-16.4762	0.999997	3.48279e-06	3.48279e-06	-4.2722	-0.503897
1 week male	0	1	0	4.25651	1.65509	-9.05894	-1.36965	0.000457498	0.999543	0.000457498	2.50293	1.31954
1 week male	0	1	0	5.11978	2.32834	-13.1061	-2.71059	3.05698e-05	0.999969	3.05698e-05	3.46782	-0.743965
5 week male	1	0	1	1.08253	3.43519	-0.585934	-5.90028	0.995104	0.0048964	0.0048964	-1.87872	0.952192
5 week male	1	0	1	1.05725	2.37645	-0.558889	-2.82375	0.905925	0.0940749	0.0940749	-0.828693	0.714035
5 week male	1	1	0	2.40201	1.63292	-2.88482	-1.33322	0.174854	0.825146	0.174854	0.437368	1.30803
1 week male	0	0	1	0.383775	2.97666	-0.0736414	-4.43026	0.987341	0.0126593	0.0126593	-1.51827	0.287517
5 week female	1	0	1	0.945299	3.45946	-0.446795	-5.98394	0.996078	0.00392231	0.00392231	-1.86164	-0.910599
1 week female	0	1	0	2.75816	1.15275	-3.80371	-0.664411	0.0415149	0.958485	0.0415149	1.05344	-1.01234
5 week female	1	0	1	0.919101	3.34537	-0.422373	-5.59574	0.994366	0.00563353	0.00563353	-1.82246	0.802114
1 week male	0	1	0	6.4118	3.89017	-20.5556	-7.5667	2.28551e-06	0.999998	2.28551e-06	4.22038	2.76233
5 week female	1	0	1	0.636664	2.7317	-0.202671	-3.7311	0.971486	0.0285141	0.0285141	-1.19876	-0.572847
5 week female	1	0	1	0.557025	2.71752	-0.155138	-3.69246	0.971731	0.0282686	0.0282686	-1.20588	-0.470003
1 week male	0	1	0	3.108	0.307121	-4.82982	-0.0471616	0.00830416	0.991696	0.00830416	1.58104	-0.208508
5 week female	1	0	1	0.784472	2.26977	-0.307698	-2.57594	0.906212	0.0937879	0.0937879	-0.787133	-0.24197
1 week male	0	1	0	3.32956	1.13969	-5.54299	-0.649448	0.00743909	0.992561	0.00743909	1.57057	1.15993
5 week male	1	0	1	2.09587	5.00835	-2.19634	-12.5418	0.999968	3.21383e-05	3.21383e-05	-3.4988	-0.733499
5 week male	1	1	0	2.55719	1.21249	-3.2696	-0.735061	0.0734719	0.926528	0.0734719	0.779669	1.03564
5 week female	1	0	1	0.667887	3.47495	-0.223036	-6.03766	0.997025	0.00297474	0.00297474	-1.97405	-0.510165
1 week female	0	1	0	3.45055	1.05761	-5.95314	-0.559273	0.00452379	0.995476	0.00452379	1.80289	-0.876303
5 week female	1	0	1	1.1999	1.8873	-0.719885	-1.78094	0.742893	0.257107	0.257107	-0.375362	-0.385644
5 week female	1	0	1	0.866743	2.65389	-0.375621	-3.52156	0.958748	0.0412515	0.0412515	-1.06175	-0.775878
1 week male	0	1	0	2.48017	0.509408	-3.07562	-0.129748	0.0499318	0.950068	0.0499318	0.956146	0.0346858
1 week female	0	1	0	3.57538	0.755505	-6.39168	-0.285394	0.00222385	0.997776	0.00222385	2.02723	-0.370194
5 week female	1	0	1	1.26164	2.2067	-0.795871	-2.43476	0.837384	0.162616	0.162616	-0.551542	-0.863339
5 week male	1	0	1	2.67574	5.55873	-3.57978	-15.4498	0.999993	6.99732e-06	6.99732e-06	-3.99687	-1.00355
5 week male	1	1	0	1.96532	1.32509	-1.93124	-0.877936	0.25859	0.74141	0.25859	0.297579	0.64458
5 week female	1	0	1	1.43344	1.7793	-1.02738	-1.58295	0.635428	0.364572	0.364572	-0.196782	-0.59995
1 week female	0	0	1	1.2458	2.04736	-0.776011	-2.09585	0.789155	0.210845	0.210845	-0.449768	-0.678902
1 week male	0	0	1	0.252979	3.09317	-0.0319991	-4.78385	0.991438	0.00856179	0.00856179	-1.64202	0.0765874
1 week female	0	1	0	3.99805	1.10868	-7.99221	-0.614586	0.000624694	0.999375	0.000624694	2.45167	-0.308112
5 week male	1	1	0	1.88328	1.48349	-1.77338	-1.10037	0.337824	0.662176	0.337824	0.166317	0.732628
5 week male	1	0	1	1.16575	2.34428	-0.679485	-2.74782	0.887787	0.112213	0.112213	-0.765742	0.802648
1 week male	0	0	1	0.913691	3.00569	-0.417415	-4.5171	0.983692	0.0163076	0.0163076	-1.45878	0.843399
1 week male	0	1	0	4.78343	1.92656	-11.4406	-1.85582	6.8761e-05	0.999931	6.8761e-05	3.19016	-0.465225
5 week male	1	0	1	0.696595	3.43035	-0.242622	-5.88365	0.996463	0.00353667	0.00353667	-1.91091	-0.5955
1 week female	0	1	0	3.79728	1.30933	-7.20968	-0.857175	0.00173935	0.998261	0.00173935	2.12571	-0.961039
5 week male	1	0	1	7.02693	9.75786	-24.6889	-47.6079	1	1.11275e-10	1.11275e-10	-7.9128	0.28279
5 week female	1	0	1	1.57058	1.72458	-1.23336	-1.48708	0.563092	0.436908	0.436908	-0.0911343	-0.706875
5 week male	1	0	1	1.89118	3.86577	-1.78829	-7.47208	0.996611	0.00338913	0.00338913	-2.0468	1.7231
5 week female	1	1	0	1.66671	1.50484	-1.38897	-1.13227	0.436175	0.563825	0.436175	0.074144	-0.536161
5 week male	1	0	1	0.7155	2.70577	-0.25597	-3.66059	0.967849	0.0321515	0.0321515	-1.20885	0.564372
5 week female	1	0	1	0.727569	2.28746	-0.264679	-2.61623	0.913058	0.0869421	0.0869421	-0.826571	0.0113235
5 week male	1	0	1	3.22679	4.67274	-5.2061	-10.9173	0.996702	0.00329787	0.00329787	-2.12878	3.01157
1 week female	0	1	0	3.2466	0.292892	-5.2702	-0.0428929	0.00533932	0.994661	0.00533932	1.72279	-0.00208087
5 week female	1	0	1	1.46556	2.0216	-1.07393	-2.04344	0.725021	0.274979	0.274979	-0.325374	-0.908968
5 week male	1	0	1	6.35801	9.0859	-20.2121	-41.2768	1	7.1076e-10	7.1076e-10	-7.28665	0.567242
1 week female	0	1	0	2.50612	0.649371	-3.14033	-0.210841	0.0507149	0.949285	0.0507149	0.938575	0.394965
5 week male	1	0	1	0.555987	2.50927	-0.154561	-3.14822	0.952287	0.0477134	0.0477134	-1.04676	0.106763
5 week male	1	0	1	1.0655	3.89081	-0.567647	-7.56921	0.99909	0.000909632	0.000909632	-2.36784	-0.673692
1 week female	0	1	0	3.2161	0.588637	-5.17164	-0.173247	0.00670354	0.993296	0.00670354	1.66075	-0.472408
1 week female	0	1	0	3.03467	0.506658	-4.6046	-0.128351	0.0112481	0.988752	0.0112481	1.45314	0.531045
1 week female	0	1	0	1.97519	1.29166	-1.95069	-0.834198	0.246662	0.753338	0.246662	0.367534	-0.638223
1 week female	0	1	0	4.95107	2.0006	-12.2565	-2.00119	3.51681e-05	0.999965	3.51681e-05	3.39823	0.17825
1 week male	0	1	0	2.72737	1.65697	-3.71926	-1.37278	0.0873454	0.912655	0.0873454	0.799255	-1.4401
5 week female	1	0	1	0.810378	3.49984	-0.328356	-6.12443	0.99697	0.00303026	0.00303026	-1.95845	-0.706607
1 week male	0	1	0	2.60093	0.637975	-3.38242	-0.203506	0.0399669	0.960033	0.0399669	1.0538	-0.423759
5 week female	1	0	1	1.37051	1.87732	-0.939145	-1.76216	0.694877	0.305123	0.305123	-0.334081	0.583453
1 week male	0	1	0	3.19117	2.06155	-5.09179	-2.125	0.0489488	0.951051	0.0489488	0.886438	2.01411
1 week male	0	1	0	3.46112	0.620552	-5.98967	-0.192543	0.00302706	0.996973	0.00302706	1.92447	-0.312157
1 week female	0	1	0	3.47881	0.903931	-6.05106	-0.408546	0.00353142	0.996469	0.00353142	1.83534	0.84146
1 week female	0	1	0	3.60013	1.20869	-6.48047	-0.73046	0.00317266	0.996827	0.00317266	1.92535	-0.977245
5 week male	1	0	1	2.20198	5.1413	-2.42436	-13.2165	0.999979	2.05605e-05	2.05605e-05	-3.7	0.0396774
1 week female	0	1	0	2.35604	0.783289	-2.77546	-0.306771	0.0780824	0.921918	0.0780824	0.811003	-0.395592
1 week male	0	1	0	1.65434	1.34851	-1.36842	-0.909238	0.387181	0.612819	0.387181	0.125332	-0.0821939
5 week male	1	0	1	1.22691	4.15239	-0.752649	-8.62117	0.999618	0.000382453	0.000382453	-2.71109	0.211634
5 week male	1	0	1	1.04053	3.99403	-0.541349	-7.97614	0.99941	0.000590002	0.000590002	-2.53596	-0.270819
1 week male	0	1	0	3.68981	0.830219	-6.80735	-0.344632	0.00155812	0.998442	0.00155812	2.1453	-0.323466
1 week female	0	0	1	1.45129	1.54627	-1.05312	-1.19547	0.535528	0.464472	0.464472	-0.078751	-0.0612446
1 week female	0	1	0	2.14101	0.854622	-2.29195	-0.36519	0.127109	0.872891	0.127109	0.609655	0.120726
1 week female	0	1	0	2.20039	1.14459	-2.42085	-0.65504	0.146064	0.853936	0.146064	0.586088	-0.696434
5 week female	1	1	0	1.59318	1.41376	-1.2691	-0.999361	0.43297	0.56703	0.43297	0.0626283	-0.10282
1 week male	0	1	0	3.83476	1.83091	-7.35268	-1.67612	0.00341364	0.996586	0.00341364	1.80635	1.83232
5 week female	1	0	1	0.214499	2.96517	-0.0230049	-4.39612	0.987545	0.0124548	0.0124548	-1.50409	-0.118043
5 week female	1	0	1	0.40792	2.64441	-0.0831992	-3.49646	0.968117	0.0318835	0.0318835	-1.18793	0.065175
1 week male	0	1	0	3.15142	0.285496	-4.96574	-0.0407539	0.00721048	0.99279	0.00721048	1.62748	-0.146806
1 week male	0	1	0	3.07647	0.979315	-4.73235	-0.479529	0.0140246	0.985975	0.0140246	1.36166	0.994926
5 week male	1	0	1	1.46885	1.60329	-1.07877	-1.28527	0.551443	0.448557	0.448557	-0.110657	0.258187
5 week female	1	0	1	0.37132	3.17274	-0.0689394	-5.03313	0.993065	0.00693519	0.00693519	-1.72188	0.219338
1 week female	0	0	1	1.09305	1.99986	-0.597379	-1.99972	0.802555	0.197445	0.197445	-0.490388	-0.395471
1 week male	0	1	0	3.09328	0.382585	-4.78419	-0.0731855	0.00891556	0.991084	0.00891556	1.53737	0.39226
5 week male	1	1	0	1.58519	1.44383	-1.25641	-1.04233	0.446682	0.553318	0.446682	0.0471799	-0.138602
5 week male	1	0	1	0.516173	2.50707	-0.133217	-3.14271	0.953001	0.046999	0.046999	-1.04459	-0.092728
1 week male	0	0	1	1.34612	4.21127	-0.906014	-8.86738	0.999651	0.000348556	0.000348556	-2.75527	0.44842
1 week female	0	1	0	3.24508	0.404579	-5.26527	-0.081842	0.00557745	0.994423	0.00557745	1.71561	-0.229374
1 week male	0	1	0	4.20368	1.2527	-8.83548	-0.784629	0.00031873	0.999681	0.00031873	2.66873	-0.0273066
5 week male	1	0	1	0.849295	3.7652	-0.360651	-7.08835	0.998804	0.00119585	0.00119585	-2.28958	-0.388465
1 week female	0	1	0	1.52693	1.49455	-1.16575	-1.11684	0.487773	0.512227	0.487773	-0.00828643	-0.211222
1 week male	0	1	0	3.39501	0.691734	-5.76304	-0.239248	0.00397482	0.996025	0.00397482	1.80251	0.623077
5 week male	1	0	1	1.16374	2.55856	-0.677147	-3.27312	0.930602	0.0693978	0.0693978	-0.951904	0.940255
5 week female	1	0	1	0.996164	2.57443	-0.496171	-3.31384	0.943623	0.056377	0.056377	-0.94762	-0.860293
1 week male	0	1	0	1.61224	1.51029	-1.29966	-1.14049	0.460292	0.539708	0.460292	0.00547131	0.404347
5 week male	1	0	1	0.585352	3.09762	-0.171319	-4.79762	0.990304	0.00969602	0.00969602	-1.56791	-0.605745
5 week female	1	0	1	1.85771	1.99445	-1.72554	-1.98892	0.565469	0.434531	0.434531	-0.0791143	-1.23083
1 week male	0	1	0	2.13378	1.78943	-2.27651	-1.60103	0.337269	0.662731	0.337269	0.147636	1.23071
1 week male	0	1	0	2.76935	0.28459	-3.83464	-0.0404957	0.0220069	0.977993	0.0220069	1.24734	-0.0912395
5 week female	1	1	0	2.15402	1.97085	-2.31991	-1.94212	0.40666	0.59334	0.40666	0.14372	-1.42396
1 week female	0	1	0	3.03489	1.34693	-4.60528	-0.907105	0.0241701	0.97583	0.0241701	1.24567	-1.23324
5 week female	1	0	1	0.228149	2.91322	-0.026026	-4.24343	0.985477	0.0145228	0.0145228	-1.45968	0.0535543
5 week female	1	1	0	4.11381	1.64775	-8.46172	-1.35753	0.00082098	0.999179	0.00082098	2.30179	1.45034
1 week male	0	0	1	1.32181	2.07912	-0.873591	-2.16137	0.78377	0.21623	0.21623	-0.499109	0.749272
1 week male	0	1	0	3.02339	1.39055	-4.57046	-0.966819	0.026503	0.973497	0.026503	1.12944	1.36764
5 week male	1	0	1	1.82313	2.96743	-1.66191	-4.40281	0.939398	0.0606024	0.0606024	-1.03885	1.69233
1 week male	0	1	0	1.82393	1.69029	-1.66336	-1.42854	0.441565	0.558435	0.441565	0.0796882	-0.938214
5 week female	1	0	1	1.50376	1.77801	-1.13065	-1.58066	0.610641	0.389359	0.389359	-0.157803	-0.690415
5 week female	1	1	0	2.00096	1.55817	-2.00192	-1.21395	0.312606	0.687394	0.312606	0.265562	-0.962643
5 week female	1	1	0	1.911	1.3528	-1.82597	-0.915033	0.286809	0.713191	0.286809	0.298339	-0.644504
1 week male	0	1	0	3.49577	0.824817	-6.11021	-0.340162	0.00310991	0.99689	0.00310991	1.91994	-0.562944
5 week female	1	1	0	2.07111	1.13278	-2.14476	-0.641595	0.181955	0.818045	0.181955	0.494193	-0.533399
5 week female	1	0	1	0.598227	2.44017	-0.178938	-2.97723	0.942583	0.0574168	0.0574168	-0.969464	-0.173043
5 week female	1	0	1	0.931025	3.03953	-0.433404	-4.61936	0.98502	0.0149799	0.0149799	-1.40431	-0.963988
1 week male	0	0	1	1.35544	2.26823	-0.918605	-2.57244	0.839408	0.160592	0.160592	-0.551091	-1.00586
5 week male	1	0	1	0.220482	2.98546	-0.0243061	-4.45649	0.988251	0.0117489	0.0117489	-1.53314	0.0662002
1 week female	0	1	0	3.53784	0.946498	-6.25815	-0.447929	0.00298782	0.997012	0.00298782	1.88854	0.875376
1 week female	0	1	0	5.02214	2.07452	-12.611	-2.15182	2.86838e-05	0.999971	2.86838e-05	3.46154	0.302242
5 week male	1	0	1	3.13838	5.37489	-4.92473	-14.4447	0.999927	7.33647e-05	7.33647e-05	-3.39455	2.21297
5 week female	1	0	1	0.951588	3.82893	-0.45276	-7.33034	0.99897	0.00102957	0.00102957	-2.33346	-0.523815
5 week male	1	0	1	1.31353	1.93021	-0.862685	-1.86285	0.731091	0.268909	0.268909	-0.345204	-0.636892
1 week female	0	0	1	1.47304	1.63872	-1.08493	-1.3427	0.564089	0.435911	0.435911	-0.102585	-0.438243
1 week female	0	1	0	2.82541	0.205807	-3.99147	-0.0211783	0.0185185	0.981481	0.0185185	1.30366	-0.0532092
1 week male	0	1	0	4.56144	2.11586	-10.4034	-2.23843	0.000284377	0.999716	0.000284377	2.64569	1.78575
1 week female	0	1	0	3.5347	0.601718	-6.24706	-0.181032	0.00231499	0.997685	0.00231499	1.99509	0.283746
5 week female	1	0	1	1.07303	2.24629	-0.575696	-2.52291	0.875142	0.124858	0.124858	-0.661677	-0.688064
5 week female	1	0	1	0.854729	2.79395	-0.365281	-3.90307	0.971744	0.028256	0.028256	-1.19098	-0.82435
1 week male	0	1	0	2.08714	1.25526	-2.17809	-0.787838	0.199368	0.800632	0.199368	0.460887	-0.717761
1 week female	0	1	0	3.98932	1.6023	-7.95732	-1.28368	0.0012622	0.998738	0.0012622	2.23815	-1.19365
5 week female	1	0	1	0.938853	2.06764	-0.440723	-2.13756	0.845121	0.154879	0.154879	-0.601782	-0.0837437
1 week female	0	1	0	5.60003	2.97029	-15.6802	-4.41131	1.27642e-05	0.999987	1.27642e-05	3.77068	-1.3133
1 week female	0	1	0	4.70925	2.05259	-11.0885	-2.10657	0.000125644	0.999874	0.000125644	2.93017	1.46679
1 week female	0	1	0	10.1652	7.38787	-51.6652	-27.2903	2.59504e-11	1	2.59504e-11	8.10852	-0.87991
1 week male	0	1	0	1.84555	1.27879	-1.70302	-0.81765	0.292066	0.707934	0.292066	0.249518	0.416364
1 week male	0	1	0	2.50033	2.36865	-3.12582	-2.80526	0.420539	0.579461	0.420539	-0.0088201	1.92097
1 week male	0	1	0	2.72371	0.448543	-3.70929	-0.100595	0.0263728	0.973627	0.0263728	1.16711	0.364365
5 week male	1	0	1	0.412168	3.23658	-0.0849412	-5.23774	0.99425	0.00574996	0.00574996	-1.75816	-0.339754
1 week female	0	1	0	3.75205	1.40854	-7.03895	-0.991987	0.00235946	0.997641	0.00235946	2.02747	-1.12069
5 week male	1	0	1	1.34261	2.06076	-0.901295	-2.12337	0.772428	0.227572	0.227572	-0.410287	-0.786018
1 week female	0	1	0	1.70091	1.3736	-1.44655	-0.943394	0.376799	0.623201	0.376799	0.150996	-0.313352
5 week male	1	1	0	2.51554	1.59523	-3.16397	-1.27238	0.131063	0.868937	0.131063	0.644832	-1.31224

## Sheet: Supervised_Logits
Name	Fold	True_Label	Predicted_Label	Ensemble_Prob	Ensemble_Logit	LR_Prob	LR_Decision	LR_Logit	SVM_Prob	SVM_Decision	SVM_Logit	XGB_Prob	XGB_Margin	XGB_Logit
1wM	1	0	0	0.0816	-2.4208	0.143894	-1.78331	-1.78331	0.0793241	-1.38156	-2.45157	0.0215816	-3.8141	-3.8141
5wM	1	1	1	0.808944	1.44316	0.711841	0.904341	0.904341	0.841577	1.1317	1.67001	0.873414	1.93148	1.93148
5wM	1	1	1	0.606477	0.432526	0.565645	0.264104	0.264104	0.667197	0.537833	0.695534	0.586588	0.34988	0.34988
1wF	1	0	0	0.421251	-0.317639	0.354769	-0.598143	-0.598143	0.273992	-0.480682	-0.974461	0.634993	0.553697	0.553697
1wF	1	0	0	0.26145	-1.03845	0.354728	-0.598322	-0.598322	0.233702	-0.610628	-1.18752	0.195919	-1.412	-1.412
1wF	1	0	0	0.329858	-0.708825	0.319381	-0.756617	-0.756617	0.223404	-0.646256	-1.24594	0.44679	-0.213647	-0.213647
5wF	1	1	1	0.907358	2.2818	0.883953	2.03041	2.03041	0.859707	1.21862	1.81286	0.978414	3.81388	3.81388
5wM	1	1	1	0.81138	1.459	0.692369	0.811216	0.811216	0.804713	0.977091	1.41601	0.937059	2.70055	2.70055
1wF	1	0	0	0.141441	-1.80337	0.223664	-1.24444	-1.24444	0.149636	-0.946029	-1.73746	0.0510226	-2.92312	-2.92312
5wF	1	1	1	0.871252	1.91207	0.846884	1.71037	1.71037	0.86872	1.26536	1.88969	0.898151	2.17685	2.17684
5wF	1	1	1	0.881528	2.00698	0.819816	1.5151	1.5151	0.844901	1.147	1.69515	0.979868	3.88511	3.88511
1wF	1	0	0	0.0668816	-2.63561	0.0976409	-2.22372	-2.22372	0.0807366	-1.36985	-2.43238	0.0222674	-3.78211	-3.78211
1wF	1	0	0	0.0808129	-2.43135	0.0787859	-2.45896	-2.45896	0.070671	-1.45771	-2.57643	0.0929817	-2.27776	-2.27776
5wF	1	1	1	0.571622	0.288473	0.589154	0.360468	0.360468	0.608507	0.379591	0.441042	0.517206	0.0688516	0.0688515
1wM	1	0	1	0.80939	1.44605	0.796837	1.36664	1.36664	0.86606	1.25129	1.86656	0.765272	1.1818	1.1818
5wM	1	1	1	0.898377	2.17932	0.908863	2.29983	2.29983	0.857084	1.20549	1.79128	0.929185	2.57424	2.57424
1wF	1	0	0	0.0741546	-2.52456	0.116329	-2.02766	-2.02766	0.0744391	-1.42355	-2.52042	0.0316952	-3.41938	-3.41938
5wM	1	1	1	0.902522	2.22556	0.942589	2.7984	2.7984	0.844733	1.14622	1.69387	0.920243	2.44565	2.44565
5wF	1	1	1	0.900046	2.19773	0.915234	2.37929	2.37929	0.855719	1.19873	1.78018	0.929185	2.57424	2.57424
1wM	1	0	0	0.138302	-1.82947	0.247646	-1.11121	-1.11121	0.125876	-1.06829	-1.93792	0.0413834	-3.14261	-3.14261
1wM	1	0	0	0.0858598	-2.36527	0.0934694	-2.27199	-2.27199	0.0711282	-1.45348	-2.56949	0.0929817	-2.27776	-2.27776
1wF	1	0	0	0.110294	-2.08775	0.104818	-2.1448	-2.1448	0.0885008	-1.30868	-2.33208	0.137561	-1.83569	-1.83569
1wF	1	0	0	0.167219	-1.60547	0.292165	-0.88489	-0.88489	0.168109	-0.861641	-1.59909	0.0413834	-3.14261	-3.14261
1wM	1	0	0	0.0653272	-2.66079	0.0688615	-2.60431	-2.60431	0.0714593	-1.45042	-2.56449	0.0556607	-2.83121	-2.83121
1wF	1	0	0	0.070813	-2.57427	0.117333	-2.01794	-2.01794	0.073525	-1.43169	-2.53376	0.0215816	-3.8141	-3.8141
5wF	1	1	1	0.825085	1.55119	0.837154	1.63721	1.63721	0.861878	1.22964	1.83097	0.776224	1.24379	1.24379
5wF	1	1	0	0.0634119	-2.69259	0.0572688	-2.80103	-2.80103	0.100221	-1.22494	-2.19477	0.0327462	-3.38568	-3.38568
5wF	1	1	0	0.487307	-0.0507848	0.446171	-0.216154	-0.216154	0.407339	-0.116206	-0.374975	0.608409	0.44063	0.44063
5wM	1	1	1	0.778537	1.25716	0.846353	1.70628	1.70628	0.863588	1.23843	1.84542	0.62567	0.513687	0.513686
5wF	1	1	1	0.904394	2.24702	0.937434	2.70692	2.70692	0.846562	1.15474	1.70788	0.929185	2.57424	2.57424
5wM	1	1	1	0.577199	0.311287	0.630193	0.533043	0.533043	0.670197	0.546093	0.709076	0.431209	-0.276922	-0.276922
1wF	1	0	0	0.0996781	-2.20081	0.183884	-1.49025	-1.49025	0.0935688	-1.27132	-2.27082	0.0215816	-3.8141	-3.8141
5wF	1	1	1	0.74894	1.09296	0.713877	0.91429	0.91429	0.768391	0.84501	1.19925	0.76455	1.17779	1.17779
1wM	1	0	0	0.399302	-0.408376	0.394017	-0.430457	-0.430457	0.298838	-0.406506	-0.852839	0.50505	0.0202008	0.0202009
1wF	1	0	0	0.0619052	-2.71825	0.0719733	-2.55677	-2.55677	0.0866985	-1.32244	-2.35463	0.0270439	-3.58288	-3.58288
5wM	1	1	1	0.686677	0.784631	0.669105	0.704141	0.704141	0.701827	0.635706	0.856011	0.6891	0.795915	0.795915
5wF	2	1	1	0.74583	1.07649	0.698071	0.838129	0.838129	0.81854	0.92279	1.50649	0.720879	0.948827	0.948827
1wF	2	0	0	0.141001	-1.807	0.249249	-1.10262	-1.10262	0.12218	-1.00539	-1.97195	0.0515748	-2.91177	-2.91177
5wF	2	1	1	0.899344	2.18996	0.829533	1.58232	1.58232	0.894828	1.27387	2.14104	0.973672	3.61044	3.61044
1wM	2	0	0	0.0893549	-2.32154	0.0800054	-2.44227	-2.44227	0.049251	-1.57518	-2.96032	0.138808	-1.82522	-1.82522
1wF	2	0	0	0.423581	-0.308088	0.38395	-0.472818	-0.472818	0.322636	-0.323345	-0.741683	0.564158	0.258056	0.258056
1wM	2	0	0	0.183536	-1.49257	0.215491	-1.29214	-1.29214	0.166292	-0.805918	-1.61214	0.168824	-1.59398	-1.59398
1wM	2	0	0	0.398581	-0.41138	0.351722	-0.611478	-0.611478	0.295659	-0.393405	-0.868056	0.548363	0.194058	0.194058
5wM	2	1	0	0.0959927	-2.24257	0.139968	-1.81555	-1.81555	0.0959445	-1.15573	-2.24312	0.0520651	-2.90179	-2.90179
1wM	2	0	0	0.079434	-2.45006	0.0486937	-2.97229	-2.97229	0.104143	-1.10522	-2.15202	0.0854653	-2.3703	-2.3703
5wM	2	1	1	0.509087	0.0363529	0.400062	-0.405207	-0.405207	0.379282	-0.188003	-0.492597	0.747918	1.08754	1.08754
1wM	2	0	1	0.898834	2.18434	0.849446	1.73026	1.73026	0.885865	1.22301	2.04918	0.961192	3.20955	3.20955
5wF	2	1	1	0.925286	2.51644	0.906702	2.27401	2.27401	0.900434	1.30767	2.20206	0.968722	3.43305	3.43305
1wM	2	0	0	0.0582252	-2.78345	0.112839	-2.06207	-2.06207	0.0487067	-1.58147	-2.97201	0.0131303	-4.31962	-4.31962
5wF	2	1	1	0.839804	1.65677	0.730882	0.999103	0.999103	0.846878	1.03555	1.71032	0.941651	2.7812	2.7812
5wM	2	1	0	0.401805	-0.39795	0.441907	-0.233427	-0.233427	0.422667	-0.0855692	-0.311833	0.340841	-0.65955	-0.65955
5wM	2	1	1	0.826534	1.56126	0.713361	0.911762	0.911762	0.82672	0.953814	1.56256	0.939523	2.74311	2.74311
1wF	2	0	0	0.0466926	-3.01635	0.0392338	-3.19819	-3.19819	0.0379751	-1.72175	-3.23211	0.0628688	-2.70177	-2.70177
5wF	2	1	1	0.691499	0.807138	0.580778	0.325967	0.325967	0.687384	0.524648	0.787919	0.806336	1.42638	1.42637
1wF	2	0	0	0.096697	-2.23448	0.152903	-1.71201	-1.71201	0.0851226	-1.22867	-2.3747	0.0520651	-2.90179	-2.90179
1wF	2	0	0	0.053269	-2.87766	0.010108	-4.58427	-4.58427	0.0939805	-1.16839	-2.26597	0.0557184	-2.83011	-2.83011
1wM	2	0	0	0.398619	-0.411221	0.291353	-0.888821	-0.888821	0.244548	-0.537462	-1.1279	0.659957	0.663102	0.663102
5wF	2	1	1	0.894883	2.14162	0.857162	1.79192	1.79192	0.895158	1.27581	2.14454	0.93233	2.62305	2.62305
5wF	2	1	1	0.883805	2.02897	0.806007	1.42427	1.42427	0.884215	1.21404	2.03297	0.961192	3.20955	3.20955
5wM	2	1	1	0.924432	2.50414	0.933704	2.64504	2.64504	0.88129	1.19839	2.0047	0.958301	3.1347	3.13469
1wF	2	0	1	0.634415	0.551205	0.509084	0.0363401	0.0363401	0.541292	0.179556	0.165546	0.852869	1.75728	1.75728
5wF	2	1	1	0.86806	1.88392	0.760718	1.15662	1.15662	0.866027	1.12181	1.86628	0.977436	3.76859	3.76859
5wF	2	1	0	0.480585	-0.0776976	0.392051	-0.438699	-0.438699	0.401774	-0.134148	-0.398079	0.647931	0.609958	0.609958
1wM	2	0	0	0.195837	-1.41252	0.24009	-1.15219	-1.15219	0.178598	-0.758095	-1.52588	0.168824	-1.59398	-1.59398
5wM	2	1	1	0.776658	1.24629	0.726772	0.978307	0.978307	0.817121	0.917519	1.49696	0.78608	1.30145	1.30145
5wF	2	1	0	0.296479	-0.864123	0.40154	-0.399051	-0.399051	0.329203	-0.315839	-0.711792	0.158692	-1.66799	-1.66799
5wF	2	1	1	0.840858	1.66463	0.767948	1.19676	1.19676	0.870922	1.14551	1.90914	0.883703	2.02798	2.02798
1wF	2	0	1	0.613171	0.460659	0.533787	0.135355	0.135355	0.587932	0.283691	0.355422	0.717793	0.933539	0.933539
1wF	2	0	0	0.0913817	-2.29688	0.0762421	-2.49454	-2.49454	0.0590949	-1.47158	-2.7677	0.138808	-1.82522	-1.82522
1wF	2	0	0	0.0451228	-3.0522	0.0293171	-3.49983	-3.49983	0.0431824	-1.64946	-3.09818	0.0628688	-2.70177	-2.70177
1wM	2	0	0	0.418629	-0.328404	0.448526	-0.206628	-0.206628	0.431697	-0.0649128	-0.274932	0.375664	-0.507993	-0.507994
5wM	2	1	0	0.140803	-1.80864	0.236249	-1.17335	-1.17335	0.159312	-0.834312	-1.66336	0.0268471	-3.59038	-3.59038
1wF	3	0	0	0.137298	-1.83792	0.242548	-1.13876	-1.13876	0.138722	-1.11202	-1.82595	0.0306234	-3.45489	-3.45489
1wF	3	0	1	0.605646	0.429048	0.641584	0.582244	0.582244	0.730077	0.614252	0.995015	0.445278	-0.219768	-0.219768
5wM	3	1	0	0.0487297	-2.97151	0.0752341	-2.50894	-2.50894	0.0647538	-1.62867	-2.67022	0.00620134	-5.07677	-5.07677
5wM	3	1	1	0.733549	1.0127	0.95405	3.03317	3.03317	0.707672	0.546383	0.884104	0.538924	0.156013	0.156013
1wM	3	0	0	0.0992628	-2.20544	0.185727	-1.47802	-1.47802	0.0902039	-1.40894	-2.31115	0.0218576	-3.80111	-3.80111
5wF	3	1	1	0.642601	0.58667	0.488871	-0.0445233	-0.0445233	0.593495	0.235266	0.378434	0.845436	1.69924	1.69924
1wM	3	0	1	0.507172	0.0286919	0.412375	-0.354156	-0.354156	0.377912	-0.302805	-0.498421	0.731231	1.00088	1.00088
5wM	3	1	1	0.602567	0.416171	0.659708	0.661993	0.661993	0.766704	0.733417	1.18979	0.381288	-0.484083	-0.484083
1wM	3	0	0	0.117239	-2.01884	0.0610157	-2.73367	-2.73367	0.143232	-1.08923	-1.7887	0.14747	-1.75459	-1.75459
5wF	3	1	1	0.889467	2.08531	0.813636	1.47381	1.47381	0.87362	1.18764	1.93335	0.981146	3.952	3.952
1wM	3	0	0	0.043721	-3.08522	0.00514898	-5.26379	-5.26379	0.119813	-1.21499	-1.99421	0.00620134	-5.07677	-5.07677
5wF	3	1	1	0.630929	0.536205	0.687765	0.789689	0.789689	0.792566	0.825553	1.34046	0.412457	-0.353819	-0.353819
1wM	3	0	1	0.890086	2.09162	0.877863	1.97234	1.97234	0.893349	1.30498	2.12542	0.899045	2.18666	2.18666
1wF	3	0	0	0.0364507	-3.27466	0.0332374	-3.37028	-3.37028	0.0699133	-1.57837	-2.58802	0.00620134	-5.07677	-5.07677
5wM	3	1	1	0.566463	0.267434	0.494523	-0.021907	-0.021907	0.476063	-0.0532841	-0.0958225	0.728802	0.988554	0.988554
5wF	3	1	1	0.633948	0.549191	0.554092	0.217219	0.217219	0.603581	0.260102	0.420408	0.74417	1.06776	1.06776
5wF	3	1	1	0.850139	1.73569	0.753568	1.11774	1.11774	0.852044	1.07613	1.75073	0.944805	2.8401	2.8401
5wM	3	1	1	0.724072	0.964752	0.709729	0.894067	0.894067	0.7956	0.836894	1.35902	0.666888	0.694144	0.694144
5wF	3	1	1	0.684837	0.77609	0.626056	0.515336	0.515336	0.715226	0.568901	0.920901	0.713229	0.911117	0.911117
1wF	3	0	0	0.0417125	-3.13435	0.0532418	-2.8782	-2.8782	0.0612356	-1.6935	-2.72984	0.0106601	-4.53053	-4.53053
1wF	3	0	0	0.216744	-1.28474	0.335268	-0.684453	-0.684453	0.240932	-0.696895	-1.14758	0.0740312	-2.52635	-2.52635
1wM	3	0	0	0.215259	-1.29351	0.181267	-1.50779	-1.50779	0.135139	-1.13058	-1.85627	0.329372	-0.711026	-0.711025
5wM	3	1	1	0.637955	0.5665	0.583856	0.338623	0.338623	0.627524	0.318809	0.52161	0.702485	0.859162	0.859162
5wF	3	1	1	0.868579	1.88845	0.879004	1.98304	1.98304	0.890053	1.28412	2.09129	0.83668	1.63373	1.63373
1wF	3	0	1	0.650065	0.619323	0.671252	0.713855	0.713855	0.777969	0.772607	1.25387	0.500972	0.00388888	0.0038889
1wM	3	0	0	0.093099	-2.27637	0.139836	-1.81665	-1.81665	0.0939856	-1.38126	-2.26591	0.0454756	-3.04404	-3.04404
5wM	3	1	1	0.880539	1.99755	0.797438	1.37036	1.37036	0.877815	1.21118	1.9719	0.966365	3.35798	3.35798
1wM	3	0	1	0.658252	0.655514	0.537761	0.151332	0.151332	0.562515	0.158859	0.251375	0.87448	1.94116	1.94116
5wM	3	1	1	0.92607	2.52783	0.886486	2.05534	2.05534	0.899425	1.34499	2.19085	0.992298	4.85854	4.85854
1wM	3	0	0	0.100935	-2.18688	0.186997	-1.46964	-1.46964	0.0939515	-1.3815	-2.26631	0.0218576	-3.80111	-3.80111
5wF	3	1	1	0.667168	0.695403	0.575374	0.303812	0.303812	0.641572	0.353007	0.582193	0.784557	1.29242	1.29242
1wF	3	0	0	0.0766759	-2.48839	0.00844639	-4.76553	-4.76553	0.136276	-1.12464	-1.84657	0.0853052	-2.37235	-2.37235
1wM	3	0	0	0.0943758	-2.26134	0.039709	-3.18566	-3.18566	0.163436	-0.993878	-1.63288	0.0799824	-2.44259	-2.44259
5wM	3	1	1	0.928505	2.56395	0.900795	2.20609	2.20609	0.896973	1.32859	2.16404	0.987748	4.38972	4.38972
1wF	3	0	0	0.476217	-0.0952055	0.503185	0.0127419	0.0127419	0.47008	-0.0679794	-0.119823	0.455384	-0.178939	-0.178939
5wF	4	1	1	0.909789	2.31106	0.838619	1.64799	1.64799	0.89664	1.33874	2.16043	0.994109	5.12847	5.12847
1wM	4	0	1	0.929208	2.57458	0.997007	5.80836	5.80836	0.808805	0.907324	1.44226	0.981811	3.98858	3.98857
5wM	4	1	1	0.855482	1.77826	0.793313	1.34501	1.34501	0.837075	1.02408	1.63662	0.936058	2.6837	2.6837
5wF	4	1	1	0.609293	0.444341	0.553122	0.213291	0.213291	0.570033	0.208622	0.281985	0.704725	0.8699	0.869899
5wF	4	1	1	0.926109	2.5284	0.913187	2.35319	2.35319	0.880451	1.24033	1.99671	0.984689	4.16379	4.16379
1wM	4	0	0	0.0841335	-2.38747	0.166882	-1.60789	-1.60789	0.0722905	-1.49664	-2.55203	0.0132276	-4.31213	-4.31213
5wM	4	1	1	0.935173	2.669	0.995462	5.39063	5.39063	0.828245	0.986015	1.57324	0.981811	3.98858	3.98857
5wM	4	1	1	0.859056	1.80747	0.913905	2.36228	2.36228	0.82939	0.99086	1.58131	0.833872	1.61332	1.61332
1wM	4	0	0	0.12862	-1.91321	0.0049436	-5.30471	-5.30471	0.334479	-0.38358	-0.687998	0.0464382	-3.02208	-3.02208
5wF	4	1	1	0.903544	2.23724	0.856433	1.78597	1.78597	0.877694	1.22475	1.97077	0.976507	3.72726	3.72726
1wM	4	0	0	0.115402	-2.03671	0.146015	-1.7662	-1.7662	0.121329	-1.15228	-1.9799	0.0788609	-2.45792	-2.45792
5wF	4	1	1	0.920827	2.45364	0.939875	2.74933	2.74933	0.861277	1.13776	1.82594	0.961329	3.21323	3.21323
5wF	4	1	1	0.514855	0.0594367	0.670432	0.710139	0.710139	0.745257	0.685516	1.07347	0.128876	-1.91093	-1.91093
1wM	4	0	0	0.154479	-1.6999	0.261992	-1.03564	-1.03564	0.119748	-1.16126	-1.99482	0.0816965	-2.41952	-2.41952
5wM	4	1	1	0.92866	2.56628	0.995528	5.40543	5.40543	0.808641	0.906686	1.4412	0.981811	3.98858	3.98857
1wM	4	0	0	0.0558463	-2.82769	0.0139978	-4.25476	-4.25476	0.102789	-1.26466	-2.16661	0.0507517	-2.92873	-2.92873
5wM	4	1	1	0.919544	2.43617	0.99972	8.18085	8.18085	0.777101	0.791036	1.24885	0.981811	3.98858	3.98857
5wM	4	1	1	0.888925	2.07981	0.843992	1.68823	1.68823	0.854409	1.10393	1.7696	0.968374	3.42165	3.42165
1wF	4	0	0	0.17487	-1.5515	0.273109	-0.978908	-0.978908	0.14408	-1.03305	-1.78181	0.107422	-2.11735	-2.11735
5wM	4	1	1	0.868997	1.89212	0.824063	1.54412	1.54412	0.849246	1.07937	1.7287	0.933683	2.64469	2.64469
1wF	4	0	0	0.0637599	-2.68675	0.11368	-2.05369	-2.05369	0.0614626	-1.60129	-2.72589	0.0161368	-4.11039	-4.11039
1wM	4	0	1	0.504572	0.0182901	0.264813	-1.0211	-1.0211	0.353014	-0.331195	-0.605818	0.895891	2.15238	2.15238
1wM	4	0	1	0.575572	0.304621	0.516717	0.0668925	0.0668925	0.469375	-0.0344308	-0.122654	0.740623	1.04921	1.04921
5wM	4	1	1	0.874562	1.94191	0.968161	3.41472	3.41472	0.800163	0.874296	1.38731	0.855362	1.77729	1.77729
1wF	4	0	0	0.464538	-0.142086	0.580457	0.324651	0.324651	0.590409	0.258055	0.365655	0.222748	-1.24972	-1.24972
1wM	4	0	0	0.0658603	-2.65209	0.125048	-1.94547	-1.94547	0.0623445	-1.59215	-2.71071	0.0101886	-4.57624	-4.57624
5wM	4	1	1	0.878177	1.97528	0.792374	1.3393	1.3393	0.856875	1.11592	1.78957	0.985284	4.20397	4.20398
1wM	4	0	1	0.674534	0.728764	0.515244	0.0609939	0.0609939	0.591712	0.261217	0.371048	0.916646	2.39762	2.39762
1wM	4	0	1	0.82451	1.54721	0.695579	0.826333	0.826333	0.792668	0.846503	1.34109	0.985284	4.20397	4.20398
1wM	4	0	0	0.0513824	-2.91571	0.0794542	-2.44979	-2.44979	0.0614298	-1.60163	-2.72646	0.0132633	-4.3094	-4.3094
1wM	4	0	1	0.851358	1.74529	0.718502	0.937045	0.937045	0.859599	1.12936	1.81196	0.975973	3.70426	3.70426
5wM	4	1	1	0.891487	2.10602	0.972963	3.58312	3.58312	0.764305	0.747469	1.17643	0.937193	2.70282	2.70282
5wF	4	1	1	0.820372	1.51887	0.730305	0.996172	0.996172	0.794754	0.854162	1.35382	0.936058	2.6837	2.6837
1wM	4	0	1	0.731334	1.0014	0.536379	0.145776	0.145776	0.67823	0.488212	0.745649	0.979392	3.86126	3.86125
1wM	4	0	0	0.179322	-1.52095	0.215257	-1.29353	-1.29353	0.104709	-1.25224	-2.14596	0.218001	-1.27735	-1.27735
5wM	5	1	1	0.895378	2.14689	0.888369	2.07419	2.07419	0.883251	1.19626	2.02358	0.914515	2.37005	2.37005
5wF	5	1	1	0.933332	2.63904	0.941416	2.77692	2.77692	0.883699	1.19876	2.02793	0.974882	3.65873	3.65873
1wF	5	0	1	0.776525	1.24553	0.711063	0.900551	0.900551	0.8433	1.00099	1.68299	0.775211	1.23797	1.23797
1wF	5	0	0	0.0673352	-2.62836	0.013638	-4.28116	-4.28116	0.128481	-1.06567	-1.91446	0.0598868	-2.75354	-2.75354
5wM	5	1	1	0.588632	0.358313	0.543884	0.175989	0.175989	0.524313	0.0903044	0.0973302	0.697698	0.836361	0.836361
1wF	5	0	1	0.671648	0.715649	0.642738	0.587266	0.587266	0.737134	0.626866	1.03113	0.635072	0.55404	0.55404
1wM	5	0	0	0.0761037	-2.4965	0.00248397	-5.99541	-5.99541	0.162813	-0.906495	-1.63744	0.063014	-2.69931	-2.69931
5wM	5	1	1	0.908732	2.29825	0.836501	1.63242	1.63242	0.905336	1.33081	2.25797	0.98436	4.14216	4.14215
5wM	5	1	1	0.905787	2.26325	0.989412	4.53734	4.53734	0.849029	1.02622	1.72701	0.878921	1.98225	1.98225
5wM	5	1	0	0.144775	-1.77619	0.265007	-1.02011	-1.02011	0.125811	-1.07949	-1.93851	0.0435068	-3.09036	-3.09036
5wF	5	1	1	0.914412	2.36874	0.832674	1.6047	1.6047	0.923976	1.46855	2.49764	0.986587	4.29803	4.29803
1wF	5	0	1	0.802134	1.39969	0.68948	0.797691	0.797691	0.833005	0.957464	1.60707	0.883918	2.03007	2.03007
5wM	5	1	1	0.89388	2.131	0.854536	1.77063	1.77063	0.883891	1.19983	2.0298	0.943212	2.80997	2.80997
5wF	5	1	1	0.561122	0.245717	0.512701	0.0508142	0.0508142	0.519252	0.0786522	0.0770443	0.651414	0.625258	0.625258
5wM	5	1	1	0.910852	2.32408	0.997126	5.84924	5.84924	0.856509	1.06037	1.78659	0.878921	1.98225	1.98225
1wF	5	0	0	0.291569	-0.887776	0.416375	-0.337671	-0.337671	0.341035	-0.35152	-0.658684	0.117296	-2.01829	-2.01829
5wM	5	1	1	0.917478	2.40856	0.98435	4.14154	4.14154	0.820851	0.908754	1.52213	0.947232	2.88765	2.88765
5wM	5	1	1	0.92215	2.47193	0.961757	3.22481	3.22481	0.857462	1.06483	1.79437	0.947232	2.88765	2.88765
1wF	5	0	0	0.203685	-1.36342	0.334832	-0.686412	-0.686412	0.2299	-0.660238	-1.20888	0.0463221	-3.02471	-3.02471
5wF	5	1	0	0.345077	-0.64075	0.513789	0.05517	0.05517	0.446135	-0.0900389	-0.216301	0.0753076	-2.50788	-2.50788
1wM	5	0	0	0.122633	-1.96773	0.0794776	-2.44947	-2.44947	0.121674	-1.10142	-1.97667	0.166746	-1.60886	-1.60886
5wM	5	1	0	0.357994	-0.584083	0.531229	0.12508	0.12508	0.467444	-0.0405665	-0.130407	0.0753076	-2.50788	-2.50788
1wM	5	0	1	0.902235	2.2223	0.955145	3.05842	3.05842	0.841198	0.991916	1.66717	0.910361	2.31805	2.31805
1wM	5	0	0	0.0654021	-2.65956	0.0233666	-3.7328	-3.7328	0.112953	-1.14983	-2.06093	0.0598868	-2.75354	-2.75354
1wM	5	0	0	0.19489	-1.41855	0.0871807	-2.34855	-2.34855	0.0825315	-1.34951	-2.40844	0.414957	-0.343511	-0.343511
5wF	5	1	1	0.745128	1.07279	0.545322	0.181789	0.181789	0.768745	0.724584	1.20124	0.921316	2.46037	2.46037
1wF	5	0	0	0.147355	-1.7555	0.13617	-1.84747	-1.84747	0.146073	-0.980215	-1.76574	0.159822	-1.65955	-1.65955
1wM	5	0	1	0.664479	0.683318	0.501539	0.00615489	0.00615489	0.616748	0.303946	0.475766	0.87515	1.94728	1.94729
5wF	5	1	0	0.213422	-1.30442	0.377103	-0.501862	-0.501862	0.246583	-0.6074	-1.11692	0.0165803	-4.08282	-4.08282
5wF	5	1	1	0.918509	2.42226	0.889892	2.08964	2.08964	0.931197	1.53042	2.60523	0.934436	2.65692	2.65692
1wF	5	0	0	0.130471	-1.8968	0.0761314	-2.49611	-2.49611	0.0948275	-1.26196	-2.25607	0.220453	-1.26303	-1.26303
5wF	5	1	1	0.915184	2.37864	0.858131	1.79985	1.79985	0.928467	1.50635	2.56337	0.958953	3.15113	3.15113
1wF	5	0	0	0.0783446	-2.46505	0.00251841	-5.98161	-5.98161	0.211096	-0.723132	-1.31833	0.0214194	-3.8218	-3.8218
1wF	5	0	0	0.0885866	-2.33102	0.017697	-4.0165	-4.0165	0.14992	-0.962683	-1.73523	0.098143	-2.21803	-2.21803
1wF	5	0	0	0.215551	-1.29178	1.42571e-06	-13.4608	-13.4608	0.583638	0.227438	0.337726	0.063014	-2.69931	-2.69931

## Sheet: Video_classification _Logits
SampleID	Label	Test idx	Raw Pred	Fold	Pred
CS_1 week female_05_C11440_30s-Control4.avi	1 week female	9	0.266991	1	0
CS_1 week female_10_C11440_30s-Control9.avi	1 week female	15	0.532461	1	1
CS_1 week female_11_C11440_30s-Control10.avi	1 week female	16	0.259246	1	0
CS_1 week male_01_C11440_30s-Control1.avi	1 week male	18	0.352796	1	0
CS_1 week male_02_C11440_30s-Control2.avi	1 week male	19	0.261682	1	0
w1118_1w1_01_C11440_30s-Control0.avi	1 week female	25	0.398498	1	0
w1118_1 week female_01_C11440_30s-Control45.avi	1 week female	30	0.131508	1	0
w1118_1 week female_11_C11440_30s-Control35.avi	1 week female	45	0.243349	1	0
w1118_1 week female_24_C11440_30s-Control51.avi	1 week female	60	0.976505	1	1
w1118_1 week female_30_C11440_30s-Control57.avi	1 week female	66	0.206877	1	0
w1118_1 week male_05_C11440_30s-Control18.avi	1 week male	73	0.689133	1	1
w1118_1 week male_12_C11440_30s-Control11.avi	1 week male	82	0.138954	1	0
w1118_1 week male_14_C11440_30s-Control13.avi	1 week male	84	0.173728	1	0
w1118_1 week male_23_C11440_30s-Control22.avi	1 week male	93	0.265698	1	0
CS_1 week female_01_C11440_30s-Control0.avi	1 week female	96	0.220324	1	0
CS_1 week female_06_C11440_30s-Control13.avi	1 week female	101	0.208228	1	0
CS_1 week male_01_C11440_30s-Control1.avi	1 week male	104	0.352796	1	0
CS_1 week male_05_C11440_30s-Control6.avi	1 week male	108	0.272135	1	0
DocumentsWTLDALFP1_5wf_01_C11440_30s2.avi	5wF	112	0.983669	1	1
DocumentsWTLDALFP1_5wf_02_C11440_30s2.avi	5wF	113	0.999958	1	1
DocumentsWTLDALFP1_5 week male_02_C11440_30s12.avi	5 week male	118	0.987145	1	1
DocumentsWTLDALFP1_5 week male_03_C11440_30s13.avi	5 week male	119	0.996644	1	1
DocumentsWTLDALFP5_5 week male_01_C11440_30s89.avi	5 week male	125	0.965708	1	1
DocumentsWTLDALFP5_5 week male_02_C11440_30s90.avi	5 week male	126	0.875218	1	1
DocumentsWTLDALFP5_5 week male_03_C11440_30s91.avi	5 week male	127	0.984272	1	1
DocumentsWTLDALFP1_5 week male_05_C11440_30s15.avi	5 week male	137	0.876624	1	1
DocumentsWTLDALFP5_5 week male_01_C11440_30s89.avi	5 week male	143	0.965708	1	1
DocumentsWTLDALFP5_5 week male_02_C11440_30s90.avi	5 week male	144	0.875218	1	1
DocumentsWTLDALFP5_5 week male_04_C11440_30s92.avi	5 week male	146	0.712329	1	1
DocumentsWTLDALFP5_5 week male_05_C11440_30s93.avi	5 week male	147	0.32514	1	0
DocumentsWTLDTRFP1_5wf_03_C11440_30s8.avi	5wF	150	0.811678	1	1
DocumentsWTLDTRFP1_5 week male_02_C11440_30s17.avi	5 week male	154	0.999947	1	1
DocumentsWTLDTRFP5_5wf_02_C11440_30s85.avi	5wF	159	0.987984	1	1
DocumentsWTLDTRFP5_5wf_05_C11440_30s88.avi	5wF	162	0.850809	1	1
WTLDALFP1_5wf_04_C11440_30s4.avi	5wF	170	0.991684	1	1
WTLDALFP1_5 week male_04_C11440_30s14.avi	5 week male	175	0.999531	1	1
WTLDALFP5_5wf_02_C11440_30s80.avi	5wF	178	0.997106	1	1
WTLDALFP5_5wf_05_C11440_30s83.avi	5wF	181	0.968019	1	1
WTLDALFP5_5 week male_04_C11440_30s92.avi	5 week male	185	0.712329	1	1
HW1118_1 week male_01_C11440_30s1.avi	1 week male	194	0.236755	1	0
HW1118_1 week male_03_C11440_30s4.avi	1 week male	196	0.257049	1	0
HW1118_1 week male_05_C11440_30s6.avi	1 week male	198	0.252865	1	0
HW1118_1 week male_07_C11440_30s8.avi	1 week male	200	0.281354	1	0
HW1118_1 week female_04_C11440_30s28.avi	1 week female	205	0.272005	1	0
HW1118_1 week male_07_C11440_30s24.avi	1 week male	215	0.258718	1	0
DocumentsWTLDTRFP1_5 week male_01_C11440_30s16.avi	5 week male	218	0.996152	1	1
DocumentsWTLDTRFP5_5 week male_04_C11440_30s97.avi	5 week male	226	0.992188	1	1
CS_1 week female_03_C11440_30s-Control2.avi	1 week female	5	0.119444	2	0
CS_1 week female_06_C11440_30s-Control13.avi	1 week female	10	0.126847	2	0
CS_1 week female_07_C11440_30s-Control6.avi	1 week female	12	0.0339396	2	0
CS_1 week male_06_C11440_30s-Control7.avi	1 week male	24	0.0035757	2	0
w1118_1 week female_01_C11440_30s-Control20.avi	1 week female	28	0.00314719	2	0
w1118_1 week female_01_C11440_30s-Control25.avi	1 week female	29	0.00720886	2	0
w1118_1 week female_02_C11440_30s-Control21.avi	1 week female	31	0.0077997	2	0
w1118_1 week female_04_C11440_30s-Control28.avi	1 week female	35	0.0499108	2	0
w1118_1 week female_06_C11440_30s-Control24.avi	1 week female	38	0.00712487	2	0
w1118_1 week female_07_C11440_30s-Control31.avi	1 week female	41	0.0647351	2	0
w1118_1 week female_08_C11440_30s-Control32.avi	1 week female	42	0.00535587	2	0
w1118_1 week female_17_C11440_30s-Control41.avi	1 week female	51	0.0182344	2	0
w1118_1 week female_20_C11440_30s-Control44.avi	1 week female	55	0.000795462	2	0
w1118_1 week female_20_C11440_30s-Control47.avi	1 week female	56	0.0611579	2	0
w1118_1 week female_29_C11440_30s-Control56.avi	1 week female	65	0.0309972	2	0
w1118_1 week female_31_C11440_30s-Control58.avi	1 week female	67	0.0693248	2	0
w1118_1 week male_01_C11440_30s-Control14.avi	1 week male	68	0.0149716	2	0
w1118_1 week male_02_C11440_30s-Control15.avi	1 week male	69	0.00078982	2	0
w1118_1 week male_06_C11440_30s-Control19.avi	1 week male	75	0.00421075	2	0
w1118_1 week male_06_C11440_30s-Control5.avi	1 week male	76	0.124403	2	0
w1118_1 week male_09_C11440_30s-Control8.avi	1 week male	79	0.00475896	2	0
w1118_1 week male_16_C11440_30s-Control15.avi	1 week male	86	0.00344657	2	0
w1118_1 week male_25_C11440_30s-Control24.avi	1 week male	95	0.0100772	2	0
CS_1 week female_01_C11440_30s-Control8.avi	1 week female	97	0.00278012	2	0
CS_1 week male_06_C11440_30s-Control7.avi	1 week male	109	0.0035757	2	0
DocumentsWTLDALFP1_5wf_03_C11440_30s3.avi	5wF	114	0.51083	2	1
DocumentsWTLDALFP1_5wf_04_C11440_30s4.avi	5wF	115	0.468747	2	0
DocumentsWTLDALFP1_5 week male_01_C11440_30s11.avi	5 week male	117	0.601976	2	1
DocumentsWTLDALFP1_5 week male_04_C11440_30s14.avi	5 week male	120	0.588717	2	1
DocumentsWTLDALFP5_5wf_03_C11440_30s81.avi	5wF	124	0.466519	2	0
DocumentsWTLDALFP1_5wf_05_C11440_30s5.avi	5wF	132	0.544817	2	1
DocumentsWTLDALFP1_5 week male_04_C11440_30s14.avi	5 week male	136	0.588717	2	1
DocumentsWTLDALFP5_5wf_02_C11440_30s80.avi	5wF	139	0.528193	2	1
DocumentsWTLDALFP5_5wf_03_C11440_30s81.avi	5wF	140	0.466519	2	0
DocumentsWTLDALFP5_5wf_05_C11440_30s83.avi	5wF	142	0.430949	2	0
DocumentsWTLDTRFP1_5 week male_01_C11440_30s16.avi	5 week male	153	0.517529	2	1
DocumentsWTLDTRFP1_5 week male_03_C11440_30s18.avi	5 week male	155	0.430657	2	0
WTLDALFP1_5wf_02_C11440_30s2.avi	5wF	168	0.496118	2	0
WTLDALFP5_5 week male_02_C11440_30s90.avi	5 week male	183	0.402774	2	0
WTLDALFP5_5 week male_05_C11440_30s93.avi	5 week male	186	0.479346	2	0
HW1118_1 week female_07_C11440_30s16.avi	1 week female	193	0.0514282	2	0
HW1118_1 week male_02_C11440_30s3.avi	1 week male	195	0.00441247	2	0
HW1118_1 week male_06_C11440_30s7.avi	1 week male	199	0.00722754	2	0
DocumentsWTLDTRFP1_5 week male_02_C11440_30s17.avi	5 week male	219	0.487172	2	0
WTLDALFP1_5 week male_02_C11440_30s12.avi	5 week male	228	0.551151	2	1
WTLDALFP1_5 week male_03_C11440_30s13.avi	5 week male	229	0.558618	2	1
CS_1 week female_01_C11440_30s-Control0.avi	1 week female	0	0.051766	3	0
CS_1 week female_02_C11440_30s-Control1.avi	1 week female	2	0.0867033	3	0
CS_1 week female_03_C11440_30s-Control10.avi	1 week female	4	0.0688668	3	0
CS_1 week female_04_C11440_30s-Control11.avi	1 week female	6	0.387575	3	0
CS_1 week female_06_C11440_30s-Control5.avi	1 week female	11	0.154582	3	0
CS_1 week male_05_C11440_30s-Control5.avi	1 week male	22	0.0508488	3	0
w1118_1w1_02_C11440_30s-Control1.avi		26	0.016368	3	0
w1118_1w1_04_C11440_30s-Control3.avi		27	0.0342854	3	0
w1118_1 week female_02_C11440_30s-Control26.avi	1 week female	32	0.143032	3	0
w1118_1 week female_03_C11440_30s-Control22.avi	1 week female	33	0.12839	3	0
w1118_1 week female_05_C11440_30s-Control23.avi	1 week female	36	0.0742837	3	0
w1118_1 week female_12_C11440_30s-Control36.avi	1 week female	46	0.26996	3	0
w1118_1 week female_25_C11440_30s-Control52.avi	1 week female	61	0.105481	3	0
w1118_1 week female_26_C11440_30s-Control53.avi	1 week female	62	0.0457712	3	0
w1118_1 week female_28_C11440_30s-Control55.avi	1 week female	64	0.0191425	3	0
w1118_1 week male_03_C11440_30s-Control16.avi	1 week male	70	0.0345521	3	0
w1118_1 week male_07_C11440_30s-Control6.avi	1 week male	77	0.0373996	3	0
w1118_1 week male_08_C11440_30s-Control7.avi	1 week male	78	0.0493903	3	0
w1118_1 week male_15_C11440_30s-Control14.avi	1 week male	85	0.0908212	3	0
w1118_1 week male_20_C11440_30s-Control19.avi	1 week male	90	0.105198	3	0
CS_1 week female_02_C11440_30s-Control1.avi	1 week female	98	0.0867033	3	0
CS_1 week female_05_C11440_30s-Control4.avi	1 week female	100	0.0506671	3	0
w1118_1 week male_17_C11440_30s-Control16.avi	1 week male	111	0.0606736	3	0
DocumentsWTLDALFP5_5wf_01_C11440_30s79.avi	5wF	122	0.856639	3	1
DocumentsWTLDALFP1_5wf_01_C11440_30s2.avi	5wF	128	0.997844	3	1
DocumentsWTLDALFP1_5 week male_03_C11440_30s13.avi	5 week male	135	0.990647	3	1
DocumentsWTLDALFP5_5wf_01_C11440_30s79.avi	5wF	138	0.856639	3	1
DocumentsWTLDALFP5_5wf_04_C11440_30s82.avi	5wF	141	0.0397174	3	0
DocumentsWTLDTRFP1_5wf_05_C11440_30s10.avi	5wF	152	0.134012	3	0
DocumentsWTLDTRFP1_5 week male_04_C11440_30s19.avi	5 week male	156	0.219773	3	0
DocumentsWTLDTRFP5_5wf_01_C11440_30s84.avi	5wF	158	0.0263411	3	0
DocumentsWTLDTRFP5_5wf_04_C11440_30s87.avi	5wF	161	0.098384	3	0
DocumentsWTLDTRFP5_5 week male_02_C11440_30s95.avi	5 week male	164	0.916149	3	1
DocumentsWTLDTRFP5_5 week male_03_C11440_30s96.avi	5 week male	165	0.0431179	3	0
WTLDALFP1_5 week male_01_C11440_30s11.avi	5 week male	172	0.997134	3	1
WTLDALFP1_5 week male_02_C11440_30s12.avi	5 week male	173	0.996181	3	1
WTLDALFP1_5 week male_05_C11440_30s15.avi	5 week male	176	0.98089	3	1
WTLDALFP5_5wf_04_C11440_30s82.avi	5wF	180	0.039712	3	0
WTLDALFP5_5 week male_01_C11440_30s89.avi	5 week male	182	0.98768	3	1
WTLDALFP5_5 week male_03_C11440_30s91.avi	5 week male	184	0.93288	3	1
HW1118_1 week female_06_C11440_30s30.avi	1 week female	207	0.0136062	3	0
HW1118_1 week male_04_C11440_30s21.avi	1 week male	212	0.00228924	3	0
DocumentsWTLDTRFP1_5 week male_03_C11440_30s18.avi	5 week male	220	0.956887	3	1
DocumentsWTLDTRFP1_5 week male_04_C11440_30s19.avi	5 week male	221	0.219773	3	0
DocumentsWTLDTRFP1_5 week male_05_C11440_30s20.avi	5 week male	222	0.967009	3	1
DocumentsWTLDTRFP5_5 week male_03_C11440_30s96.avi	5 week male	225	0.0431179	3	0
CS_1 week female_02_C11440_30s-Control9.avi	1 week female	3	0.113846	4	0
CS_1 week female_04_C11440_30s-Control3.avi	1 week female	7	0.703684	4	1
CS_1 week female_05_C11440_30s-Control12.avi	1 week female	8	0.768123	4	1
CS_1 week female_08_C11440_30s-Control7.avi	1 week female	13	0.235048	4	0
CS_1 week female_12_C11440_30s-Control11.avi	1 week female	17	0.348205	4	0
CS_1 week male_05_C11440_30s-Control6.avi	1 week male	23	0.0490288	4	0
w1118_1 week female_03_C11440_30s-Control27.avi	1 week female	34	0.113114	4	0
w1118_1 week female_06_C11440_30s-Control30.avi	1 week female	39	0.0576703	4	0
w1118_1 week female_07_C11440_30s-Control25.avi	1 week female	40	0.12336	4	0
w1118_1 week female_09_C11440_30s-Control33.avi	1 week female	43	0.000285548	4	0
w1118_1 week female_10_C11440_30s-Control34.avi	1 week female	44	0.456132	4	0
w1118_1 week female_13_C11440_30s-Control37.avi	1 week female	47	0.868185	4	1
w1118_1 week female_15_C11440_30s-Control39.avi	1 week female	49	0.611876	4	1
w1118_1 week female_19_C11440_30s-Control43.avi	1 week female	53	0.0184117	4	0
w1118_1 week female_23_C11440_30s-Control50.avi	1 week female	59	0.653874	4	1
w1118_1 week male_04_C11440_30s-Control17.avi	1 week male	72	0.0137016	4	0
w1118_1 week male_10_C11440_30s-Control9.avi	1 week male	80	0.00659388	4	0
w1118_1 week male_11_C11440_30s-Control10.avi	1 week male	81	0.000402735	4	0
w1118_1 week male_13_C11440_30s-Control12.avi	1 week male	83	0.00403373	4	0
w1118_1 week male_19_C11440_30s-Control18.avi	1 week male	89	0.150836	4	0
w1118_1 week male_21_C11440_30s-Control20.avi	1 week male	91	0.038131	4	0
w1118_1 week male_24_C11440_30s-Control23.avi	1 week male	94	0.0704721	4	0
CS_1 week male_02_C11440_30s-Control2.avi	1 week male	105	0.0107768	4	0
w1118_1 week male_01_C11440_30s-Control14.avi	1 week male	110	0.00738845	4	0
DocumentsWTLDALFP5_5wf_02_C11440_30s80.avi	5wF	123	0.941855	4	1
DocumentsWTLDALFP1_5wf_04_C11440_30s4.avi	5wF	131	0.937632	4	1
DocumentsWTLDALFP1_5 week male_01_C11440_30s11.avi	5 week male	133	0.9562	4	1
DocumentsWTLDALFP1_5 week male_02_C11440_30s12.avi	5 week male	134	0.865256	4	1
DocumentsWTLDALFP5_5 week male_03_C11440_30s91.avi	5 week male	145	0.882125	4	1
DocumentsWTLDTRFP1_5wf_01_C11440_30s6.avi	5wF	148	0.9784	4	1
DocumentsWTLDTRFP5_5 week male_01_C11440_30s94.avi	5 week male	163	0.767305	4	1
DocumentsWTLDTRFP5_5 week male_04_C11440_30s97.avi	5 week male	166	0.825689	4	1
WTLDALFP1_5wf_01_C11440_30s2.avi	5wF	167	0.914091	4	1
WTLDALFP1_5wf_05_C11440_30s5.avi	5wF	171	0.973169	4	1
WTLDALFP5_5wf_01_C11440_30s79.avi	5wF	177	0.8095	4	1
HW1118_1 week female_04_C11440_30s13.avi	1 week female	190	0.287722	4	0
HW1118_1 week female_06_C11440_30s15.avi	1 week female	192	0.0021588	4	0
HW1118_1 week male_04_C11440_30s5.avi	1 week male	197	0.000721003	4	0
HW1118_1 week male_08_C11440_30s9.avi	1 week male	201	0.160474	4	0
HW1118_1 week female_03_C11440_30s27.avi	1 week female	204	0.451253	4	0
HW1118_1 week female_05_C11440_30s29.avi	1 week female	206	0.0123218	4	0
HW1118_1 week female_07_C11440_30s_damaged31.avi	1 week female	208	0.0533574	4	0
HW1118_1 week male_01_C11440_30s18.avi	1 week male	209	0.0108355	4	0
HW1118_1 week male_03_C11440_30s20.avi	1 week male	211	0.00186674	4	0
HW1118_1 week male_05_C11440_30s22.avi	1 week male	213	0.000529063	4	0
DocumentsWTLDTRFP5_5 week male_02_C11440_30s95.avi	5 week male	224	0.837265	4	1
CS_1 week female_01_C11440_30s-Control8.avi	1 week female	1	0.0690935	5	0
CS_1 week female_09_C11440_30s-Control8.avi	1 week female	14	0.742475	5	1
CS_1 week male_03_C11440_30s-Control3.avi	1 week male	20	0.94064	5	1
CS_1 week male_04_C11440_30s-Control4.avi	1 week male	21	0.0792374	5	0
w1118_1 week female_05_C11440_30s-Control29.avi	1 week female	37	0.182315	5	0
w1118_1 week female_14_C11440_30s-Control38.avi	1 week female	48	0.063232	5	0
w1118_1 week female_16_C11440_30s-Control40.avi	1 week female	50	0.0334347	5	0
w1118_1 week female_18_C11440_30s-Control42.avi	1 week female	52	0.118036	5	0
w1118_1 week female_19_C11440_30s-Control46.avi	1 week female	54	0.0643792	5	0
w1118_1 week female_21_C11440_30s-Control48.avi	1 week female	57	0.257408	5	0
w1118_1 week female_22_C11440_30s-Control49.avi	1 week female	58	0.696586	5	1
w1118_1 week female_27_C11440_30s-Control54.avi	1 week female	63	0.0514516	5	0
w1118_1 week male_03_C11440_30s-Control2.avi	1 week male	71	0.0165591	5	0
w1118_1 week male_05_C11440_30s-Control4.avi	1 week male	74	0.0439626	5	0
w1118_1 week male_17_C11440_30s-Control16.avi	1 week male	87	0.0873204	5	0
w1118_1 week male_18_C11440_30s-Control17.avi	1 week male	88	0.0866381	5	0
w1118_1 week male_22_C11440_30s-Control21.avi	1 week male	92	0.372053	5	0
CS_1 week female_02_C11440_30s-Control9.avi	1 week female	99	0.472998	5	0
CS_1 week female_06_C11440_30s-Control5.avi	1 week female	102	0.280149	5	0
CS_1 week female_07_C11440_30s-Control6.avi	1 week female	103	0.10572	5	0
CS_1 week male_03_C11440_30s-Control3.avi	1 week male	106	0.94064	5	1
CS_1 week male_05_C11440_30s-Control5.avi	1 week male	107	0.0424253	5	0
DocumentsWTLDALFP1_5wf_05_C11440_30s5.avi	5wF	116	0.998242	5	1
DocumentsWTLDALFP1_5 week male_05_C11440_30s15.avi	5 week male	121	0.793808	5	1
DocumentsWTLDALFP1_5wf_02_C11440_30s2.avi	5wF	129	0.989657	5	1
DocumentsWTLDALFP1_5wf_03_C11440_30s3.avi	5wF	130	0.987077	5	1
DocumentsWTLDTRFP1_5wf_02_C11440_30s7.avi	5wF	149	0.876249	5	1
DocumentsWTLDTRFP1_5wf_04_C11440_30s9.avi	5wF	151	0.788195	5	1
DocumentsWTLDTRFP1_5 week male_05_C11440_30s20.avi	5 week male	157	0.918696	5	1
DocumentsWTLDTRFP5_5wf_03_C11440_30s86.avi	5wF	160	0.271302	5	0
WTLDALFP1_5wf_03_C11440_30s3.avi	5wF	169	0.987077	5	1
WTLDALFP1_5 week male_03_C11440_30s13.avi	5 week male	174	0.982977	5	1
WTLDALFP5_5wf_03_C11440_30s81.avi	5wF	179	0.907534	5	1
HW1118_1 week female_01_C11440_30s10.avi	1 week female	187	0.0476544	5	0
HW1118_1 week female_02_C11440_30s11.avi	1 week female	188	0.0187876	5	0
HW1118_1 week female_03_C11440_30s12.avi	1 week female	189	0.203507	5	0
HW1118_1 week female_05_C11440_30s14.avi	1 week female	191	0.00840411	5	0
HW1118_1 week female_01_C11440_30s25.avi	1 week female	202	0.032496	5	0
HW1118_1 week female_02_C11440_30s26.avi	1 week female	203	0.228432	5	0
HW1118_1 week male_02_C11440_30s19.avi	1 week male	210	0.0182063	5	0
HW1118_1 week male_06_C11440_30s23.avi	1 week male	214	0.0119207	5	0
DocumentsWTLDALFP5_5 week male_04_C11440_30s92.avi	5 week male	216	0.716761	5	1
DocumentsWTLDALFP5_5 week male_05_C11440_30s93.avi	5 week male	217	0.484256	5	0
DocumentsWTLDTRFP5_5 week male_01_C11440_30s94.avi	5 week male	223	0.865267	5	1
WTLDALFP1_5 week male_01_C11440_30s11.avi	5 week male	227	0.996059	5	1
WTLDALFP1_5 week male_04_C11440_30s14.avi	5 week male	230	0.971093	5	1
