# Supplementary material for: A dual-modality computational pipeline integrating machine learning and deep neural networks for modelling Drosophila cardiac ageing and disease
Source: Research Square preprint supplement (doi:10.21203/rs.3.rs-7558048/v1), 2025-11-07
Supplement: Supplementary file 4 [file b88c3fb026fc2967e8dce867.xlsx]

## Sheet: Raw_data
	Name	Calculation ROI	Logits_Threshold	Mean DD:	STD DD	Mean SD	STD SD	Mean FS	STD FS	Mean EF	STD EF	Mean DI	STD DI	Mean SI	STD SI	Mean HP	STD HP	Mean HR	STD HR	Mean AI
0	Control_3wf_07_C11440_30s	(0, 308)	0.325	90.102	0.939707	61.8083	0.301564	0.313944	0.00787679	0.529265	0.0107155	0.297881	0.0295044	0.208017	0.00748214	0.506121	0.0297843	1.97581	0.116273	0.0578336
1	Control_3wm_26_C11440_30s	(0, 512)	0.45	57.4364	0.0860401	36.5156	0.232702	0.364241	0.0041749	0.595793	0.00532346	0.437308	0.0238813	0.305132	0.0125911	0.743158	0.0314647	1.34561	0.056972	0.0431023
2	LamCG489V_3wf_14_C11440_30	(84, 282)	0.5	42.832	0.59055	26.6259	1.62565	0.378271	0.0386667	0.611958	0.0475146	0.862083	0.41963	0.373478	0.132398	1.25348	0.396965	0.79778	0.25265	0.320133
3	Control_3wf_22_C11440_30s	(150, 373)	0.325	64.3611	0.507874	45.8021	0.212745	0.288318	0.0058659	0.493475	0.00837565	0.292143	0.0331778	0.229273	0.0738452	0.521545	0.0758759	1.91738	0.278946	0.144526
4	Control_3wm_09_C11440_30s	(121, 247)	0.75	51.789	0.270722	41.9848	0.366754	0.189286	0.00830416	0.342674	0.0135148	0.176462	0.0306685	0.282031	0.0205912	0.456328	0.0175054	2.19141	0.0840655	0.0382632
5	LamCG489V_3wf_32_C11440_30	(0, 512)	0.275	62.3079	1.76936	42.8502	1.37296	0.311726	0.0291178	0.525431	0.0388955	0.821905	0.167627	0.53475	0.122316	1.37825	0.210733	0.725558	0.110937	0.157263
6	Control_3wf_12_C11440_30s	(192, 307)	0.3	82.4655	0.443813	52.8745	0.217644	0.358805	0.00498495	0.588844	0.00640938	0.285268	0.0180876	0.245545	0.0135738	0.531182	0.0190445	1.88259	0.0674969	0.0359331
7	LamCG489V_3wf_11_C11440_30	(88, 203)	0.475	48.0294	0.162412	35.7077	0.252104	0.25654	0.00548198	0.447237	0.00815703	0.650667	0.0267623	0.313793	0.00485215	0.965172	0.0281156	1.03608	0.0301813	0.0292871
8	LamCG489V_3wm_08_C11440_30	(72, 340)	0.2	48.9979	2.74294	33.3731	0.87542	0.31666	0.0435731	0.531148	0.0584332	0.378587	0.13159	0.256	0.0912603	0.633556	0.165552	1.57839	0.412443	0.256669
9	Control_3wm_08_C11440_30s	(200, 373)	0.475	50.6834	0.465784	35.1559	0.579253	0.306337	0.0112711	0.518705	0.0155444	0.351778	0.0808645	0.30375	0.0188331	0.652841	0.0891653	1.53177	0.209209	0.131609
10	Control_3wf_31_C11440_30s	(0, 432)	0.5	65.8172	1.01879	43.3452	0.32916	0.341253	0.0125023	0.565896	0.0165393	0.359583	0.0747136	0.249362	0.0882792	0.610745	0.108216	1.63735	0.290115	0.177403
11	Control_3wm_11_C11440_30s	(142, 262)	0.375	48.756	0.488528	36.8896	0.30199	0.24331	0.00949779	0.42733	0.0145093	0.19806	0.0159747	0.243561	0.0164401	0.441364	0.00864035	2.26571	0.0443546	0.0195262
12	LamCG489V_3wm_28_C11440_30	(0, 270)	0.275	58.5435	0.458684	43.4155	0.398116	0.258335	0.0109423	0.449813	0.0163121	0.293019	0.0131873	0.262404	0.00485267	0.554712	0.0117838	1.80274	0.0382959	0.0212322
13	LamCG489V_3wf_03_C11440_30	(113, 262)	0.3	76.9549	1.73643	56.6086	1.72987	0.264081	0.0261385	0.457741	0.0382721	0.127211	0.037203	0.184415	0.0964885	0.311117	0.0965582	3.21422	0.997566	0.321861
14	Control_3wm_35_C11440_30s	(101, 303)	0.2	54.8533	0.899753	37.2483	0.646538	0.320783	0.0155263	0.538424	0.0215104	0.18223	0.0146154	0.22089	0.00544854	0.402945	0.0132891	2.48173	0.0818471	0.0328126
15	Control_3wm_38_C11440_30s	(121, 344)	0.3	59.4291	2.48615	38.269	0.246999	0.35513	0.0225168	0.583636	0.0264361	0.484474	0.0180201	0.291216	0.00833467	0.775811	0.0178777	1.28897	0.029703	0.023068
16	Control_3wm_03_C11440_30s	(150, 357)	0.25	59.9082	0.353021	44.653	0.236971	0.254615	0.00611683	0.444364	0.00916741	0.418444	0.0357588	0.24375	0.00971907	0.661932	0.0410268	1.51073	0.0936357	0.0616945
17	Control_3wf_30_C11440_30s	(0, 221)	0.3	72.7185	1.04805	44.1767	0.416911	0.392319	0.013171	0.63055	0.015972	0.259365	0.0225637	0.20871	0.00553111	0.468629	0.0232998	2.13388	0.106095	0.0495739
18	Control_3wf_20_C11440_30s	(196, 353)	0.475	78.2457	0.483935	58.5011	0.259064	0.252314	0.0054119	0.440936	0.00804587	0.357553	0.013986	0.264022	0.00323358	0.62163	0.0143351	1.60867	0.0370967	0.0231211
19	Control_3wm_28_C11440_30s	(229, 402)	0.3	50.4513	0.42521	34.4418	0.336726	0.31726	0.0100737	0.533765	0.0137557	0.346429	0.0341814	0.257292	0.00467243	0.604375	0.0350539	1.6546	0.0959673	0.0572309
20	Control_3wm_24_C11440_30s	(117, 266)	0.4	76.3086	0.362064	45.7761	0.271463	0.400111	0.00363257	0.64012	0.00436912	0.492162	0.102651	0.298889	0.00906084	0.790833	0.108689	1.26449	0.173786	0.136715
21	LamCG489V_3wf_16_C11440_30	(208, 361)	0.275	49.268	1.92774	39.1968	0.193762	0.20333	0.0279926	0.364534	0.0420845	0.56	0.0340955	0.384032	0.166711	0.945323	0.174559	1.05784	0.195336	0.189738
22	Control_3wf_18_C11440_30s	(120, 234)	0.475	62.8692	1.59426	39.22	1.16412	0.375729	0.0253167	0.609645	0.03221	0.3849	0.0367082	0.213469	0.010361	0.598776	0.0405766	1.67007	0.113174	0.0676277
23	LamCG489V_3wm_03_C11440_30	(109, 303)	0.35	55.9365	0.448841	31.1925	0.450718	0.442328	0.00886457	0.688924	0.00987525	0.299327	0.0180552	0.264216	0.00478689	0.563627	0.0191505	1.77422	0.0602833	0.0338948
24	LamCG489V_3wm_30_C11440_30	(84, 239)	0.6	39.6011	0.791778	26.7857	1.01742	0.323732	0.0179094	0.54234	0.0239647	0.292823	0.0591378	0.186557	0.0570773	0.478852	0.0109167	2.08833	0.047609	0.0227432
25	LamCG489V_3wf_35_C11440_30	(0, 254)	0.25	78.2549	1.39705	46.5143	0.302081	0.405408	0.0116396	0.646325	0.0137101	0.786111	0.0387378	0.318846	0.0205832	1.10519	0.0421189	0.90482	0.0344827	0.0381166
26	LamCG489V_3wf_30_C11440_30	(121, 272)	0.325	89.2317	2.18726	71.1713	1.85504	0.202015	0.0257339	0.362557	0.0412157	0.351429	0.194252	0.253125	0.140711	0.600938	0.20033	1.66407	0.554736	0.307018
27	Control_3wm_17_C11440_30s	(121, 348)	0.325	80.9708	1.69482	55.1694	1.3024	0.31836	0.0211406	0.53492	0.0287197	0.551216	0.0770522	0.247778	0.0124969	0.796944	0.0772916	1.25479	0.121696	0.0939716
28	LamCG489V_3wm_27_C11440_30	(225, 332)	0.45	45.8999	1.74888	29.8946	0.664357	0.347745	0.0288941	0.573728	0.0371868	0.182812	0.0395588	0.188861	0.031502	0.371203	0.0511341	2.69395	0.371098	0.134563
29	LamCG489V_3wf_29_C11440_30	(196, 398)	0.3	61.5064	1.45572	47.5786	1.06303	0.226084	0.0228279	0.400533	0.0353445	0.628793	0.163262	0.377857	0.0888461	1.00071	0.184984	0.999286	0.18472	0.186382
30	Control_3wm_14_C11440_30s	(196, 386)	0.325	80.1835	3.48309	51.0031	1.23699	0.363015	0.0248829	0.593631	0.0315249	0.375227	0.0668696	0.29093	0.0962147	0.667791	0.1245	1.49748	0.279184	0.196064
31	LamCG489V_3wf_07_C11440_30	(208, 357)	0.275	52.2751	0.559359	45.4804	0.0976221	0.129888	0.00879913	0.242828	0.014847	0.285259	0.0115752	0.225614	0.066932	0.510789	0.0687532	1.95775	0.263517	0.136145
32	LamCG489V_3wf_08_C11440_30	(138, 310)	0.175	65.1494	0.198127	46.8969	0.134742	0.280158	0.00311218	0.481817	0.00451111	0.261587	0.00907751	0.211855	0.0588069	0.472823	0.0584864	2.11496	0.261613	0.125777
33	Control_3wf_11_C11440_30s	(239, 356)	0.375	74.815	0.439359	50.0906	0.117994	0.330451	0.00423131	0.551686	0.00568289	0.289364	0.0129001	0.249259	0.00530613	0.538519	0.0142929	1.85695	0.0492855	0.0263463
34	Control_3wm_16_C11440_30s	(249, 376)	0.55	56.4053	1.25138	34.0326	0.612909	0.396359	0.016725	0.635338	0.020084	0.401702	0.0743287	0.220217	0.0102128	0.622065	0.0794312	1.60755	0.205267	0.124111
35	LamCG489V_3wm_35_C11440_30	(174, 322)	0.325	43.0618	0.926545	32.6243	0.508341	0.241995	0.0213715	0.424971	0.0319457	0.265179	0.139671	0.262091	0.0725615	0.528091	0.135185	1.89361	0.484743	0.278732
36	LamCG489V_3wm_37_C11440_30	[0, 512]	0.5	37.3612	0.920222	20.8349	0.713394	0.442061	0.0218921	0.688225	0.0241983	0.161613	0.0275248	0.159239	0.0204426	0.320489	0.0237521	3.12023	0.231247	0.07365
37	Control_3wf_15_C11440_30s	(0, 353)	0.275	74.2688	0.791108	53.0783	0.599822	0.285272	0.00890974	0.489084	0.0127119	0.300472	0.0204724	0.249808	0.0764662	0.550192	0.0755808	1.81755	0.249679	0.141273
38	Control_3wm_04_C11440_30s	(150, 353)	0.275	60.7231	2.25158	39.1451	0.22876	0.3546	0.0205842	0.583035	0.0244582	0.481579	0.0177002	0.294189	0.0092644	0.775946	0.0180404	1.28875	0.0299629	0.023278
39	LamCG489V_3wm_13_C11440_30	(111, 291)	0.45	46.5332	1.48301	34.8886	0.711128	0.249396	0.0308053	0.435645	0.046881	0.397125	0.0682815	0.334103	0.105356	0.732179	0.125911	1.36579	0.234871	0.172481
40	Control_3wm_07_C11440_30s	(0, 221)	0.3	53.3864	0.324377	44.851	0.230126	0.159862	0.00461579	0.294147	0.0077554	0.346	0.0322421	0.304773	0.0272604	0.651591	0.046974	1.53471	0.110639	0.0722677
41	LamCG489V_3wm_34_C11440_30	(126, 287)	0.325	50.8874	1.12787	34.9536	0.587362	0.312931	0.012645	0.527777	0.0174518	0.188176	0.0148318	0.215	0.0051684	0.403014	0.0136928	2.48131	0.0843049	0.0338094
42	Control_3wf_23_C11440_30s	(150, 427)	0.15	75.8318	0.890881	55.7332	0.523267	0.264931	0.0116668	0.459537	0.0169157	0.65	0.179499	0.343103	0.116408	0.991034	0.222886	1.00905	0.226937	0.216394
43	LamCG489V_3wf_04_C11440_30	(56, 220)	0.425	76.6987	0.482884	46.8023	0.25816	0.389766	0.00511779	0.627588	0.00625589	0.280508	0.00847203	0.220603	0.0628975	0.501293	0.0633651	1.99484	0.252155	0.129317
44	Control_3wf_33_C11440_30s	(117, 345)	0.225	78.627	0.736996	55.4873	0.601863	0.294257	0.00841138	0.501856	0.0118319	0.294245	0.0196285	0.256058	0.0767008	0.550577	0.0768969	1.81628	0.253672	0.142402
45	LamCG489V_3wf_19_C11440_30	(101, 328)	0.375	76.015	1.14732	50.3179	0.590798	0.337878	0.0139602	0.5614	0.0186906	0.219179	0.015371	0.217273	0.00754692	0.436591	0.0154763	2.29047	0.0811926	0.0351733
46	Control_3wf_25_C11440_30s	(121, 332)	0.3	80.0548	1.15987	57.7843	0.557138	0.278082	0.00985022	0.478737	0.0143846	0.437674	0.0342757	0.242857	0.102244	0.679762	0.103158	1.4711	0.223249	0.153395
47	LamCG489V_3wm_23_C11440_30	(258, 417)	0.275	44.0955	0.163614	32.7361	0.0645647	0.257601	0.00290077	0.448836	0.00430712	0.221172	0.0102218	0.24	0.00740013	0.46119	0.0131147	2.1683	0.0616592	0.0285102
48	LamCG489V_3wf_24_C11440_30	(295, 410)	0.35	65.2757	2.19013	52.7657	1.09601	0.190715	0.0323789	0.344009	0.0517798	0.444615	0.0673242	0.303553	0.0837046	0.747763	0.0844619	1.33732	0.151054	0.113372
49	Control_3wm_29_C11440_30s	(175, 303)	0.425	70.8248	1.19307	40.8287	0.217617	0.42336	0.0102938	0.667381	0.0118251	1.07548	0.356778	0.36525	0.0249737	1.4815	0.320348	0.674992	0.145955	0.202752
50	Control_3wm_20_C11440_30s	(121, 262)	0.225	66.5843	4.267	42.4633	0.859559	0.360271	0.0332531	0.589641	0.0408029	0.206933	0.0260754	0.187905	0.0134819	0.394932	0.0256864	2.53208	0.164687	0.0642161
51	LamCG489V_3wf_13_C11440_30	(0, 221)	0.35	62.8564	0.999011	45.7592	1.04511	0.271829	0.0200626	0.469365	0.0290164	0.698148	0.0557466	0.377115	0.0272161	1.07692	0.0650898	0.928571	0.0561234	0.0606898
52	Control_3wm_12_C11440_30s	(171, 361)	0.4	55.5666	0.301729	33.5233	0.493277	0.39672	0.00656565	0.63601	0.00804852	0.184667	0.0496544	0.208176	0.00423741	0.393108	0.0510478	2.54383	0.330334	0.135226
53	Control_3wf_38_C11440_30s	(171, 406)	0.225	68.3709	2.25996	52.9322	1.05642	0.225431	0.0133378	0.399864	0.0207214	0.321471	0.017665	0.2626	0.0169482	0.5845	0.0303521	1.71086	0.0888423	0.0514442
54	LamCG489V_3wm_11_C11440_30	(166, 344)	0.25	50.8745	0.821551	34.5448	0.637993	0.320887	0.0127968	0.538641	0.0175748	0.300636	0.116432	0.237963	0.00964742	0.540278	0.119363	1.8509	0.408919	0.241138
55	Control_3wf_34_C11440_30s	(153, 378)	0.325	80.1489	1.4387	54.5736	1.23365	0.318897	0.0188709	0.535742	0.0255389	0.546486	0.0907392	0.252778	0.027448	0.797083	0.0976628	1.25457	0.153717	0.116961
56	LamCG489V_3wm_21_C11440_30	(200, 373)	0.475	36.7433	0.458752	33.2176	0.521255	0.0958129	0.0181671	0.182116	0.0328841	0.28903	0.181976	0.15303	0.0341552	0.444621	0.176533	2.24911	0.892987	0.470754
57	Control_3wf_32_C11440_30s	(0, 512)	0.2	64.2058	1.53272	44.7201	1.3931	0.303095	0.026898	0.5136	0.0364004	0.819524	0.168119	0.53725	0.122398	1.37825	0.211319	0.725558	0.111245	0.157701
58	Control_3wm_02_C11440_30s	(187, 320)	0.075	56.4512	1.1496	38.6534	0.445114	0.315063	0.0127748	0.530698	0.0174144	0.31	0.105223	0.235	0.0211476	0.546481	0.106365	1.82989	0.356163	0.200689
59	Control_3wf_27_C11440_30s	(58, 214)	0.325	90.6556	0.684921	68.4667	0.907239	0.244716	0.011611	0.429412	0.0175943	0.225145	0.0227298	0.206838	0.0486351	0.432426	0.0555619	2.31253	0.297134	0.130734
60	LamCG489V_3wm_36_C11440_30	(142, 327)	0.425	40.4009	0.610375	29.9206	0.442483	0.25914	0.0199027	0.450731	0.0299523	0.246017	0.0202898	0.251466	0.0170448	0.497586	0.0345693	2.0097	0.139622	0.0691386
61	LamCG489V_3wf_18_C11440_30	(81, 241)	0.45	59.3052	1.96216	44.3775	0.847644	0.25124	0.0167903	0.439077	0.0251506	0.196284	0.0111822	0.207192	0.00921532	0.403425	0.0153471	2.47878	0.0942975	0.037894
62	Control_3wf_10_C11440_30s	(0, 512)	0.425	55.7656	0.163773	35.7675	0.441499	0.358617	0.00695598	0.58858	0.00904293	0.595645	0.0332571	0.367	0.168867	0.963167	0.172822	1.03824	0.186293	0.185332
63	Control_3wf_09_C11440_30s	(159, 348)	0.325	55.8221	0.608358	36.5744	0.270062	0.344699	0.0105945	0.570468	0.0142488	0.483158	0.0771228	0.289595	0.0107413	0.772297	0.0826797	1.29484	0.138621	0.105325
64	Control_3wm_05_C11440_30s	(200, 332)	0.475	53.6219	0.628906	31.5351	0.483336	0.411823	0.0112701	0.653921	0.0133015	0.327857	0.0138505	0.269167	0.0835185	0.596667	0.0808054	1.67598	0.226974	0.138129
65	Control_3wm_18_C11440_30s	(200, 332)	0.475	78.6103	0.75725	40.6258	0.753093	0.483141	0.0112887	0.732729	0.0115526	0.224632	0.022998	0.207836	0.0600822	0.432537	0.0696279	2.31194	0.372165	0.165781
66	Control_3wf_05_C11440_30s	(56, 159)	0.375	65.9346	0.306659	47.7694	0.197379	0.275485	0.00489326	0.475054	0.00701593	0.237941	0.0278683	0.198955	0.00461481	0.43709	0.030739	2.28786	0.160897	0.0698614
67	Control_3wm_06_C11440_30s	(179, 311)	0.175	61.573	1.06102	38.6122	0.27007	0.372657	0.0147084	0.606225	0.0191195	0.474079	0.0764324	0.298649	0.0113094	0.772432	0.0825736	1.29461	0.138395	0.105189
68	Control_3wf_24_C11440_30s	(0, 274)	0.525	48.0518	0.400825	39.3267	0.380611	0.181515	0.0109582	0.329962	0.0180976	0.24097	0.0282214	0.196212	0.0221746	0.437121	0.0371632	2.28769	0.194496	0.0844619
69	LamCG489V_3wf_38_C11440_30	(105, 220)	0.425	88.2888	3.0355	56.6271	0.846247	0.357927	0.0223602	0.587243	0.0291097	0.124141	0.0164384	0.176837	0.016512	0.300918	0.00506825	3.32316	0.0559707	0.0168942
70	LamCG489V_3wm_06_C11440_30	(107, 237)	0.3	67.9452	1.81878	45.3563	1.38638	0.332316	0.0167138	0.553919	0.0223351	0.118142	0.00645593	0.145804	0.034509	0.263929	0.0336568	3.7889	0.48317	0.129449
71	Control_3wm_01_C11440_30s	(233, 377)	0.25	52.9497	1.36795	35.5605	0.588872	0.328071	0.0166835	0.548233	0.0220875	0.303545	0.116676	0.235	0.00732828	0.540278	0.120121	1.8509	0.411515	0.246402
72	Control_3wm_40_C11440_30s	(101, 377)	0.3	89.5179	1.06565	63.6062	1.14595	0.289424	0.0118338	0.494942	0.0166859	0.513553	0.240536	0.267973	0.0422262	0.778378	0.268434	1.28472	0.443053	0.305039
73	Control_3wm_33_C11440_30s	(229, 390)	0.6	44.6227	1.12419	33.4995	0.471678	0.248928	0.0164971	0.435619	0.0245882	0.271827	0.0291882	0.29098	0.0164203	0.561863	0.0265308	1.77979	0.0840407	0.0473764
74	Control_3wf_26_C11440_30s	(89, 512)	0.15	66.3208	0.37693	45.545	0.354298	0.31326	0.0041031	0.528371	0.00564832	0.362021	0.0138633	0.266848	0.0877581	0.628478	0.0872831	1.59114	0.220978	0.141924
75	LamCG489V_3wm_10_C11440_30	(138, 307)	0.425	39.8496	0.664204	30.908	0.256036	0.224164	0.014691	0.397863	0.0227311	0.235566	0.0206649	0.318269	0.00579162	0.55375	0.020021	1.80587	0.0652918	0.0357518
76	Control_3wf_01_C11440_30s	(146, 328)	0.3	61.5345	0.275033	43.87	0.142062	0.287052	0.00406414	0.491689	0.0058613	0.263333	0.00890871	0.210081	0.0583544	0.472742	0.0585006	2.11532	0.261765	0.125808
77	Control_3wm_25_C11440_30s	(148, 357)	0.45	48.5697	0.271299	37.6823	0.229824	0.224142	0.0056848	0.398012	0.00889704	0.241417	0.0131368	0.247119	0.00834649	0.488559	0.0142035	2.04683	0.0595058	0.0289866
78	LamCG489V_3wm_09_C11440_30	(96, 241)	0.575	53.2571	0.985166	36.1826	0.264861	0.320338	0.0151425	0.537831	0.0206623	0.110231	0.00453302	0.165187	0.00415389	0.275374	0.00396839	3.63143	0.0523322	0.0144305
79	Control_3wm_36_C11440_30s	(167, 311)	0.375	40.738	0.651573	31.255	0.421476	0.232575	0.0163509	0.410791	0.0248696	0.264649	0.134663	0.253214	0.029617	0.518661	0.122319	1.92804	0.454704	0.249632
80	LamCG489V_3wm_20_C11440_30	(200, 373)	0.325	40.2229	0.190562	34.9735	0.78824	0.130466	0.0209746	0.243471	0.0359685	4.311	2.56581	0.39875	0.354813	4.06375	2.4752	0.246078	0.149884	0.591798
81	Control_3wf_28_C11440_30s	(175, 340)	0.35	60.2649	1.58622	44.4519	0.452085	0.261788	0.0240381	0.454465	0.0359872	0.251905	0.0239614	0.217742	0.0109131	0.469597	0.0282457	2.12949	0.128086	0.0594647
82	LamCG489V_3wf_06_C11440_30	(44, 262)	0.4	69.69	0.581204	52.763	0.178121	0.242835	0.00708135	0.426651	0.0106616	0.288879	0.00965094	0.222807	0.00562088	0.511754	0.0100652	1.95406	0.0384325	0.0195441
83	LamCG489V_3wf_17_C11440_30	(150, 353)	0.35	62.8992	0.495574	46.1417	0.157437	0.266369	0.00683588	0.461738	0.0100398	0.4565	0.0371012	0.263077	0.0340741	0.720641	0.0520007	1.38765	0.100132	0.0722232
84	Control_3wm_37_C11440_30s	(173, 348)	0.5	34.1059	0.637636	27.5307	0.161275	0.192535	0.0143152	0.347795	0.023039	0.244057	0.0309756	0.309519	0.0217561	0.55375	0.0281116	1.80587	0.0916766	0.0501994
85	LamCG489V_3wf_15_C11440_30	(64, 303)	0.425	46.6093	0.141218	40.2505	0.181944	0.13642	0.00437203	0.254211	0.00755182	0.435119	0.0152553	0.265854	0.00847539	0.70061	0.0123068	1.42733	0.0250722	0.0175812
86	Control_3wm_15_C11440_30s	(0, 512)	0.25	63.0321	1.66559	43.585	1.35897	0.308047	0.0278495	0.520425	0.0374223	0.820476	0.167232	0.536	0.122419	1.378	0.210816	0.725689	0.111021	0.157326
87	LamCG489V_3wm_29_C11440_30	(142, 320)	0.425	48.0274	0.582146	32.6239	0.128106	0.320615	0.00925388	0.538351	0.0127953	0.207313	0.0116647	0.237121	0.0860015	0.444318	0.0869469	2.25064	0.440419	0.204581
88	Control_3wm_21_C11440_30s	(156, 320)	0.4	56.3639	0.342055	40.1726	0.652721	0.287219	0.0133895	0.491764	0.018961	0.26161	0.0105942	0.24181	0.0638539	0.503707	0.0658797	1.98528	0.259655	0.13309
89	Control_3wm_34_C11440_30s	(232, 402)	0.525	45.5789	0.808521	33.5953	0.426477	0.262734	0.0137585	0.45625	0.0202758	0.277981	0.0232722	0.292941	0.00852772	0.570588	0.0259835	1.75258	0.0798091	0.0451888
90	Control_3wf_19_C11440_30s	(178, 328)	0.4	71.4676	0.476001	45.2817	0.424085	0.3664	0.00452866	0.598531	0.00573248	0.364479	0.0142609	0.244149	0.00889173	0.60883	0.0144845	1.6425	0.0390762	0.0237451
91	LamCG489V_3wf_12_C11440_30	(116, 269)	0.575	44.0063	0.170323	35.5147	0.176304	0.192948	0.0054523	0.348637	0.00881209	0.738333	0.0567809	0.320962	0.0400245	1.05654	0.0636965	0.946487	0.0570618	0.0606634
92	LamCG489V_3wm_18_C11440_30	(117, 246)	0.4	44.17	1.52003	32.7223	0.67108	0.258016	0.0356356	0.44819	0.0516944	0.186265	0.0476612	0.173232	0.033508	0.359573	0.0568706	2.78108	0.439859	0.162488
93	LamCG489V_3wf_37_C11440_30	(130, 313)	0.725	50.4527	0.470496	35.3695	0.454	0.29892	0.0094857	0.508397	0.0132691	0.21381	0.00966561	0.260323	0.00447853	0.474274	0.00874582	2.10848	0.0388814	0.0184122
94	LamCG489V_3wf_40_C11440_30	(97, 204)	0.5	67.5353	2.27858	44.8827	1.32328	0.334704	0.0289646	0.556542	0.0387396	0.246639	0.0506897	0.243	0.0214515	0.4895	0.0562857	2.0429	0.234905	0.114869
95	LamCG489V_3wm_14_C11440_30	(196, 390)	0.425	51.3196	0.469511	36.0632	0.593045	0.297254	0.0114633	0.506017	0.0160388	0.354778	0.0812196	0.300795	0.0185541	0.653068	0.0889792	1.53123	0.208627	0.131821
96	LamCG489V_3wm_04_C11440_30	(115, 225)	0.175	61.8965	0.702327	50.3059	1.15632	0.1872	0.0189575	0.338996	0.0303867	0.489783	0.741629	0.158444	0.0425418	0.656222	0.756841	1.52387	1.75753	0.2
97	LamCG489V_3wm_15_C11440_30	(101, 320)	0.3	55.5046	0.267912	41.7182	0.370631	0.248372	0.00710828	0.435004	0.0107004	0.184054	0.0242408	0.213904	0.0245681	0.397671	0.0360658	2.51464	0.228059	0.0913058
98	Control_3wm_22_C11440_30s	(167, 324)	0.45	65.552	0.443507	40.0379	0.508588	0.389204	0.00789852	0.626866	0.00976741	0.454872	0.0239253	0.315263	0.120252	0.770526	0.121935	1.29781	0.205378	0.161503
99	LamCG489V_3wf_31_C11440_30	(163, 382)	0.125	77.4494	1.34547	48.4283	1.12311	0.374453	0.0203321	0.608278	0.0253504	0.3487	0.240335	0.233469	0.0156232	0.584592	0.25125	1.7106	0.735191	0.483172
100	LamCG489V_3wm_07_C11440_30	(90, 274)	0.45	44.2674	0.536232	30.2273	0.352488	0.317118	0.00773735	0.533613	0.0106125	0.163734	0.0142195	0.20859	0.0586105	0.372244	0.0584229	2.68641	0.421627	0.160063
101	LamCG489V_3wm_12_C11440_30	(166, 325)	0.2	52.6244	0.820024	36.2089	0.477564	0.311848	0.009486	0.526357	0.0130327	0.309182	0.106232	0.235926	0.0224861	0.546481	0.107111	1.82989	0.358661	0.202097
102	Control_3wm_27_C11440_30s	(262, 401)	0.45	54.3784	1.34764	35.2853	0.680794	0.350961	0.0100506	0.578648	0.0129663	0.498784	0.0583258	0.298333	0.00849837	0.798889	0.0594665	1.25174	0.0931751	0.0738714
103	Control_3wf_04_C11440_30s	(0, 258)	0.35	68.7443	0.996583	43.059	0.322948	0.373466	0.0123006	0.607304	0.015328	0.261349	0.0216979	0.206774	0.00546962	0.468629	0.0233171	2.13388	0.106173	0.0493483
104	LamCG489V_3wm_16_C11440_30	(80, 200)	0.5	51.3029	0.775807	36.4935	0.345429	0.288504	0.0127257	0.493612	0.0180715	0.395	0.0120515	0.308902	0.106448	0.704512	0.106947	1.41942	0.215471	0.154995
105	LamCG489V_3wf_22_C11440_30	(183, 365)	0.325	92.0828	0.7175	77.4287	1.13126	0.159092	0.0137926	0.292684	0.0230666	0.461932	0.303821	0.21093	0.0558679	0.68	0.315707	1.47059	0.682757	0.513345
106	Control_3wf_16_C11440_30s	(105, 324)	0.275	82.856	0.372285	66.8969	0.25005	0.192603	0.00323982	0.3481	0.0052237	0.232279	0.00672101	0.199776	0.00360688	0.432164	0.00618278	2.31394	0.0331044	0.0143786
107	LamCG489V_3wf_25_C11440_30	(83, 229)	0.475	79.1713	1.23561	59.2893	0.634306	0.250941	0.0144568	0.438701	0.0218801	0.473816	0.139276	0.301486	0.0606147	0.770811	0.158581	1.29734	0.266905	0.191062
108	Control_3wf_06_C11440_30s	(0, 303)	0.425	73.1243	0.287976	46.3122	0.141096	0.366659	0.00242469	0.598873	0.00308827	0.190395	0.00449877	0.197333	0.00309121	0.387667	0.00524934	2.57954	0.0349291	0.0136346
109	LamCG489V_3wf_09_C11440_30	(183, 376)	0.35	45.2119	0.36732	38.5967	0.184883	0.146282	0.00495984	0.271141	0.00847126	0.38631	0.0283066	0.311098	0.0130437	0.697317	0.0327611	1.43407	0.0673749	0.0471383
110	Control_3wf_36_C11440_30s	(159, 307)	0.375	73.9814	1.03713	50.0376	1.02693	0.323392	0.0212342	0.54175	0.0290046	0.632273	0.142079	0.265313	0.0498112	0.895938	0.141589	1.11615	0.176391	0.151029
111	Control_3wf_29_C11440_30s	(200, 329)	0.475	71.6681	0.297214	42.2866	0.257156	0.409956	0.00427724	0.65183	0.00503709	1.06881	0.356293	0.372	0.0171318	1.48125	0.318504	0.675105	0.145164	0.199689
112	Control_3wm_13_C11440_30s	(101, 402)	0.325	56.5544	0.325013	38.806	0.189649	0.313802	0.00569064	0.5291	0.00781812	0.320865	0.00663043	0.245784	0.00412697	0.566569	0.00675119	1.76501	0.0210318	0.011949
113	LamCG489V_3wf_27_C11440_30	(126, 357)	0.175	66.8128	1.25633	52.3929	0.733239	0.215568	0.0175847	0.384357	0.0274992	1.18361	0.948586	0.505588	0.2205	1.71029	1.03892	0.584695	0.355174	0.784091
114	LamCG489V_3wm_26_C11440_30	(113, 258)	0.5	43.3439	0.9835	26.9243	0.181369	0.378434	0.0172974	0.613356	0.0213538	0.214797	0.0975041	0.185822	0.00646453	0.401164	0.101443	2.49274	0.630346	0.274171
115	LamCG489V_3wm_05_C11440_30	(101, 249)	0.375	52.6192	0.742464	40.2572	1.25796	0.234889	0.0228151	0.414085	0.0351728	0.14586	0.11199	0.167989	0.0225188	0.314185	0.116794	3.18284	1.18318	0.417123
116	LamCG489V_3wm_25_C11440_30	(171, 410)	0.35	40.8945	0.520633	36.2844	0.500845	0.112641	0.0133721	0.212415	0.0235977	0.600303	0.730902	0.295625	0.0850069	0.908906	0.743796	1.10022	0.900359	1.43729
117	Control_3wf_03_C11440_30s	(77, 238)	0.4	68.0112	1.20872	49.3946	0.9929	0.273609	0.0147629	0.472138	0.0215206	0.259182	0.0248589	0.276204	0.0689198	0.535463	0.0735745	1.86754	0.256607	0.13882
118	LamCG489V_3wf_23_C11440_30	(262, 512)	0.075	77.4715	0.302565	64.0352	0.337251	0.173423	0.00542016	0.316742	0.00896942	0.423605	0.0252965	0.255833	0.0124363	0.679881	0.0300493	1.47085	0.0650083	0.0438676
119	Control_3wm_23_C11440_30s	(254, 361)	0.55	56.3155	1.09421	32.2695	0.521134	0.426826	0.012148	0.671324	0.0138084	0.554848	0.0909003	0.342344	0.177817	0.896094	0.212186	1.11595	0.264247	0.246728
120	LamCG489V_3wm_19_C11440_30	(69, 225)	0.425	37.5582	0.751468	28.6776	0.914767	0.236379	0.0218943	0.416404	0.0332807	0.261	0.103108	0.278148	0.0171674	0.540185	0.103606	1.85122	0.355059	0.199243
121	Control_3wm_10_C11440_30s	(262, 368)	0.475	48.3448	0.499972	35.0659	0.683565	0.274626	0.0144173	0.473625	0.0204874	0.3483	0.0116452	0.236531	0.00858357	0.585	0.0141782	1.7094	0.0414294	0.0240308
122	LamCG489V_3wf_10_C11440_30	(200, 377)	0.5	49.9504	0.460168	34.5187	0.739276	0.308925	0.0141794	0.522214	0.0193743	0.353	0.0817136	0.3025	0.0229005	0.652841	0.0890314	1.53177	0.208895	0.129973
123	LamCG489V_3wf_36_C11440_30	(113, 336)	0.325	69.9771	0.781244	48.0322	0.389372	0.313517	0.00929362	0.528655	0.01274	0.188933	0.0785973	0.204932	0.00649809	0.394662	0.0823035	2.53381	0.528406	0.238561
124	LamCG489V_3wf_34_C11440_30	(150, 361)	0.325	49.924	0.495199	34.4224	0.342048	0.310412	0.0112983	0.524341	0.0158589	0.176286	0.00852248	0.24587	0.00833869	0.421377	0.00966407	2.37317	0.0544276	0.0230097
125	LamCG489V_3wm_02_C11440_30	(114, 282)	0.3	50.9124	1.91442	34.9832	0.458176	0.311788	0.0301172	0.525458	0.0416033	0.375326	0.0815169	0.257889	0.0715114	0.631222	0.11523	1.58423	0.289202	0.177277
126	Control_3wf_35_C11440_30s	(105, 220)	0.275	82.0346	0.272715	63.1264	0.227519	0.230488	0.00212581	0.407847	0.00326718	0.232426	0.00638776	0.199627	0.00359451	0.432239	0.00659509	2.31354	0.0352999	0.0151611
127	LamCG489V_3wf_26_C11440_30	(249, 419)	0.35	74.8225	0.415352	57.9883	0.635266	0.224963	0.00971015	0.399223	0.01503	0.318068	0.194321	0.357326	0.0928887	0.677442	0.184468	1.47614	0.401954	0.28163
128	Control_3wf_17_C11440_30s	(126, 512)	0.4	66.6636	1.74046	45.061	1.03464	0.32324	0.0326631	0.540928	0.0457381	0.627188	0.133504	0.278065	0.0417689	0.904032	0.139974	1.10616	0.171269	0.14812

## Sheet: TopFeatures
Feature	Importance
DD_SD_Diff	0.128052
Mean DD:	0.0734987
HP_AI_Ratio	0.061642
Mean EF	0.0581679
STD HR	0.0555189
Mean FS	0.0545419
Mean HR	0.0508886
Mean DI	0.0506685
STD EF	0.0500561
Mean SD	0.0448452
Mean HP	0.0440399
Mean AI	0.0431917
STD DI	0.0395976
STD SD	0.0379558
Mean SI	0.0373834
STD SI	0.0357917
STD FS	0.0352621
STD HP	0.0340966
STD DD	0.0296551
Logits_Threshold	0.0285473
Gender	0.0065993

## Sheet: Unsupervised_Logits
Name	Gender	TrueTarget	PredClusterRaw	PredClusterMapped	Dist_C0	Dist_C1	Logit_C0	Logit_C1	Prob_C0	Prob_C1	PredMappedProb	PC1	PC2
Control_3wf_07_C11440_30s	0	0	0	0	1.66106	3.79143	-1.37957	-7.18747	0.997005	0.00299471	0.997005	-2.32023	0.308606
Control_3wm_26_C11440_30s	1	0	0	0	1.42818	2.30614	-1.01984	-2.65913	0.837438	0.162562	0.837438	-0.886475	-0.998752
LamCG489V_3wf_14_C11440_30	0	1	1	1	2.45862	1.87314	-3.0224	-1.75432	0.219586	0.780414	0.780414	0.273253	0.309589
Control_3wf_22_C11440_30s	0	0	0	0	1.30297	1.49082	-0.848866	-1.11127	0.565228	0.434772	0.565228	-0.096774	0.655192
Control_3wm_09_C11440_30s	1	0	1	1	3.17312	1.29948	-5.03436	-0.844322	0.0149197	0.98508	0.98508	1.75577	-0.892181
LamCG489V_3wf_32_C11440_30	0	1	0	0	0.958731	1.63207	-0.459583	-1.33183	0.705214	0.294786	0.705214	-0.449484	-0.199637
Control_3wf_12_C11440_30s	0	0	0	0	1.50718	3.80511	-1.1358	-7.23943	0.99777	0.00222975	0.99777	-2.56738	-0.328561
LamCG489V_3wf_11_C11440_30	0	1	1	1	3.56482	2.77783	-6.35397	-3.85816	0.0761526	0.923847	0.923847	0.907725	-2.60384
LamCG489V_3wm_08_C11440_30	1	1	1	1	2.31672	1.33874	-2.68359	-0.896113	0.143383	0.856617	0.856617	0.660681	0.893321
Control_3wm_08_C11440_30s	1	0	1	1	1.98024	0.976567	-1.96067	-0.476841	0.18485	0.81515	0.81515	0.491768	0.15145
Control_3wf_31_C11440_30s	0	0	0	0	0.946669	2.22998	-0.448091	-2.4864	0.884761	0.115239	0.884761	-0.892654	0.818245
Control_3wm_11_C11440_30s	1	0	1	1	2.98685	1.74826	-4.46063	-1.52821	0.0505738	0.949426	0.949426	1.1177	-1.78153
LamCG489V_3wm_28_C11440_30	1	1	1	1	2.5391	2.16526	-3.22351	-2.34417	0.293314	0.706686	0.706686	0.304873	-1.88307
LamCG489V_3wf_03_C11440_30	0	1	0	0	3.60622	3.80271	-6.50239	-7.2303	0.674346	0.325654	0.674346	0.0610832	3.01919
Control_3wm_35_C11440_30s	1	0	1	1	1.51767	1.45409	-1.15167	-1.05719	0.476399	0.523601	0.523601	-0.118737	-0.66588
Control_3wm_38_C11440_30s	1	0	0	0	2.74445	3.42809	-3.76601	-5.87589	0.89186	0.10814	0.89186	-1.06534	-2.30359
Control_3wm_03_C11440_30s	1	0	1	1	1.80707	1.02109	-1.63274	-0.521312	0.247604	0.752396	0.752396	0.433082	-0.536958
Control_3wf_30_C11440_30s	0	0	0	0	1.16786	3.41244	-0.681943	-5.82236	0.994179	0.00582116	0.994179	-2.25961	0.0687132
Control_3wf_20_C11440_30s	0	0	0	0	2.2798	3.0751	-2.59874	-4.72813	0.893727	0.106273	0.893727	-0.807769	-1.63125
Control_3wm_28_C11440_30s	1	0	1	1	1.87907	1.22788	-1.76545	-0.75385	0.266667	0.733333	0.733333	0.242608	-0.578563
Control_3wm_24_C11440_30s	1	0	0	0	1.53535	3.76965	-1.17865	-7.10514	0.997339	0.00266072	0.997339	-2.55025	0.620268
LamCG489V_3wf_16_C11440_30	0	1	1	1	3.13273	0.986391	-4.90699	-0.486483	0.0118851	0.988115	0.988115	1.8495	-0.0684411
Control_3wf_18_C11440_30s	0	0	0	0	0.869536	2.50339	-0.378046	-3.13348	0.940219	0.0597806	0.940219	-1.31029	-0.0814837
LamCG489V_3wm_03_C11440_30	1	1	0	0	1.87815	3.18246	-1.76373	-5.06403	0.964439	0.0355607	0.964439	-1.67689	-0.851425
LamCG489V_3wm_30_C11440_30	1	1	1	1	3.03158	2.03066	-4.59523	-2.06179	0.0735473	0.926453	0.926453	0.780073	-1.69811
LamCG489V_3wf_35_C11440_30	0	1	0	0	2.6771	4.61341	-3.58343	-10.6418	0.999141	0.000859476	0.999141	-3.05843	-1.49178
LamCG489V_3wf_30_C11440_30	0	1	0	0	2.92334	3.24929	-4.27297	-5.27893	0.732229	0.267771	0.732229	-0.0243905	1.77594
Control_3wm_17_C11440_30s	1	0	0	0	0.939775	3.09219	-0.441589	-4.78083	0.987122	0.0128785	0.987122	-1.77361	0.193044
LamCG489V_3wm_27_C11440_30	1	1	1	1	2.37887	1.60665	-2.8295	-1.29066	0.176704	0.823296	0.823296	0.481852	0.743998
LamCG489V_3wf_29_C11440_30	0	1	1	1	2.18205	0.979932	-2.38066	-0.480133	0.130048	0.869952	0.869952	0.843915	0.101866
Control_3wm_14_C11440_30s	1	0	0	0	1.47147	3.59267	-1.08262	-6.45365	0.995372	0.00462781	0.995372	-2.21417	1.09598
LamCG489V_3wf_07_C11440_30	0	1	1	1	4.11443	2.13154	-8.46427	-2.27174	0.00204048	0.99796	0.99796	2.74708	0.14056
LamCG489V_3wf_08_C11440_30	0	1	0	0	1.33488	1.46131	-0.890953	-1.06772	0.544077	0.455923	0.544077	-0.0502043	0.594378
Control_3wf_11_C11440_30s	0	0	0	0	1.28298	3.08336	-0.823017	-4.75354	0.980745	0.0192553	0.980745	-1.68374	-1.00721
Control_3wm_16_C11440_30s	1	0	0	0	1.42534	2.40462	-1.0158	-2.8911	0.86707	0.13293	0.86707	-0.982317	0.3783
LamCG489V_3wm_35_C11440_30	1	1	1	1	3.38063	1.38528	-5.71434	-0.959498	0.00853638	0.991464	0.991464	1.98244	0.92936
LamCG489V_3wm_37_C11440_30	1	1	1	1	2.9778	2.63415	-4.43363	-3.46938	0.276027	0.723973	0.723973	0.029409	0.188759
Control_3wf_15_C11440_30s	0	0	0	0	1.04172	2.20215	-0.54259	-2.42474	0.867858	0.132142	0.867858	-0.710057	0.715521
Control_3wm_04_C11440_30s	1	0	0	0	2.68133	3.4418	-3.59476	-5.923	0.911189	0.088811	0.911189	-1.14693	-2.25738
LamCG489V_3wm_13_C11440_30	1	1	1	1	2.79495	0.667575	-3.90587	-0.222828	0.0245295	0.975471	0.975471	1.4682	0.123266
Control_3wm_07_C11440_30s	1	0	1	1	3.53267	1.64223	-6.23988	-1.34846	0.00745479	0.992545	0.992545	2.11385	-0.620399
LamCG489V_3wm_34_C11440_30	1	1	1	1	1.88429	1.24033	-1.77528	-0.769208	0.267749	0.732251	0.732251	0.245298	-0.713524
Control_3wf_23_C11440_30s	0	0	0	0	1.2461	2.14625	-0.776388	-2.3032	0.82154	0.17846	0.82154	-0.530508	0.585967
LamCG489V_3wf_04_C11440_30	0	1	0	0	1.51557	3.66434	-1.14848	-6.71368	0.996186	0.0038142	0.996186	-2.35983	0.971252
Control_3wf_33_C11440_30s	0	0	0	0	1.06649	2.63617	-0.568705	-3.4747	0.948142	0.0518581	0.948142	-1.11817	0.821407
LamCG489V_3wf_19_C11440_30	0	1	0	0	0.750932	2.99238	-0.281949	-4.47717	0.985156	0.0148438	0.985156	-1.78531	-0.269124
Control_3wf_25_C11440_30s	0	0	0	0	1.1865	2.59376	-0.703894	-3.36381	0.934619	0.0653807	0.934619	-0.993714	0.684852
LamCG489V_3wm_23_C11440_30	1	1	1	1	2.92106	1.2786	-4.26631	-0.817405	0.0308017	0.969198	0.969198	1.28606	-1.29793
LamCG489V_3wf_24_C11440_30	0	1	1	1	2.60705	1.44559	-3.39836	-1.04486	0.0867876	0.913212	0.913212	1.10144	-0.0903576
Control_3wm_29_C11440_30s	1	0	0	0	1.54345	3.67844	-1.19112	-6.76547	0.99622	0.00377959	0.99622	-2.47564	0.363295
Control_3wm_20_C11440_30s	1	0	0	0	0.68895	2.51966	-0.237326	-3.17434	0.949646	0.0503541	0.949646	-1.3251	0.312561
LamCG489V_3wf_13_C11440_30	0	1	0	0	1.64848	1.67344	-1.35875	-1.40021	0.510364	0.489636	0.510364	-0.0631452	-1.09816
Control_3wm_12_C11440_30s	1	0	0	0	1.67576	2.42495	-1.40409	-2.94019	0.822897	0.177103	0.822897	-0.806919	0.870692
Control_3wf_38_C11440_30s	0	0	1	1	1.91107	1.54193	-1.8261	-1.18878	0.345852	0.654148	0.654148	0.333731	-0.514024
LamCG489V_3wm_11_C11440_30	1	1	1	1	2.17326	1.41699	-2.36153	-1.00393	0.20463	0.79537	0.79537	0.485863	0.939031
Control_3wf_34_C11440_30s	0	0	0	0	0.906527	3.01799	-0.410895	-4.55414	0.984377	0.0156233	0.984377	-1.68801	0.395696
LamCG489V_3wm_21_C11440_30	1	1	1	1	6.00223	4.02929	-18.0134	-8.11758	5.03829e-05	0.99995	0.99995	4.44803	1.83733
Control_3wf_32_C11440_30s	0	0	0	0	0.914417	1.65583	-0.418079	-1.37088	0.721679	0.278321	0.721679	-0.458799	-0.178915
Control_3wm_02_C11440_30s	1	0	1	1	1.70988	1.4194	-1.46185	-1.00735	0.388291	0.611709	0.611709	0.137806	0.845309
Control_3wf_27_C11440_30s	0	0	0	0	2.04949	3.22924	-2.10019	-5.21399	0.957458	0.0425418	0.957458	-1.04033	1.07835
LamCG489V_3wm_36_C11440_30	1	1	1	1	3.09998	1.03851	-4.80493	-0.539254	0.0138479	0.986152	0.986152	1.62441	-0.454322
LamCG489V_3wf_18_C11440_30	0	1	1	1	1.88598	0.973959	-1.77847	-0.474298	0.213464	0.786536	0.786536	0.514616	-0.544048
Control_3wf_10_C11440_30s	0	0	0	0	1.3602	1.86297	-0.925069	-1.73533	0.692164	0.307836	0.692164	-0.504208	0.240807
Control_3wf_09_C11440_30s	0	0	0	0	1.31175	1.68141	-0.860339	-1.41356	0.634883	0.365117	0.634883	-0.394684	-0.0753466
Control_3wm_05_C11440_30s	1	0	0	0	1.70374	2.49902	-1.45137	-3.12255	0.841733	0.158267	0.841733	-0.926937	0.460881
Control_3wm_18_C11440_30s	1	0	0	0	3.0784	5.15829	-4.73828	-13.304	0.99981	0.000190496	0.99981	-3.65851	1.61824
Control_3wf_05_C11440_30s	0	0	0	0	1.2134	1.46036	-0.736174	-1.06633	0.581797	0.418203	0.581797	-0.134822	0.128737
Control_3wm_06_C11440_30s	1	0	0	0	0.928678	2.36699	-0.431221	-2.80131	0.914518	0.085482	0.914518	-1.14715	0.0744876
Control_3wf_24_C11440_30s	0	0	1	1	3.48663	1.32728	-6.07828	-0.880843	0.00550031	0.9945	0.9945	2.198	-0.138586
LamCG489V_3wf_38_C11440_30	0	1	0	0	2.07918	4.33567	-2.16151	-9.39903	0.999281	0.00071857	0.999281	-3.00247	-0.485562
LamCG489V_3wm_06_C11440_30	1	1	0	0	1.50942	2.47138	-1.13917	-3.05386	0.871545	0.128455	0.871545	-0.752844	1.48395
Control_3wm_01_C11440_30s	1	0	1	1	2.00468	1.55151	-2.00937	-1.20359	0.30879	0.69121	0.69121	0.261594	0.997866
Control_3wm_40_C11440_30s	1	0	0	0	2.01839	3.57469	-2.03695	-6.38919	0.987286	0.0127141	0.987286	-1.57938	1.62434
Control_3wm_33_C11440_30s	1	0	1	1	2.88658	0.979528	-4.16618	-0.479737	0.0244482	0.975552	0.975552	1.40831	-0.90945
Control_3wf_26_C11440_30s	0	0	0	0	0.862478	1.88941	-0.371934	-1.78493	0.804238	0.195762	0.804238	-0.615116	0.510019
LamCG489V_3wm_10_C11440_30	1	1	1	1	3.50714	1.53813	-6.15001	-1.18292	0.00691523	0.993085	0.993085	1.9402	-1.35025
Control_3wf_01_C11440_30s	0	0	1	1	1.44522	1.27601	-1.04433	-0.814105	0.442697	0.557303	0.557303	0.0855665	0.54556
Control_3wm_25_C11440_30s	1	0	1	1	2.98414	1.31004	-4.45256	-0.858098	0.0267408	0.973259	0.973259	1.42506	-1.33235
LamCG489V_3wm_09_C11440_30	1	1	1	1	1.91432	1.79084	-1.8323	-1.60355	0.44306	0.55694	0.55694	-0.082188	-1.2964
Control_3wm_36_C11440_30s	1	0	1	1	3.56767	1.44743	-6.36414	-1.04753	0.00488538	0.995115	0.995115	2.20477	0.781343
LamCG489V_3wm_20_C11440_30	1	1	1	1	4.55554	2.36761	-10.3765	-2.80279	0.000513532	0.999486	0.999486	3.20436	-0.582005
Control_3wf_28_C11440_30s	0	0	1	1	1.68307	0.981324	-1.41636	-0.481498	0.28194	0.71806	0.71806	0.363241	-0.20626
LamCG489V_3wf_06_C11440_30	0	1	0	0	2.35946	2.54031	-2.78352	-3.22659	0.608989	0.391011	0.608989	-0.148731	-1.73245
LamCG489V_3wf_17_C11440_30	0	1	1	1	1.46915	1.24573	-1.0792	-0.775919	0.424757	0.575243	0.575243	0.10192	-0.391499
Control_3wm_37_C11440_30s	1	0	1	1	4.1443	1.93842	-8.58759	-1.87874	0.00121857	0.998781	0.998781	2.68378	-1.06741
LamCG489V_3wf_15_C11440_30	0	1	1	1	5.27509	4.02421	-13.9133	-8.09714	0.00297027	0.99703	0.99703	2.46599	-3.34907
Control_3wm_15_C11440_30s	1	0	0	0	0.941579	1.63492	-0.443285	-1.33649	0.70955	0.29045	0.70955	-0.4485	-0.19274
LamCG489V_3wm_29_C11440_30	1	1	1	1	2.43331	1.45261	-2.9605	-1.05503	0.129491	0.870509	0.870509	0.705381	0.98095
Control_3wm_21_C11440_30s	1	0	1	1	1.77155	0.970877	-1.56919	-0.471301	0.250135	0.749865	0.749865	0.411445	0.449577
Control_3wm_34_C11440_30s	1	0	1	1	2.69791	0.974634	-3.63937	-0.474956	0.0405272	0.959473	0.959473	1.17608	-0.94439
Control_3wf_19_C11440_30s	0	0	0	0	1.86161	3.53368	-1.7328	-6.24345	0.989128	0.0108718	0.989128	-1.9959	-1.4258
LamCG489V_3wf_12_C11440_30	0	1	1	1	3.63175	1.73275	-6.59481	-1.50122	0.00609852	0.993901	0.993901	2.0657	-1.49964
LamCG489V_3wm_18_C11440_30	1	1	1	1	3.1006	1.1739	-4.80687	-0.689019	0.0160187	0.983981	0.983981	1.68766	0.821434
LamCG489V_3wf_37_C11440_30	0	1	1	1	2.63495	2.16097	-3.47147	-2.33489	0.242949	0.757051	0.757051	0.301395	-1.92559
LamCG489V_3wf_40_C11440_30	0	1	0	0	0.745037	2.24439	-0.27754	-2.51865	0.903881	0.0961187	0.903881	-0.974413	0.62216
LamCG489V_3wm_14_C11440_30	1	1	1	1	1.99468	0.873015	-1.98938	-0.381077	0.166824	0.833176	0.833176	0.559922	0.147645
LamCG489V_3wm_04_C11440_30	1	1	1	1	6.99619	6.26138	-24.4734	-19.6024	0.00760792	0.992392	0.992392	2.65258	4.56558
LamCG489V_3wm_15_C11440_30	1	1	1	1	2.21967	0.626007	-2.46347	-0.195943	0.0938486	0.906151	0.906151	0.937273	0.240597
Control_3wm_22_C11440_30s	1	0	0	0	1.06598	2.83803	-0.568156	-4.02721	0.9695	0.0305	0.9695	-1.57215	0.559821
LamCG489V_3wf_31_C11440_30	0	1	0	0	2.67953	4.05628	-3.58995	-8.22671	0.990404	0.00959602	0.990404	-1.79314	2.50101
LamCG489V_3wm_07_C11440_30	1	1	1	1	2.69307	1.41085	-3.6263	-0.995253	0.0671668	0.932833	0.932833	0.980776	0.845571
LamCG489V_3wm_12_C11440_30	1	1	1	1	1.99799	1.24968	-1.99597	-0.780851	0.228796	0.771204	0.771204	0.433853	0.781267
Control_3wm_27_C11440_30s	1	0	0	0	1.41887	1.77426	-1.0066	-1.574	0.638163	0.361837	0.638163	-0.432726	-0.484127
Control_3wf_04_C11440_30s	0	0	0	0	0.757837	2.86953	-0.287158	-4.1171	0.978751	0.0212494	0.978751	-1.71824	-0.0439018
LamCG489V_3wm_16_C11440_30	1	1	1	1	2.07956	0.785883	-2.16229	-0.308806	0.135465	0.864535	0.864535	0.676075	0.184403
LamCG489V_3wf_22_C11440_30	0	1	1	1	3.8581	3.76149	-7.44247	-7.0744	0.409008	0.590992	0.590992	0.675533	2.12106
Control_3wf_16_C11440_30s	0	0	0	0	3.24077	3.48989	-5.25131	-6.08966	0.698119	0.301881	0.698119	-0.151064	-1.93894
LamCG489V_3wf_25_C11440_30	0	1	0	0	1.53025	2.33259	-1.17084	-2.72049	0.824863	0.175137	0.824863	-0.484649	0.765231
Control_3wf_06_C11440_30s	0	0	0	0	2.16603	3.8032	-2.34584	-7.23218	0.992508	0.00749245	0.992508	-2.14275	-1.61934
LamCG489V_3wf_09_C11440_30	0	1	1	1	4.13399	2.14813	-8.54492	-2.30723	0.00195056	0.998049	0.998049	2.62828	-1.32214
Control_3wf_36_C11440_30s	0	0	0	0	0.585905	2.57757	-0.171642	-3.32192	0.95892	0.0410802	0.95892	-1.31439	0.425737
Control_3wf_29_C11440_30s	0	0	0	0	1.38109	3.55415	-0.953698	-6.316	0.995332	0.00466823	0.995332	-2.36697	0.344713
Control_3wm_13_C11440_30s	1	0	0	0	4.2666	4.43525	-9.10195	-9.83571	0.675629	0.324371	0.675629	-0.461167	-3.5001
LamCG489V_3wf_27_C11440_30	0	1	1	1	2.36009	1.49741	-2.78501	-1.12111	0.15924	0.84076	0.84076	0.851605	0.883512
LamCG489V_3wm_26_C11440_30	1	1	1	1	3.06477	2.47579	-4.69642	-3.06477	0.163604	0.836396	0.836396	0.549061	1.55639
LamCG489V_3wm_05_C11440_30	1	1	1	1	4.85033	3.87181	-11.7629	-7.49547	0.0138244	0.986176	0.986176	2.08037	3.0996
LamCG489V_3wm_25_C11440_30	1	1	1	1	5.66403	3.76838	-16.0406	-7.10033	0.000130983	0.999869	0.999869	4.05095	1.96211
Control_3wf_03_C11440_30s	0	0	0	0	1.29618	1.61482	-0.840038	-1.30382	0.613912	0.386088	0.613912	-0.142825	0.60941
LamCG489V_3wf_23_C11440_30	0	1	1	1	2.80091	2.45242	-3.92254	-3.00717	0.285902	0.714098	0.714098	0.582996	-0.860802
Control_3wm_23_C11440_30s	1	0	0	0	1.71709	2.82846	-1.47421	-4.00009	0.925937	0.0740633	0.925937	-1.26945	0.692241
LamCG489V_3wm_19_C11440_30	1	1	1	1	3.63465	1.4191	-6.60535	-1.00692	0.00369	0.99631	0.99631	2.26313	0.41
Control_3wm_10_C11440_30s	1	0	1	1	2.83585	1.93529	-4.02103	-1.87267	0.104485	0.895515	0.895515	0.742892	-1.88265
LamCG489V_3wf_10_C11440_30	0	1	1	1	2.02061	0.996873	-2.04143	-0.496878	0.175875	0.824125	0.824125	0.50865	0.136821
LamCG489V_3wf_36_C11440_30	0	1	0	0	1.69327	2.48654	-1.43359	-3.09145	0.839951	0.160049	0.839951	-0.593294	1.64053
LamCG489V_3wf_34_C11440_30	0	1	1	1	2.17369	1.59643	-2.36246	-1.2743	0.251965	0.748035	0.748035	0.266966	-1.30563
LamCG489V_3wm_02_C11440_30	1	1	1	1	2.0114	1.1014	-2.02287	-0.606545	0.195239	0.804761	0.804761	0.484553	0.493449
Control_3wf_35_C11440_30s	0	0	0	0	2.66754	3.33899	-3.55789	-5.57442	0.882522	0.117478	0.882522	-0.704043	-1.74501
LamCG489V_3wf_26_C11440_30	0	1	1	1	2.13518	2.04533	-2.2795	-2.0917	0.453187	0.546813	0.546813	0.291424	1.14097
Control_3wf_17_C11440_30s	0	0	0	0	0.635687	2.02902	-0.202049	-2.05846	0.864878	0.135122	0.864878	-0.825571	0.268574

## Sheet: Supervised_logits
Name	Fold	True_Label	Predicted_Label	Prob_1	Logit_1
Control_3wf_22_C11440_30s	1	0	0	0.354105	-0.601045
Control_3wm_09_C11440_30s	1	0	0	0.447501	-0.210773
Control_3wm_11_C11440_30s	1	0	1	0.509809	0.0392414
LamCG489V_3wf_03_C11440_30	1	1	1	0.854755	1.7724
Control_3wm_38_C11440_30s	1	0	0	0.171732	-1.5734
Control_3wm_28_C11440_30s	1	0	1	0.59701	0.393021
LamCG489V_3wf_16_C11440_30	1	1	1	0.532675	0.130888
Control_3wm_14_C11440_30s	1	0	0	0.278395	-0.952437
LamCG489V_3wf_07_C11440_30	1	1	1	0.777684	1.25222
LamCG489V_3wm_23_C11440_30	1	1	1	0.631755	0.539752
Control_3wm_29_C11440_30s	1	0	0	0.164812	-1.62285
Control_3wm_12_C11440_30s	1	0	0	0.331104	-0.703197
LamCG489V_3wm_11_C11440_30	1	1	1	0.974615	3.6479
Control_3wf_32_C11440_30s	1	0	0	0.191354	-1.44124
Control_3wf_27_C11440_30s	1	0	0	0.465592	-0.137849
LamCG489V_3wf_38_C11440_30	1	1	0	0.325937	-0.726617
Control_3wm_01_C11440_30s	1	0	1	0.751561	1.10696
LamCG489V_3wm_09_C11440_30	1	1	1	0.616439	0.474461
LamCG489V_3wf_17_C11440_30	1	1	0	0.420202	-0.321945
Control_3wm_37_C11440_30s	1	0	1	0.585083	0.343677
LamCG489V_3wf_15_C11440_30	1	1	1	0.625724	0.513917
Control_3wm_21_C11440_30s	1	0	1	0.663055	0.676938
LamCG489V_3wf_12_C11440_30	1	1	1	0.648678	0.613232
Control_3wf_06_C11440_30s	1	0	0	0.258522	-1.05366
LamCG489V_3wf_27_C11440_30	1	1	1	0.887079	2.06124
LamCG489V_3wf_10_C11440_30	1	1	1	0.631436	0.538382
Control_3wm_26_C11440_30s	2	0	0	0.342898	-0.650408
LamCG489V_3wf_11_C11440_30	2	1	1	0.610228	0.448273
Control_3wm_03_C11440_30s	2	0	0	0.427503	-0.292048
LamCG489V_3wm_30_C11440_30	2	1	1	0.63127	0.537669
Control_3wm_04_C11440_30s	2	0	0	0.204675	-1.35733
LamCG489V_3wm_13_C11440_30	2	1	1	0.636318	0.559417
Control_3wf_38_C11440_30s	2	0	1	0.600777	0.408703
LamCG489V_3wm_36_C11440_30	2	1	1	0.579706	0.321568
LamCG489V_3wf_18_C11440_30	2	1	1	0.559075	0.237411
Control_3wm_05_C11440_30s	2	0	0	0.309907	-0.800552
Control_3wm_18_C11440_30s	2	0	1	0.587966	0.355564
Control_3wf_05_C11440_30s	2	0	0	0.263096	-1.02994
Control_3wm_06_C11440_30s	2	0	0	0.0686854	-2.60706
Control_3wm_15_C11440_30s	2	0	0	0.269493	-0.997195
LamCG489V_3wm_15_C11440_30	2	1	1	0.537631	0.150808
LamCG489V_3wm_12_C11440_30	2	1	1	0.724343	0.966109
Control_3wf_04_C11440_30s	2	0	0	0.182035	-1.50262
LamCG489V_3wm_16_C11440_30	2	1	1	0.696254	0.829522
LamCG489V_3wf_25_C11440_30	2	1	0	0.192848	-1.43161
Control_3wf_36_C11440_30s	2	0	0	0.0809434	-2.4296
Control_3wf_29_C11440_30s	2	0	0	0.279942	-0.944751
LamCG489V_3wm_26_C11440_30	2	1	1	0.942622	2.799
LamCG489V_3wf_23_C11440_30	2	1	1	0.626883	0.518869
Control_3wm_23_C11440_30s	2	0	0	0.293871	-0.876659
Control_3wf_35_C11440_30s	2	0	0	0.32184	-0.745329
LamCG489V_3wf_26_C11440_30	2	1	1	0.779868	1.2649
Control_3wf_07_C11440_30s	3	0	0	0.293464	-0.878619
LamCG489V_3wm_08_C11440_30	3	1	1	0.874985	1.94577
Control_3wm_08_C11440_30s	3	0	1	0.728148	0.985245
Control_3wf_20_C11440_30s	3	0	0	0.482271	-0.0709439
Control_3wf_18_C11440_30s	3	0	0	0.189221	-1.45508
LamCG489V_3wm_03_C11440_30	3	1	0	0.116043	-2.03045
LamCG489V_3wf_08_C11440_30	3	1	0	0.233386	-1.18929
Control_3wm_16_C11440_30s	3	0	0	0.0394024	-3.19373
LamCG489V_3wm_37_C11440_30	3	1	1	0.744301	1.06844
LamCG489V_3wm_34_C11440_30	3	1	0	0.332294	-0.697827
Control_3wf_33_C11440_30s	3	0	0	0.358464	-0.582037
LamCG489V_3wf_24_C11440_30	3	1	1	0.665623	0.688456
LamCG489V_3wf_13_C11440_30	3	1	1	0.641221	0.580666
Control_3wf_34_C11440_30s	3	0	0	0.19284	-1.43166
Control_3wm_40_C11440_30s	3	0	0	0.490537	-0.0378576
Control_3wf_01_C11440_30s	3	0	0	0.290022	-0.895277
Control_3wm_25_C11440_30s	3	0	1	0.573365	0.295595
Control_3wf_19_C11440_30s	3	0	0	0.239423	-1.15584
LamCG489V_3wf_37_C11440_30	3	1	1	0.68632	0.782973
LamCG489V_3wm_14_C11440_30	3	1	1	0.758627	1.14517
Control_3wm_22_C11440_30s	3	0	0	0.0631054	-2.69777
LamCG489V_3wm_25_C11440_30	3	1	1	0.815013	1.48292
Control_3wf_03_C11440_30s	3	0	0	0.275457	-0.967111
LamCG489V_3wm_19_C11440_30	3	1	1	0.763737	1.17328
LamCG489V_3wf_36_C11440_30	3	1	1	0.810522	1.4534
LamCG489V_3wm_02_C11440_30	3	1	1	0.69642	0.83031
LamCG489V_3wf_32_C11440_30	4	1	0	0.0443031	-3.07139
Control_3wf_12_C11440_30s	4	0	0	0.475703	-0.0972657
LamCG489V_3wf_35_C11440_30	4	1	0	0.308421	-0.807512
LamCG489V_3wf_30_C11440_30	4	1	1	0.838635	1.64811
Control_3wm_17_C11440_30s	4	0	0	0.0913194	-2.29763
LamCG489V_3wm_27_C11440_30	4	1	1	0.845903	1.70282
LamCG489V_3wf_29_C11440_30	4	1	1	0.747159	1.08352
Control_3wf_11_C11440_30s	4	0	0	0.399061	-0.40938
LamCG489V_3wm_35_C11440_30	4	1	1	0.974663	3.64983
Control_3wm_07_C11440_30s	4	0	1	0.541665	0.167046
Control_3wf_23_C11440_30s	4	0	0	0.310564	-0.797484
Control_3wf_25_C11440_30s	4	0	0	0.198031	-1.39864
Control_3wm_20_C11440_30s	4	0	0	0.0249001	-3.66767
Control_3wm_02_C11440_30s	4	0	0	0.270664	-0.991254
Control_3wf_24_C11440_30s	4	0	1	0.854773	1.77254
Control_3wf_26_C11440_30s	4	0	0	0.102668	-2.16793
Control_3wm_36_C11440_30s	4	0	1	0.972784	3.57637
LamCG489V_3wm_20_C11440_30	4	1	1	0.78738	1.30921
LamCG489V_3wm_29_C11440_30	4	1	1	0.94314	2.80862
LamCG489V_3wf_40_C11440_30	4	1	0	0.12501	-1.94581
LamCG489V_3wm_07_C11440_30	4	1	1	0.960202	3.18332
Control_3wm_27_C11440_30s	4	0	0	0.123858	-1.9564
LamCG489V_3wf_22_C11440_30	4	1	1	0.913798	2.36091
LamCG489V_3wm_05_C11440_30	4	1	1	0.953569	3.02224
LamCG489V_3wf_34_C11440_30	4	1	1	0.789339	1.32094
Control_3wf_17_C11440_30s	4	0	0	0.0520701	-2.90169
LamCG489V_3wf_14_C11440_30	5	1	1	0.78073	1.26993
Control_3wf_31_C11440_30s	5	0	0	0.337074	-0.676359
LamCG489V_3wm_28_C11440_30	5	1	1	0.583846	0.338584
Control_3wm_35_C11440_30s	5	0	0	0.281066	-0.93918
Control_3wf_30_C11440_30s	5	0	0	0.10638	-2.12826
Control_3wm_24_C11440_30s	5	0	0	0.0757043	-2.5022
Control_3wf_15_C11440_30s	5	0	0	0.247375	-1.11266
LamCG489V_3wf_04_C11440_30	5	1	0	0.213847	-1.30189
LamCG489V_3wf_19_C11440_30	5	1	0	0.182248	-1.50119
LamCG489V_3wm_21_C11440_30	5	1	1	0.782022	1.27749
Control_3wf_10_C11440_30s	5	0	0	0.163538	-1.63213
Control_3wf_09_C11440_30s	5	0	0	0.214644	-1.29716
LamCG489V_3wm_06_C11440_30	5	1	1	0.541008	0.1644
Control_3wm_33_C11440_30s	5	0	1	0.652788	0.631318
LamCG489V_3wm_10_C11440_30	5	1	1	0.526302	0.105306
Control_3wf_28_C11440_30s	5	0	1	0.647995	0.610238
LamCG489V_3wf_06_C11440_30	5	1	1	0.596177	0.389561
Control_3wm_34_C11440_30s	5	0	1	0.778971	1.25968
LamCG489V_3wm_18_C11440_30	5	1	1	0.935274	2.67068
LamCG489V_3wm_04_C11440_30	5	1	1	0.702748	0.860419
LamCG489V_3wf_31_C11440_30	5	1	1	0.591414	0.369815
Control_3wf_16_C11440_30s	5	0	1	0.611867	0.455166
LamCG489V_3wf_09_C11440_30	5	1	1	0.701274	0.853373
Control_3wm_13_C11440_30s	5	0	0	0.307684	-0.81097
Control_3wm_10_C11440_30s	5	0	1	0.80101	1.39262

## Sheet: Video_classification_logits
SampleID	Raw Preds	Labels	Fold
Control_3wf_10_C11440_30s.avi	0.70839	0	1
Control_3wf_13_C11440_30s.avi	0.13019	0	1
Control_3wf_16_C11440_30s.avi	0.535347	0	1
Control_3wf_19_C11440_30s.avi	0.235227	0	1
Control_3wf_20_C11440_30s.avi	0.32642	0	1
Control_3wf_25_C11440_30s.avi	0.415422	0	1
Control_3wf_30_C11440_30s.avi	0.324256	0	1
Control_3wf_31_C11440_30s.avi	0.479815	0	1
Control_3wf_32_C11440_30s.avi	0.558837	0	1
Control_3wm_08_C11440_30s.avi	0.400589	0	1
Control_3wm_14_C11440_30s.avi	0.653456	0	1
Control_3wm_18_C11440_30s.avi	0.301319	0	1
Control_3wm_31_C11440_30s.avi	0.221268	0	1
Control_3wm_32_C11440_30s.avi	0.882438	0	1
Control_3wm_39_C11440_30s.avi	0.818949	0	1
Control_3wm_41_C11440_30s.avi	0.362095	0	1
LamCG489V_3wf_04_C11440_30.avi	0.210994	1	1
LamCG489V_3wf_12_C11440_30.avi	0.753559	1	1
LamCG489V_3wf_15_C11440_30.avi	0.638707	1	1
LamCG489V_3wf_16_C11440_30.avi	0.886595	1	1
LamCG489V_3wf_18_C11440_30.avi	0.507508	1	1
LamCG489V_3wf_19_C11440_30.avi	0.835995	1	1
LamCG489V_3wf_20_C11440_30.avi	0.324738	1	1
LamCG489V_3wf_23_C11440_30.avi	0.56071	1	1
LamCG489V_3wf_26_C11440_30.avi	0.479815	1	1
LamCG489V_3wf_36_C11440_30.avi	0.795007	1	1
LamCG489V_3wm_01_C11440_30.avi	0.582252	1	1
LamCG489V_3wm_07_C11440_30.avi	0.913488	1	1
LamCG489V_3wm_14_C11440_30.avi	0.629402	1	1
LamCG489V_3wm_21_C11440_30.avi	0.800986	1	1
LamCG489V_3wm_30_C11440_30.avi	0.797212	1	1
LamCG489V_3wm_35_C11440_30.avi	0.511114	1	1
Control_3wf_05_C11440_30s.avi	0.894718	0	2
Control_3wf_12_C11440_30s.avi	0.73083	0	2
Control_3wf_17_C11440_30s.avi	0.198663	0	2
Control_3wf_23_C11440_30s.avi	0.804189	0	2
Control_3wf_27_C11440_30s.avi	0.613359	0	2
Control_3wf_28_C11440_30s.avi	0.145743	0	2
Control_3wf_33_C11440_30s.avi	0.131438	0	2
Control_3wf_37_C11440_30s.avi	0.574285	0	2
Control_3wm_04_C11440_30s.avi	0.42367	0	2
Control_3wm_05_C11440_30s.avi	0.268622	0	2
Control_3wm_19_C11440_30s.avi	0.733014	0	2
Control_3wm_23_C11440_30s.avi	0.768422	0	2
Control_3wm_28_C11440_30s.avi	0.137501	0	2
Control_3wm_29_C11440_30s.avi	0.130647	0	2
Control_3wm_30_C11440_30s.avi	0.915465	0	2
Control_3wm_38_C11440_30s.avi	0.720212	0	2
LamCG489V_3wf_01_C11440_30.avi	0.930364	1	2
LamCG489V_3wf_07_C11440_30.avi	0.675562	1	2
LamCG489V_3wf_08_C11440_30.avi	0.937882	1	2
LamCG489V_3wf_39_C11440_30.avi	0.830344	1	2
LamCG489V_3wf_40_C11440_30.avi	0.769835	1	2
LamCG489V_3wm_04_C11440_30.avi	0.804259	1	2
LamCG489V_3wm_05_C11440_30.avi	0.703569	1	2
LamCG489V_3wm_06_C11440_30.avi	0.70204	1	2
LamCG489V_3wm_09_C11440_30.avi	0.331536	1	2
LamCG489V_3wm_10_C11440_30.avi	0.899515	1	2
LamCG489V_3wm_13_C11440_30.avi	0.838579	1	2
LamCG489V_3wm_16_C11440_30.avi	0.909776	1	2
LamCG489V_3wm_17_C11440_30.avi	0.793248	1	2
LamCG489V_3wm_20_C11440_30.avi	0.875093	1	2
LamCG489V_3wm_31_C11440_30.avi	0.797593	1	2
Control_3wf_01_C11440_30s.avi	0.127374	0	3
Control_3wf_06_C11440_30s.avi	0.397761	0	3
Control_3wf_11_C11440_30s.avi	0.142483	0	3
Control_3wf_24_C11440_30s.avi	0.0596965	0	3
Control_3wf_26_C11440_30s.avi	0.397329	0	3
Control_3wf_29_C11440_30s.avi	0.132377	0	3
Control_3wf_34_C11440_30s.avi	0.115708	0	3
Control_3wm_02_C11440_30s.avi	0.527247	0	3
Control_3wm_03_C11440_30s.avi	0.667994	0	3
Control_3wm_07_C11440_30s.avi	0.522326	0	3
Control_3wm_10_C11440_30s.avi	0.214389	0	3
Control_3wm_16_C11440_30s.avi	0.735636	0	3
Control_3wm_24_C11440_30s.avi	0.122373	0	3
Control_3wm_25_C11440_30s.avi	0.601531	0	3
Control_3wm_27_C11440_30s.avi	0.334103	0	3
Control_3wm_36_C11440_30s.avi	0.560108	0	3
LamCG489V_3wf_03_C11440_30.avi	0.876	1	3
LamCG489V_3wf_06_C11440_30.avi	0.774236	1	3
LamCG489V_3wf_17_C11440_30.avi	0.159018	1	3
LamCG489V_3wf_27_C11440_30.avi	0.959551	1	3
LamCG489V_3wf_31_C11440_30.avi	0.368892	1	3
LamCG489V_3wf_32_C11440_30.avi	0.377836	1	3
LamCG489V_3wf_33_C11440_30.avi	0.908887	1	3
LamCG489V_3wf_34_C11440_30.avi	0.743212	1	3
LamCG489V_3wm_25_C11440_30.avi	0.667994	1	3
LamCG489V_3wm_26_C11440_30.avi	0.903436	1	3
LamCG489V_3wm_27_C11440_30.avi	0.306756	1	3
LamCG489V_3wm_28_C11440_30.avi	0.84567	1	3
LamCG489V_3wm_32_C11440_30.avi	0.601821	1	3
LamCG489V_3wm_34_C11440_30.avi	0.317334	1	3
LamCG489V_3wm_37_C11440_30.avi	0.75981	1	3
Control_3wf_03_C11440_30s.avi	0.117695	0	4
Control_3wf_04_C11440_30s.avi	0.771733	0	4
Control_3wf_07_C11440_30s.avi	0.0898665	0	4
Control_3wf_08_C11440_30s.avi	0.0477071	0	4
Control_3wf_09_C11440_30s.avi	0.293354	0	4
Control_3wf_14_C11440_30s.avi	0.23999	0	4
Control_3wf_18_C11440_30s.avi	0.232645	0	4
Control_3wf_35_C11440_30s.avi	0.0185014	0	4
Control_3wf_36_C11440_30s.avi	0.445264	0	4
Control_3wm_01_C11440_30s.avi	0.598862	0	4
Control_3wm_06_C11440_30s.avi	0.0378463	0	4
Control_3wm_09_C11440_30s.avi	0.64042	0	4
Control_3wm_12_C11440_30s.avi	0.493076	0	4
Control_3wm_22_C11440_30s.avi	0.102071	0	4
Control_3wm_33_C11440_30s.avi	0.149539	0	4
Control_3wm_35_C11440_30s.avi	0.264469	0	4
Control_3wm_40_C11440_30s.avi	0.913608	1	4
LamCG489V_3wf_02_C11440_30.avi	0.998695	1	4
LamCG489V_3wf_05_C11440_30.avi	0.995588	1	4
LamCG489V_3wf_11_C11440_30.avi	0.704333	1	4
LamCG489V_3wf_13_C11440_30.avi	0.0709833	1	4
LamCG489V_3wf_22_C11440_30.avi	0.230049	1	4
LamCG489V_3wf_30_C11440_30.avi	0.901144	1	4
LamCG489V_3wf_35_C11440_30.avi	0.870312	1	4
LamCG489V_3wm_02_C11440_30.avi	0.197855	1	4
LamCG489V_3wm_08_C11440_30.avi	0.876873	1	4
LamCG489V_3wm_15_C11440_30.avi	0.284189	1	4
LamCG489V_3wm_18_C11440_30.avi	0.230999	1	4
LamCG489V_3wm_19_C11440_30.avi	0.998454	1	4
LamCG489V_3wm_23_C11440_30.avi	0.766574	1	4
LamCG489V_3wm_24_C11440_30.avi	0.998733	1	4
Control_3wf_02_C11440_30s.avi	0.397162	0	5
Control_3wf_15_C11440_30s.avi	0.261635	0	5
Control_3wf_21_C11440_30s.avi	0.0297977	0	5
Control_3wf_22_C11440_30s.avi	0.00978529	0	5
Control_3wf_38_C11440_30s.avi	0.196826	0	5
Control_3wm_11_C11440_30s.avi	0.279755	0	5
Control_3wm_13_C11440_30s.avi	0.0969216	0	5
Control_3wm_15_C11440_30s.avi	0.118268	0	5
Control_3wm_17_C11440_30s.avi	0.225953	0	5
Control_3wm_20_C11440_30s.avi	0.502428	0	5
Control_3wm_21_C11440_30s.avi	0.691249	0	5
Control_3wm_26_C11440_30s.avi	0.0420565	0	5
Control_3wm_34_C11440_30s.avi	0.110938	0	5
Control_3wm_37_C11440_30s.avi	0.0996672	0	5
LamCG489V_3wf_09_C11440_30.avi	0.121189	0	5
LamCG489V_3wf_10_C11440_30.avi	0.609658	1	5
LamCG489V_3wf_14_C11440_30.avi	0.458319	1	5
LamCG489V_3wf_21_C11440_30.avi	0.839633	1	5
LamCG489V_3wf_24_C11440_30.avi	0.381812	1	5
LamCG489V_3wf_25_C11440_30.avi	0.262672	1	5
LamCG489V_3wf_28_C11440_30.avi	0.497857	1	5
LamCG489V_3wf_29_C11440_30.avi	0.722393	1	5
LamCG489V_3wf_37_C11440_30.avi	0.187252	1	5
LamCG489V_3wf_38_C11440_30.avi	0.698064	1	5
LamCG489V_3wm_03_C11440_30.avi	0.225953	1	5
LamCG489V_3wm_11_C11440_30.avi	0.72299	1	5
LamCG489V_3wm_12_C11440_30.avi	0.336976	1	5
LamCG489V_3wm_29_C11440_30.avi	0.854244	1	5
LamCG489V_3wm_33_C11440_30.avi	0.331916	1	5
LamCG489V_3wm_36_C11440_30.avi	0.885138	1	5
LamCG489V_3wm_38_C11440_30.avi	0.0681962	1	5
